# Supplementary material for: A Probabilistic Model to Predict Clinical Phenotypic Traits from Genome Sequencing
Source: PubMed Central journal article supplement (PMC4154636; doi:10.1371/journal.pcbi.1003825), 2014-09-04

Status  0  1  N/A  N/C

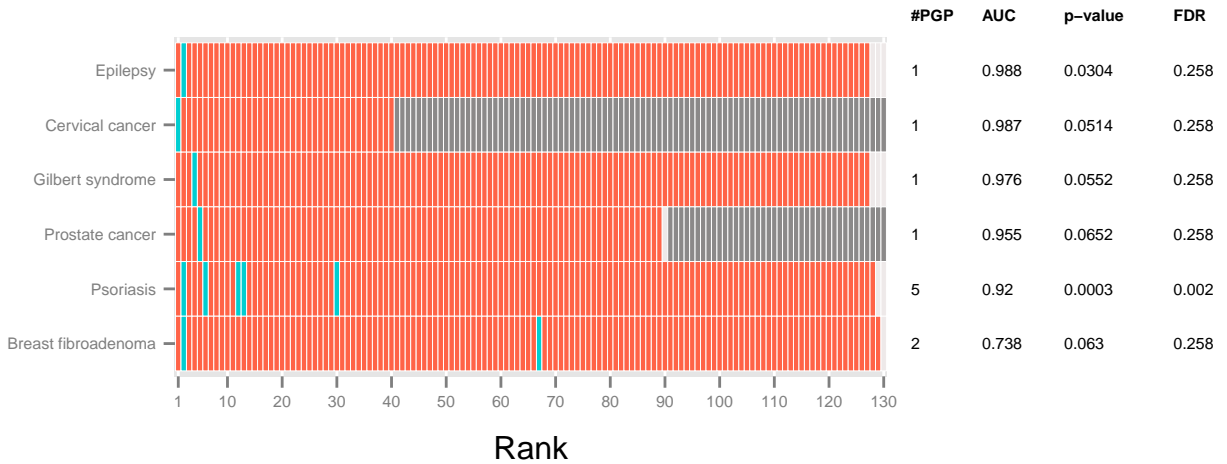

Supplement: pcbi.1003825.s001.pdf [file pcbi.1003825.s001.pdf]
