# Supplementary material for: A Probabilistic Model to Predict Clinical Phenotypic Traits from Genome Sequencing
Source: PLoS Comput Biol. 2014 Sep 4;10(9):e1003825. doi: 10.1371/journal.pcbi.1003825 (PMC4154636; doi:10.1371/journal.pcbi.1003825)
Supplement: Table S13 — Variant Effect Scoring Tool (VEST) scores. All variants scored by VEST are shown. Columns A–L list genomic location, strand, reference and alternative alleles, HUGO identifiers, amino acid substitutions, VEST score, VEST p-value, and MAF in European-American (EA), African-American (AA) populations (from Exome Variant Server), and 1000 genomes database where available. (XLSX) [file pcbi.1003825.s014.xlsx]

## Sheet: TableS12
Table S13		A probabilistic model to predict clinical phenotypic traits from genome sequencing. Chen et al.
Chrom	Position	Strand	Ref_Nuc	Alt_Nuc	Hugo Gene	AA_Change	VEST	Pval	EA MAF	AA MAF	1000g MAF
CHR17	4675376	+	C	A	TM4SF5	F53L	0.371	0.2366	0	0.000116279	0
CHR20	57768655	+	G	A	ZNF831	D861N	0.047	0.8299	0.00412088	0.00906977	0.00839764
CHR2	86831751	+	G	C	RNF103	L421V	0.327	0.2731	0.00457875	0.00406977	0.00113482
CHR1	186370281	+	C	G	OCLM	S35C	0.426	0.2017	0.00228938	0.00732558	0.00068089
CHRX	142795212	+	G	A	SPANXN2	P156S	0.147	0.5196	0	0	0
CHR3	14860707	+	C	A	FGD5	D43E	0.081	0.7044	0.00320513	0	0
CHR12	26275898	+	C	T	BHLHE41	V184I	0.14	0.5352	0	0.00127907	0.00068089
CHR19	12126348	+	G	A	ZNF433	T445M	0.202	0.4165	0	0.00162791	0.000226963
CHR6	107390341	+	T	C	BEND3	E685G	0.402	0.2165	0	0	0
CHR5	114916295	+	G	C	TICAM2	T220S	0.059	0.7827	0	0.000465116	0
CHR17	34901641	+	C	T	GGNBP2	P23L	0.973	0.0026	0	0	0
CHRX	37061736	+	C	T	FTH1P18	R9H	0.034	0.8803	0	0	0
CHR8	92972595	+	G	A	RUNX1T1	P527S	0.736	0.065	0	0	0
CHR2	176043884	+	G	C	ATP5G3	A72G	0.823	0.0386	0	0	0
CHR6	31868184	+	A	G	ZBTB12	V300A	0.128	0.5645	0	0	0
CHR19	40828271	+	A	G	C19orf47	F226L	0.623	0.1066	0	0.000116279	0
CHR8	145579312	+	A	C	FBXL6	L494R	0.892	0.0195	0	0.000116279	0
CHR11	5842283	+	T	A	OR52N2	F240I	0.356	0.2483	0.00137363	0.00511628	0.00136178
CHR5	140574238	+	C	T	PCDHB10	L705F	0.076	0.7208	0.00137363	0	0
CHR6	119137445	+	C	A	MCM9	Q658H	0.098	0.6453	0.00457875	0	0
CHR19	14200767	+	C	A	SAMD1	G156C	0.189	0.4374	0	0	0
CHR3	49455307	+	T	C	AMT	E270G	0.253	0.3491	0	0	0
CHR12	11174786	+	C	G	TAS2R19	V129L	0.131	0.5573	0	0	0
CHR8	42711505	+	C	T	RNF170	G108R	0.925	0.0116	0	0	0
CHR2	179612024	+	C	T	TTN	V5035I	0.009	0.9767	0	0	0
CHR4	38830379	+	A	G	TLR6	I239T	0.156	0.5002	0	0	0
CHR19	42906068	+	A	C	LIPE	C1043G	0.909	0.0154	0	0	0
CHR5	140249586	+	G	T	PCDHA11	E300*	0.995158	Nonsense	0	0	0
CHR11	49075573	+	T	A	TRIM64C	H349L	0.041	0.8538	0	0	0
CHR12	19592787	+	G	A	AEBP2	E52K	0.318	0.2814	0	0	0
CHR1	84944978	+	G	A	RPF1	G5E	0.443	0.1923	0	0.00116279	0.000453926
CHR1	156830770	+	G	T	NTRK1	W15L	0.3	0.2984	0	0	0
CHR5	140475396	+	A	T	PCDHB2	D341V	0.93	0.0107	0	0	0
CHR17	38061156	+	T	C	GSDMB	Y365C	0.012	0.9664	0	0.000116279	0
CHR2	237074753	+	A	G	GBX2	L284P	0.839	0.0336	0	0	0
CHR12	103696179	+	T	C	C12orf42	R264G	0.109	0.6146	0	0	0
CHR18	44560732	+	C	G	TCEB3B	D302H	0.156	0.5002	0.000457875	0.00662791	0
CHR21	34876622	+	C	T	GART	E948K	0.934	0.0102	0	0	0
CHR6	21594847	+	C	G	SOX4	L28V	0.288	0.309	0.00869963	0.00918605	0.000907853
CHR3	99569799	+	T	C	FILIP1L	M1V	0.823	0.0386	0	0	0
CHR3	98518530	+	T	C	DCBLD2	I672V	0.038	0.8641	0.000915751	0.00534884	0.00113482
CHR22	45279151	+	G	A	PHF21B	R417C	0.069	0.7455	0	0.00116279	0.000453926
CHR18	13884862	+	A	G	MC2R	I219T	0.456	0.1852	0	0	0
CHR5	140812787	+	T	A	PCDHGA12	*821K	0.995158	Readthrough	0	0	0
CHR17	79219873	+	G	A	SLC38A10	A948V	0.292	0.3052	0	0.00174419	0.000453926
CHR19	7038089	+	A	C	MBD3L4	I137S	0.044	0.8418	0	0	0
CHR11	12399111	+	C	T	PARVA	Q13*	0.991315	Nonsense	0	0	0
CHR2	233414504	+	C	A	TIGD1	G30V	0.425	0.2024	0	0	0
CHR19	9921880	+	G	A	FBXL12	R225C	0.586	0.1226	0.0018315	0.0022093	0.000453926
CHR1	43917211	+	A	T	HYI	H210Q	0.961	0.0045	0	0	0
CHR5	180278091	+	T	C	ZFP62	N102S	0.005	0.9906	0	0.000116279	0
CHR19	21476962	+	T	C	ZNF708	K269R	0.032	0.889	0	0	0
CHR13	108862121	+	A	G	LIG4	V499A	0.205	0.4119	0	0.000348837	0
CHR2	165349593	+	C	T	GRB14	V526I	0.07	0.7416	0	0.000232558	0
CHR6	1313241	+	G	A	FOXQ1	G101D	0.261	0.3392	0	0.00418605	0.00136178
CHR11	57480167	+	A	G	TMX2	Y26C	0.08	0.7078	0.000457875	0	0
CHR19	10334671	+	T	C	S1PR2	Q304R	0.024	0.9193	0	0	0
CHR10	99218456	+	C	T	MMS19	G1029D	0.773	0.0536	0.00274725	0.00872093	0.000907853
CHR4	2819967	+	C	T	SH3BP2	P6L	0.051	0.8128	0	0	0
CHR11	5906117	+	A	G	OR52E4	I199V	0.171	0.471	0.00228938	0.00616279	0.00158874
CHR11	77727937	+	C	T	KCTD14	R157H	0.611	0.112	0.000457875	0.000930233	0.000226963
CHR14	105418939	+	G	A	AHNAK2	A950V	0.067	0.7529	0.0018315	0	0
CHR3	107096877	+	C	T	CCDC54	S148F	0.359	0.2462	0	0.00186047	0.000226963
CHR5	36195350	+	T	C	NADKD1	M246V	0.927	0.0113	0	0.00104651	0
CHR3	45637718	+	A	C	LIMD1	L449F	0.384	0.2274	0	0	0
CHR16	23079872	+	C	A	USP31	R1185L	0.406	0.2139	0	0.000465116	0
CHR6	7402881	+	A	G	RIOK1	I207V	0.234	0.3717	0.00412088	0.0027907	0.000226963
CHR15	31776042	+	C	T	OTUD7A	G746R	0.26	0.3403	0	0	0
CHR3	43122190	+	T	C	GTDC2	Y245C	0.856	0.0285	0	0	0
CHR2	130910340	+	T	A	SMPD4	R695W	0.039	0.8605	0	0	0
CHR1	156777095	+	C	G	SH2D2A	G321R	0.197	0.4247	0	0	0
CHR22	37770699	+	A	C	ELFN2	D292E	0.369	0.238	0	0.000581395	0
CHR17	42475791	+	A	C	GPATCH8	D1218E	0.035	0.8761	0	0	0
CHR7	128865147	+	C	T	AHCYL2	A77V	0.288	0.309	0	0	0
CHR12	176349	+	T	G	IQSEC3	S101A	0.097	0.6485	0	0	0
CHR9	135545995	+	G	A	GTF3C4	A4T	0.219	0.3916	0.00274725	0.00476744	0.00113482
CHR11	48346604	+	T	G	OR4C3	F38V	0.461	0.1826	0	0	0
CHR22	46652516	+	T	A	PKDREJ	Y2235F	0.2	0.4194	0.00137363	0.00325581	0.000226963
CHR9	130269174	+	C	G	FAM129B	A718P	0.092	0.6656	0	0	0
CHR17	3336493	+	T	C	OR1E2	I215V	0.081	0.7044	0	0	0
CHRX	130419322	+	C	G	IGSF1	E166D	0.536	0.145	0.000602773	0.000697674	0.000226963
CHR7	101460948	+	A	G	CUX1	K10R	0.214	0.3991	0	0	0
CHR3	194362826	+	G	A	LSG1	R650C	0.706	0.0748	0.000457875	0	0
CHR11	70319336	+	T	G	SHANK2	T1142P	0.095	0.6554	0	0	0
CHR20	48552995	+	G	C	RNF114	G16R	0.081	0.7044	0.000457875	0.000348837	0
CHR19	53303113	+	G	A	ZNF28	P662L	0.272	0.3263	0	0	0
CHR11	10874862	+	T	A	ZBED5	D544V	0.662	0.0916	0.000915751	0	0
CHR17	42082405	+	C	A	NAGS	T125K	0.493	0.1655	0.00228938	0.00197674	0.00068089
CHR14	20181502	+	C	T	OR11H2	V192I	0.245	0.3576	0	0	0
CHR3	75786619	+	T	C	ZNF717	R719G	0.393	0.2221	0	0	0
CHR2	233897461	+	A	C	NEU2	Y27S	0.692	0.0793	0	0	0
CHR9	125437664	+	T	G	OR1L3	L86V	0.362	0.2434	0.00641026	0.00953488	0.00136178
CHR16	84224873	+	A	G	ADAD2	S13G	0.02	0.9347	0	0.000116279	0
CHR4	187455100	+	C	T	MTNR1A	A266T	0.062	0.7715	0.00137363	0.000581395	0.000226963
CHR11	19077223	+	A	G	MRGPRX2	W243R	0.474	0.1751	0.00274725	0.00593023	0.00113482
CHR2	27601152	+	C	T	ZNF513	G234R	0.476	0.1739	0.000457875	0.000116279	0
CHR19	41932374	+	C	T	B3GNT8	E104K	0.343	0.2587	0.000457875	0.000232558	0
CHR19	53303125	+	C	G	ZNF28	S658T	0.081	0.7044	0	0	0
CHR10	127705850	+	A	C	ADAM12	*910G	0.995158	Readthrough	0	0	0
CHR10	15121009	+	T	C	ACBD7	R15G	0.438	0.1948	0	0	0
CHRX	154689386	+	A	G	H2AFB2	L68P	0.827	0.0377	0	0	0
CHR12	54349159	+	A	G	HOXC12	D149G	0.342	0.2596	0	0	0
CHR12	11244027	+	T	C	TAS2R43	R268G	0.142	0.5303	0	0	0
CHR1	45271740	+	A	G	TCTEX1D4	S201P	0.949	0.0068	0	0	0
CHR3	75787269	+	G	T	ZNF717	T502K	0.309	0.2898	0	0	0
CHR16	67862399	+	C	T	CENPT	D514N	0.326	0.274	0	0	0
CHR7	54624989	+	G	C	LOC285878	E1+	0.979788	Splice site	0.00915751	0	0
CHR6	26251994	+	C	A	HIST1H2BH	S39Y	0.515	0.1551	0	0	0
CHR2	131113681	+	A	G	PTPN18	M1V	0.762	0.0569	0	0	0
CHR4	436505	+	G	A	ZNF721	P584L	0.11	0.612	0	0	0
CHR11	7949861	+	C	T	OR10A6	A117T	0.172	0.4692	0.000915751	0.00383721	0.000907853
CHR11	111385683	+	A	C	C11orf88	R58S	0.145	0.524	0	0	0
CHR11	62285402	+	C	T	AHNAK	G5496E	0.28	0.3175	0.000457875	0.00325581	0.000453926
CHR1	152082286	+	A	C	TCHH	L1136R	0.133	0.5515	0	0	0
CHRX	43809163	+	C	G	NDP	C95S	0.986	0.0006	0	0	0
CHR17	20769954	+	T	G	CCDC144NL	T160P	0.29	0.3071	0	0	0
CHR9	107361100	+	G	T	OR13C5	L199M	0.171	0.471	0	0	0
CHR3	128720907	+	C	T	EFCC1	H146Y	0.647	0.0969	0	0	0
CHR17	73663478	+	C	T	SAP30BP	S9L	0.878	0.0234	0.000457875	0	0
CHR1	175129570	+	G	C	KIAA0040	A66G	0.08	0.7078	0	0	0.000226963
CHR4	8582719	+	G	A	GPR78	G4S	0.141	0.5326	0.0018315	0.00267442	0.000453926
CHR1	107600579	+	C	T	PRMT6	P308S	0.013	0.9623	0	0	0
CHR14	44975017	+	C	T	FSCB	A392T	0.133	0.5515	0.00137363	0.00244186	0.00113482
CHR19	17566578	+	C	T	NXNL1	E173K	0.09	0.6726	0	0	0
CHR1	152282590	+	C	T	FLG	G1591E	0.109	0.6146	0	0	0
CHR7	127669514	+	G	A	LRRC4	H394Y	0.686	0.0817	0	0	0
CHRX	46360423	+	G	A	ZNF674	R195*	0.995158	Nonsense	0.00120555	0.00453488	0.00113482
CHR7	43916266	+	T	C	URGCP	*889W	0.991315	Readthrough	0	0	0
CHR19	12575341	+	C	T	ZNF709	M465I	0.154	0.5041	0	0	0
CHR5	180276468	+	T	C	ZFP62	D643G	0.598	0.1178	0	0	0
CHR5	140502683	+	G	T	PCDHB4	R368L	0.54	0.1432	0	0.000348837	0
CHR18	44561601	+	T	C	TCEB3B	E12G	0.165	0.4832	0	0	0
CHR7	64452126	+	G	A	ERV3-1	R427*	0.995158	Nonsense	0.000457875	0.00267442	0.000453926
CHR17	64873571	+	A	G	CACNG5	I41V	0.107	0.6201	0	0	0
CHR4	187455447	+	A	G	MTNR1A	L150P	0.823	0.0386	0	0	0
CHR1	32193185	+	G	A	BAI2	R1532C	0.509	0.1576	0.00274725	0.00895349	0.00158874
CHR11	10529739	+	G	A	MTRNR2L8	S12L	0.091	0.6693	0	0	0
CHR19	23836246	+	T	C	ZNF675	T497A	0.021	0.9306	0	0.000348837	0
CHR1	13496069	+	A	T	PRAMEF16	R130S	0.098	0.6453	0	0	0
CHR2	97526872	+	C	T	SEMA4C	V665M	0.546	0.1401	0.00137363	0.00186047	0.000226963
CHR5	140778947	+	T	C	PCDHGB5	I418T	0.794	0.0473	0	0	0
CHR6	2890726	+	G	A	SERPINB9	L268F	0.063	0.7674	0.00274725	0.00139535	0
CHR16	61687613	+	A	C	CDH8	S767A	0.558	0.1352	0	0	0
CHR18	65181101	+	T	C	DSEL	I259V	0.086	0.6875	0.0018315	0.000232558	0.0043123
CHR4	982720	+	G	C	SLC26A1	D669E	0.113	0.6033	0.000915751	0.00186047	0.000453926
CHR6	143074516	+	G	A	HIVEP2	P2357S	0.117	0.5926	0	0.00139535	0
CHR2	45170049	+	G	A	SIX3	R269K	0.274	0.3237	0	0	0
CHR4	8442571	+	G	C	TRMT44	G8R	0.093	0.6622	0	0	0
CHR1	19166823	+	C	T	TAS1R2	R597H	0.577	0.1265	0.000915751	0	0
CHR11	64756870	+	G	T	BATF2	Q186K	0.121	0.5817	0.000457875	0.000116279	0
CHR8	105503527	+	A	C	LRP12	S633A	0.294	0.3036	0	0	0
CHR9	14863	+	A	C	WASH1	L448V	0.3	0.2984	0	0.0094186	0.00158874
CHR18	19996396	+	A	G	CTAGE1	I460T	0.174	0.4652	0	0.000465116	0
CHR4	265955	+	T	C	ZNF732	I230V	0.078	0.7145	0.00137363	0.000813953	0
CHR6	26056575	+	C	T	HIST1H1C	A28T	0.303	0.2955	0	0.0022093	0.000226963
CHR1	240256473	+	A	G	FMN2	E355G	0.217	0.3941	0	0	0
CHR11	64757067	+	T	G	BATF2	Q120P	0.335	0.2653	0	0	0
CHR22	28379581	+	C	T	TTC28	R2025Q	0.297	0.3013	0	0	0
CHR16	76311574	+	C	T	CNTNAP4	T5M	0.207	0.409	0.000915751	0.000581395	0
CHR18	72345344	+	A	G	ZNF407	D790G	0.166	0.4807	0	0	0
CHR15	62456313	+	G	A	C2CD4B	L291F	0.306	0.2926	0	0	0
CHR2	54342846	+	C	T	ACYP2	A4V	0.241	0.3627	0.000457875	0.00162791	0.000453926
CHR18	58039248	+	G	A	MC4R	T112M	0.722	0.0694	0	0.000697674	0
CHR6	29641252	+	A	C	ZFP57	F212L	0.149	0.5152	0	0	0
CHR5	140529938	+	G	A	PCDHB6	V34I	0.089	0.6759	0.00274725	0.00406977	0.00068089
CHR1	248722722	+	T	C	OR2T29	Q24R	0.251	0.3511	0	0	0
CHR1	15438981	+	G	A	KAZN	V703I	0.072	0.7351	0	0.000813953	0
CHR15	83316612	+	G	A	CPEB1	P4S	0.145	0.524	0	0.000813953	0
CHR9	136029416	+	C	G	GBGT1	E198Q	0.301	0.2976	0	0.000465116	0
CHR9	100617049	+	G	A	FOXE1	D285N	0.029	0.9003	0	0	0
CHR6	158735061	+	G	A	TULP4	V5M	0.741	0.0635	0	0	0
CHRX	114425872	+	G	A	RBMXL3	R623H	0.064	0.7643	0	0	0
CHR19	53761857	+	G	T	VN1R2	V77F	0.25	0.3524	0.00595238	0.00906977	0.00181571
CHR2	109403291	+	G	C	CCDC138	V5L	0.137	0.5415	0	0.000116279	0
CHR6	7727522	+	G	C	BMP6	E112Q	0.128	0.5645	0	0	0
CHR14	105609400	+	G	A	JAG2	R1079W	0.173	0.4675	0.00503663	0.00872093	0.00068089
CHR11	77378092	+	G	A	RSF1	T1399I	0.14	0.5352	0	0	0
CHR17	8702186	+	G	T	MFSD6L	L85I	0.383	0.2281	0	0	0
CHR10	119044547	+	G	A	PDZD8	P566L	0.121	0.5817	0.000457875	0.000116279	0.00476623
CHR15	99645904	+	C	T	SYNM	R167C	0.7	0.077	0	0	0
CHR6	109787398	+	T	A	ZBTB24	M584L	0.204	0.4134	0.000457875	0.00174419	0
CHR22	50986858	+	G	A	KLHDC7B	R88K	0.034	0.8803	0	0	0
CHR8	81400006	+	G	A	ZBTB10	A321T	0.018	0.9422	0	0.000465116	0
CHR16	81095025	+	G	A	C16orf46	A310V	0.062	0.7715	0	0.000116279	0
CHR6	168376869	+	C	T	HGC6.3	G155E	0.027	0.9076	0	0	0
CHR12	130648446	+	G	C	FZD10	G320A	0.712	0.0726	0	0.000232558	0
CHR19	15198499	+	C	G	OR1I1	T208S	0.095	0.6554	0	0	0
CHR14	21992051	+	G	C	SALL2	A604G	0.556	0.1357	0	0.000116279	0
CHR13	20763218	+	T	C	GJB2	K168R	0.849	0.0302	0.000915751	0	0
CHR1	5923427	+	A	T	NPHP4	F1393L	0.758	0.0581	0.0018315	0.00244186	0.000453926
CHR3	75786610	+	T	A	ZNF717	K722*	0.995158	Nonsense	0	0	0
CHR6	137143862	+	A	G	PEX7	Y20C	0.864	0.0263	0	0	0
CHR11	57003536	+	G	A	APLNR	R315C	0.717	0.0712	0	0	0
CHR7	143885454	+	T	C	ARHGEF35	H8R	0.214	0.3991	0	0	0
CHR19	50169291	+	G	C	BCL2L12	E71Q	0.089	0.6759	0	0	0
CHR19	7992167	+	C	T	TIMM44	V422M	0.891	0.0198	0	0	0
CHR6	99848489	+	C	T	PNISR	R782Q	0.239	0.365	0	0	0
CHR16	28391142	+	G	T	EIF3C	Q908K	0.182	0.4505	0	0	0
CHR3	51929096	+	C	T	IQCF1	R143H	0.244	0.359	0.00503663	0.0077907	0.00136178
CHR19	22939437	+	C	T	ZNF99	G912R	0.167	0.479	0	0	0
CHR15	45695556	+	C	T	SPATA5L1	P310L	0.569	0.1299	0	0	0
CHR2	196602786	+	A	T	DNAH7	Y3978*	0.995158	Nonsense	0.00274725	0.00232558	0.00068089
CHR8	18079746	+	C	T	NAT1	R64W	0.765	0.0561	0.00137363	0.0077907	0.00113482
CHR3	138739340	+	T	C	PRR23B	D55G	0.076	0.7208	0	0	0
CHR1	152277121	+	T	C	FLG	H3414R	0.091	0.6693	0	0	0
CHR11	4904087	+	A	G	OR51T1	R347G	0.04	0.8573	0	0	0
CHR9	35738880	+	C	T	GBA2	V606I	0.103	0.6315	0	0	0
CHR1	152082670	+	C	G	TCHH	R1008P	0.295	0.3028	0	0	0
CHR15	65134221	+	G	T	PLEKHO2	E2D	0.257	0.3441	0	0	0
CHR17	4535186	+	T	C	ALOX15	M603V	0.078	0.7145	0.000915751	0.00209302	0.000226963
CHR7	39990899	+	A	G	CDK13	D220G	0.035	0.8761	0	0	0
CHR11	119205987	+	C	T	RNF26	T52I	0.314	0.2851	0	0.000116279	0
CHR14	105411765	+	G	C	AHNAK2	D3341E	0.096	0.6519	0	0	0
CHRX	34148921	+	T	C	FAM47A	H492R	0.183	0.4487	0.00180832	0.00162791	0.00476623
CHR15	49284505	+	G	A	SECISBP2L	S1036F	0.027	0.9076	0	0	0
CHR4	140640715	+	G	A	MAML3	A1056V	0.68	0.0839	0	0	0.000226963
CHR6	31973653	+	A	T	CYP21A2	H63L	0.077	0.7176	0	0	0
CHR21	45978043	+	G	A	KRTAP10-3	P186S	0.189	0.4374	0	0	0
CHR10	105036973	+	G	A	INA	S2N	0.159	0.4942	0	0	0
CHR6	27879647	+	T	G	OR2B2	S151R	0.665	0.0903	0	0.000232558	0
CHR19	9407413	+	A	G	ZNF699	Y223H	0.274	0.3237	0	0	0
CHR4	89013496	+	C	T	ABCG2	D620N	0.069	0.7455	0.00228938	0.00534884	0.000226963
CHR2	129026320	+	G	A	HS6ST1	P218S	0.485	0.1688	0.00228938	0.00372093	0.00068089
CHR22	37602780	+	C	T	SSTR3	E355K	0.337	0.2631	0	0.000581395	0.00068089
CHR19	40900763	+	G	A	PRX	P1166S	0.067	0.7529	0	0.000813953	0.000453926
CHR4	104000859	+	T	C	BDH2	*246W	0.995158	Readthrough	0	0	0
CHR2	177016603	+	A	T	HOXD4	E81V	0.784	0.05	0	0	0
CHR1	151265464	+	A	G	PI4KB	S67P	0.024	0.9193	0	0	0
CHR11	118895589	+	G	A	TRAPPC4	V202M	0.074	0.7279	0	0	0
CHR1	153066113	+	G	A	SPRR2E	P39S	0.263	0.3367	0.00274725	0.000348837	0
CHR19	56125969	+	G	A	ZNF865	G329R	0.346	0.2565	0	0	0
CHR10	102987297	+	C	A	LBX1	E192D	0.629	0.1041	0	0	0
CHR14	19553642	+	A	G	POTEG	S76G	0.145	0.524	0	0	0
CHR22	38864273	+	A	G	KDELR3	H12R	0.922	0.0126	0	0	0
CHR9	5922860	+	T	C	KIAA2026	S1046G	0.053	0.8056	0	0.000116279	0
CHR15	29415549	+	T	G	FAM189A1	Q538P	0.876	0.0237	0	0	0
CHR22	22869528	+	G	T	ZNF280A	P143T	0.093	0.6622	0.00915751	0.000930233	0.00068089
CHR3	20027047	+	C	A	PP2D1	S573I	0.185	0.4453	0	0	0
CHR2	220421379	+	G	A	OBSL1	T1378M	0.416	0.2078	0	0.000232558	0.000226963
CHR1	120337269	+	T	G	REG4	Q150P	0.761	0.0571	0	0	0
CHR6	13616710	+	C	T	NOL7	P115S	0.653	0.0946	0	0.00232558	0.000453926
CHR13	28973215	+	C	T	FLT1	S531N	0.006	0.9877	0	0	0
CHR16	1962141	+	G	A	HS3ST6	T129M	0.873	0.0245	0.000915751	0.00162791	0.000226963
CHR11	48285686	+	C	T	OR4X1	L92F	0.09	0.6726	0.00137363	0.00534884	0.00113482
CHR12	55886984	+	C	T	OR6C68	L275F	0.347	0.2557	0.000457875	0.000232558	0
CHR14	105609207	+	T	C	JAG2	E1143G	0.097	0.6485	0	0	0
CHR17	40725136	+	T	G	PSMC3IP	K117Q	0.486	0.1684	0	0.000116279	0
CHR15	74032479	+	G	C	C15orf59	P221A	0.296	0.3022	0.003663	0.0022093	0.00158874
CHR5	139930460	+	A	G	SRA1	I151T	0.719	0.0705	0	0.000813953	0
CHR21	41385307	+	A	G	DSCAM	L1898P	0.681	0.0836	0	0	0
CHR10	99349889	+	A	C	C10orf62	T79P	0.555	0.136	0	0.000116279	0
CHRX	100747681	+	G	A	ARMCX4	V1369I	0.028	0.9035	0.00180832	0	0
CHR9	40774092	+	G	A	ZNF658	R395W	0.147	0.5196	0	0	0
CHRX	124456192	+	A	G	LOC100129520	K742E	0.012	0.9664	0	0	0
CHR17	79977215	+	G	A	STRA13	R106C	0.095	0.6554	0.003663	0.00604651	0.00068089
CHRX	24383350	+	A	T	SUPT20HL1	T825S	0.007	0.9848	0	0	0
CHR11	48367073	+	A	C	OR4C45	F249C	0.281	0.3163	0	0	0
CHR3	75786773	+	T	A	ZNF717	R667S	0.448	0.1895	0	0	0
CHR16	3349203	+	T	A	TIGD7	Q471L	0.162	0.489	0	0	0
CHR8	27145183	+	G	A	TRIM35	R456C	0.502	0.1615	0.003663	0.00325581	0.000907853
CHR16	1841905	+	G	A	IGFALS	L172F	0.857	0.0281	0	0	0
CHR9	90744764	+	A	G	SPATA31C2	L1063P	0.615	0.1104	0	0	0
CHRX	69665257	+	C	G	DLG3	P69R	0.241	0.3627	0	0	0
CHR3	51431420	+	C	A	RBM15B	Q864K	0.71	0.0734	0	0	0.000226963
CHRX	24382423	+	G	C	SUPT20HL1	A516P	0.165	0.4832	0	0	0
CHR2	96780763	+	C	T	ADRA2B	V376I	0.773	0.0536	0.00228938	0.00337209	0.00068089
CHRX	131212294	+	T	C	FRMD7	E584G	0.179	0.4564	0	0	0
CHR2	114257354	+	A	G	FOXD4L1	H174R	0.346	0.2565	0	0	0
CHR7	142480034	+	C	A	PRSS2	Q43K	0.305	0.2934	0	0	0
CHR17	79203111	+	C	T	ENTHD2	V399I	0.028	0.9035	0	0.000116279	0
CHR17	30349325	+	C	T	LRRC37B	T387I	0.198	0.4227	0.000457875	0.00151163	0.000226963
CHR3	75786610	+	T	G	ZNF717	K722Q	0.328	0.2722	0	0	0
CHR20	23030015	+	C	T	THBD	A43T	0.086	0.6875	0.00595238	0.0044186	0.00181571
CHR22	30660053	+	C	T	OSM	R193K	0.088	0.6797	0	0	0
CHR1	21267821	+	G	A	EIF4G3	P19S	0.209	0.4058	0.00274725	0	0
CHR18	61323199	+	C	T	SERPINB3	V289M	0.115	0.5975	0	0	0
CHR11	116692175	+	C	T	APOA4	R200H	0.087	0.6831	0.000915751	0	0
CHR19	33878884	+	T	C	PEPD	D355G	0.112	0.6061	0.00137363	0.00488372	0.00068089
CHR5	166711862	+	G	A	TENM2	R7Q	0.682	0.0832	0.00412088	0	0
CHR3	39229781	+	C	T	XIRP1	E386K	0.912	0.0149	0.00137363	0.00651163	0.00113482
CHR1	11848781	+	C	A	C1orf167	Q462K	0.028	0.9035	0	0	0
CHR8	145729788	+	A	G	GPT	E34G	0.862	0.0266	0	0	0
CHR1	152129115	+	T	C	RPTN	R154G	0.163	0.4871	0	0.00232558	0.00068089
CHR5	140167295	+	A	G	PCDHA1	I474V	0.13	0.5596	0.00320513	0.00186047	0.000453926
CHR19	4891564	+	C	T	ARRDC5	E175K	0.163	0.4871	0.00274725	0.0044186	0.00068089
CHR5	140250933	+	T	A	PCDHA11	Y749N	0.285	0.3124	0	0	0
CHR19	20807622	+	G	T	ZNF626	S354Y	0.132	0.5542	0	0	0
CHR18	14106088	+	T	C	ZNF519	K151E	0.136	0.5441	0	0	0
CHR17	46669607	+	C	T	HOXB5	M258I	0.621	0.1074	0	0	0
CHR8	10466152	+	G	A	RP1L1	A1819V	0.02	0.9347	0	0	0.000226963
CHR16	9858173	+	G	T	GRIN2A	N1076K	0.42	0.2051	0.0018315	0.00616279	0.00136178
CHR12	48596765	+	A	G	OR10AD1	F104S	0.636	0.1008	0.00824176	0.000232558	0
CHR13	23904298	+	T	G	SACS	N4573H	0.218	0.3929	0.003663	0.00465116	0.00113482
CHR4	15005076	+	C	A	CPEB2	P260Q	0.046	0.8336	0	0	0
CHR1	45810807	+	C	T	TESK2	R474Q	0.083	0.6979	0	0.000116279	0
CHR12	123200485	+	T	C	HCAR3	E267G	0.12	0.5844	0	0	0
CHR5	112769675	+	C	A	TSSK1B	G288W	0.295	0.3028	0.00228938	0.00697674	0.00226963
CHR11	56143108	+	C	G	OR8U8	H3Q	0.115	0.5975	0	0	0
CHR12	52215806	+	C	A	FIGNL2	G131V	0.432	0.1984	0	0	0
CHR9	131708326	+	G	C	DOLK	I419M	0.412	0.2104	0	0.000232558	0
CHR1	152083499	+	G	C	TCHH	R732G	0.277	0.3201	0	0	0
CHR2	70439942	+	T	C	TIA1	N346S	0.147	0.5196	0.00778388	0.00988372	0.000907853
CHR11	56310564	+	G	A	OR5M11	T57M	0.166	0.4807	0	0.00151163	0.00068089
CHR14	105413668	+	A	C	AHNAK2	V2707G	0.62	0.1082	0	0.000116279	0
CHR21	45959256	+	C	A	KRTAP10-1	A260S	0.123	0.5771	0	0	0
CHR17	40342339	+	C	A	GHDC	G443C	0.109	0.6146	0	0.000116279	0
CHR6	28358867	+	T	C	ZSCAN12	I400M	0.217	0.3941	0	0.000116279	0
CHR11	450471	+	C	T	PTDSS2	R6C	0.218	0.3929	0	0	0
CHR9	73151387	+	C	T	TRPM3	G1373R	0.371	0.2366	0.00274725	0.00162791	0.000453926
CHR1	29447977	+	T	A	TMEM200B	M122L	0.558	0.1352	0	0	0
CHR5	140625603	+	C	T	PCDHB15	P153S	0.113	0.6033	0	0.00116279	0.000226963
CHR1	113244160	+	T	G	RHOC	I175L	0.013	0.9623	0	0.000581395	0
CHR1	228595954	+	G	A	TRIM17	P461L	0.494	0.1652	0	0	0
CHR7	64451610	+	C	A	ERV3-1	V599F	0.277	0.3201	0	0	0
CHR1	173873176	+	C	A	SERPINC1	A416S	0.852	0.0294	0.000457875	0.00174419	0
CHR5	138730211	+	T	C	PROB1	E187G	0.601	0.1166	0	0	0
CHR7	142749823	+	G	A	OR6V1	R129H	0.095	0.6554	0.000457875	0.00127907	0
CHR1	45795060	+	C	T	MUTYH	R495H	0.113	0.6033	0	0	0
CHR19	9435378	+	A	T	ZNF559	I20F	0.104	0.6278	0	0	0
CHR20	39990261	+	G	A	EMILIN3	Q650*	0.995158	Nonsense	0	0	0
CHR19	53344810	+	T	C	ZNF468	D246G	0.096	0.6519	0	0	0
CHR19	10625033	+	C	T	S1PR5	V219I	0.171	0.471	0	0.00162791	0
CHR7	76140315	+	G	A	UPK3B	D61N	0.013	0.9623	0	0.00116279	0
CHR3	50597129	+	G	A	C3orf18	R130W	0.371	0.2366	0	0	0
CHR1	10700044	+	A	C	CASZ1	F1412C	0.694	0.0788	0.000915751	0.0022093	0.000226963
CHR11	68029588	+	G	T	C11orf24	T292N	0.111	0.6087	0	0.000116279	0
CHR1	120928505	+	A	G	FCGR1B	*225Q	0.952892	Readthrough	0	0	0
CHR11	71249343	+	G	A	KRTAP5-8	G81D	0.262	0.3381	0	0	0
CHR7	150778855	+	T	G	TMUB1	R174S	0.333	0.2672	0.000915751	0.00197674	0.000453926
CHR22	39917960	+	A	T	ATF4	T137S	0.039	0.8605	0.0018315	0.00639535	0.00272356
CHRX	114425139	+	C	T	RBMXL3	R379W	0.178	0.4581	0	0	0
CHR19	44301873	+	T	C	LYPD5	E166G	0.377	0.2321	0	0	0
CHR11	66627620	+	G	T	LRFN4	R621L	0.364	0.2419	0	0	0
CHR1	2522431	+	A	G	MMEL1	*780Q	0.995158	Readthrough	0	0	0
CHR19	23927436	+	T	C	ZNF681	R306G	0.13	0.5596	0	0	0
CHR17	79219937	+	T	C	SLC38A10	K927E	0.099	0.6423	0.00228938	0.00523256	0.000226963
CHR10	93299	+	G	A	TUBB8	L345F	0.197	0.4247	0	0	0
CHR3	159943981	+	T	G	C3orf80	S187A	0.276	0.3214	0	0	0
CHR17	37565415	+	T	C	MED1	K1020R	0.144	0.5264	0	0.000465116	0
CHR2	189599515	+	T	A	DIRC1	N45Y	0.322	0.2779	0.00228938	0.00418605	0.00113482
CHR16	69153626	+	G	T	CHTF8	P236T	0.402	0.2165	0	0	0
CHR17	72838738	+	C	G	GRIN2C	G1180R	0.064	0.7643	0	0	0
CHR11	48238897	+	T	C	OR4B1	L179P	0.833	0.0354	0	0	0
CHR13	103249509	+	G	A	TPP2	A41T	0.661	0.0922	0	0.00267442	0
CHR12	20522796	+	T	C	PDE3A	V193A	0.275	0.3224	0.0018315	0.00546512	0.00068089
CHR11	111745734	+	T	C	FDXACB1	D596G	0.856	0.0285	0	0.000465116	0
CHR1	8073947	+	G	A	ERRFI1	P238S	0.247	0.3555	0	0	0
CHR1	152084720	+	G	C	TCHH	Q325E	0.097	0.6485	0	0	0
CHR16	20043673	+	A	G	GPR139	I149T	0.973	0.0026	0	0	0
CHR19	11277247	+	G	A	KANK2	S848L	0.371	0.2366	0	0.00139535	0.000453926
CHR1	231502181	+	A	T	EGLN1	D419E	0.155	0.5021	0	0	0
CHR5	140187182	+	A	C	PCDHA4	Q137P	0.242	0.3613	0.000457875	0.00116279	0
CHR1	152282597	+	G	A	FLG	R1589C	0.257	0.3441	0	0.000232558	0
CHR16	33961378	+	C	T	LINC00273	G355R	0.05	0.8172	0	0	0
CHR18	580412	+	G	A	CETN1	A2T	0.502	0.1615	0.003663	0.00209302	0.000453926
CHR3	46783919	+	T	C	PRSS45	N203S	0.018	0.9422	0	0.00139535	0
CHR20	2464876	+	C	A	ZNF343	R244I	0.26	0.3403	0	0	0
CHR1	40539750	+	T	C	PPT1	I199V	0.037	0.8681	0.000457875	0.000697674	0.000453926
CHR4	190990106	+	C	G	DUX2	D400E	0.055	0.7986	0	0	0
CHR5	140626707	+	T	C	PCDHB15	Y521H	0.515	0.1551	0.000915751	0.00453488	0.00068089
CHRX	152160022	+	C	T	PNMA5	A41T	0.052	0.8093	0	0.000581395	0.000226963
CHR9	116136262	+	G	A	HDHD3	R125C	0.556	0.1357	0	0	0
CHR17	38249304	+	A	G	THRA	K381R	0.556	0.1357	0	0	0
CHR16	68056829	+	C	T	DDX28	A93T	0.324	0.276	0	0.000581395	0.000226963
CHR6	43401027	+	A	G	ABCC10	N394D	0.389	0.2247	0.00274725	0.00569767	0.000907853
CHR17	27890082	+	T	C	ABHD15	T302A	0.163	0.4871	0.00412088	0.0077907	0.00136178
CHR11	103907617	+	C	T	DDI1	P23S	0.141	0.5326	0	0	0
CHR19	53116475	+	C	T	ZNF83	R420Q	0.004	0.9934	0	0.000116279	0
CHR11	5373124	+	A	C	OR51B6	R129S	0.718	0.0709	0.00732601	0.00127907	0.00748979
CHR8	145700016	+	C	G	FOXH1	G235R	0.202	0.4165	0	0	0
CHR1	248616408	+	C	T	OR2T2	L104F	0.128	0.5645	0	0	0
CHR18	5291200	+	T	C	ZBTB14	E336G	0.296	0.3022	0	0	0
CHR10	38121630	+	T	C	ZNF248	K218R	0.082	0.7012	0.000915751	0.000232558	0
CHR3	75786741	+	A	G	ZNF717	M678T	0.478	0.1729	0	0	0
CHR5	158585742	+	G	A	RNF145	A643V	0.056	0.7946	0	0.000348837	0
CHR19	50364942	+	A	G	PNKP	C437R	0.631	0.103	0	0	0
CHR12	50570975	+	C	A	LIMA1	E416*	0.995158	Nonsense	0	0	0
CHR5	140589016	+	C	A	PCDHB12	H179Q	0.173	0.4675	0	0.000116279	0
CHR3	16926544	+	T	G	PLCL2	D3E	0.085	0.6913	0	0	0
CHR14	24909458	+	C	T	SDR39U1	R238H	0.195	0.4284	0	0.00255814	0.000226963
CHR14	24769809	+	G	A	NOP9	S148N	0.302	0.2967	0.000457875	0.00302326	0.00113482
CHR12	53343340	+	A	T	KRT18	H128L	0.843	0.0321	0	0.000232558	0
CHR1	20440683	+	C	T	PLA2G2D	R121H	0.312	0.2871	0	0	0
CHR21	44836654	+	A	C	SIK1	C774G	0.097	0.6485	0	0	0
CHR2	73520702	+	T	C	EGR4	Y18C	0.509	0.1576	0	0	0
CHR17	39240886	+	C	G	KRTAP4-7	T143S	0.042	0.8494	0	0	0
CHR21	47655187	+	T	C	MCM3AP	I1980V	0.232	0.3744	0	0	0
CHR19	23836119	+	T	C	ZNF675	E539G	0.207	0.409	0	0	0
CHR10	100219492	+	C	G	HPSE2	V428L	0.439	0.1943	0.00320513	0.005	0.000226963
CHR12	52680206	+	T	G	KRT81	S451R	0.693	0.079	0	0	0
CHR19	57286636	+	C	T	ZIM2	R335Q	0.241	0.3627	0	0.000465116	0.000226963
CHR1	41483486	+	C	T	SLFNL1	V260M	0.648	0.0964	0.000457875	0.000348837	0
CHR6	157100585	+	C	T	ARID1B	P508S	0.135	0.5464	0	0.000581395	0
CHR19	49244660	+	G	T	IZUMO1	S277Y	0.208	0.4073	0	0.000930233	0.000907853
CHRX	130678919	+	T	C	OR13H1	L291P	0.904	0.0166	0	0	0
CHR10	105127906	+	T	G	TAF5	S54A	0.073	0.7315	0	0	0
CHR19	53208291	+	T	G	ZNF611	T604P	0.267	0.3322	0	0	0
CHR11	48367419	+	G	A	OR4C45	P134S	0.009	0.9767	0	0	0
CHR7	130418638	+	C	T	KLF14	G75S	0.246	0.3565	0	0	0
CHR16	3433622	+	A	G	ZSCAN32	S230P	0.184	0.447	0.000915751	0	0
CHR20	36758680	+	C	T	TGM2	E669K	0.254	0.348	0	0.000232558	0
CHR14	105412225	+	T	G	AHNAK2	N3188T	0.026	0.9116	0	0	0
CHRX	100871411	+	C	G	ARMCX6	R67P	0.536	0.145	0	0	0
CHRX	100743682	+	A	G	ARMCX4	R36G	0.36	0.2453	0	0	0
CHR15	77907078	+	G	A	LINGO1	R391W	0.638	0.1	0	0.000232558	0
CHR9	3898742	+	C	T	GLIS3	A538T	0.052	0.8093	0	0	0
CHR11	89531533	+	G	T	TRIM49	A375E	0.075	0.7247	0	0	0
CHR17	72576199	+	A	G	CD300LD	L176P	0.71	0.0734	0	0	0
CHR19	14991366	+	A	G	OR7A17	S268P	0.187	0.4411	0	0	0
CHR8	11189513	+	A	G	SLC35G5	M300V	0.093	0.6622	0.0018315	0.00162791	0.000226963
CHR1	112270318	+	C	T	FAM212B	E41K	0.319	0.2804	0	0	0
CHR9	115759450	+	A	C	ZNF883	L364V	0.25	0.3524	0	0	0
CHR3	75786073	+	C	G	ZNF717	E901Q	0.009	0.9767	0	0	0
CHR10	72164174	+	G	A	EIF4EBP2	G6D	0.476	0.1739	0.000915751	0.00255814	0.000226963
CHR8	135490898	+	C	T	ZFAT	V1089M	0.144	0.5264	0	0	0
CHR6	29759980	+	C	T	LOC554223	P66S	0.006	0.9877	0	0	0
CHR8	146076474	+	C	A	COMMD5	A84S	0.059	0.7827	0	0.00151163	0.000453926
CHR10	135439049	+	G	C	FRG2B	P131A	0.09	0.6726	0	0	0
CHR14	101348572	+	C	T	RTL1	A852T	0.586	0.1226	0.00961538	0.00616279	0.00226963
CHR9	90745232	+	A	G	SPATA31C2	M907T	0.212	0.402	0	0	0
CHR5	180219763	+	C	T	MGAT1	G70E	0.093	0.6622	0	0.000348837	0
CHR20	61522352	+	C	G	DIDO1	Q1167H	0.28	0.3175	0.00320513	0.00755814	0.00204267
CHR8	8176428	+	G	T	SGK223	H1153N	0.217	0.3941	0	0	0
CHR5	118176782	+	T	C	DTWD2	T243A	0.033	0.8846	0.000457875	0.000813953	0.000226963
CHR17	47288118	+	A	G	ABI3	E11G	0.396	0.2204	0	0	0
CHR13	101184734	+	C	G	GGACT	E38Q	0.112	0.6061	0	0	0
CHR1	16091585	+	A	G	FBLIM1	E36G	0.037	0.8681	0	0	0
CHR11	70319533	+	A	G	SHANK2	S256P	0.069	0.7455	0.0018315	0.00418605	0.000453926
CHR14	100759283	+	G	A	SLC25A29	P69S	0.029	0.9003	0.00274725	0.00383721	0.000226963
CHR19	21580043	+	C	A	ZNF493	P2T	0.013	0.9623	0	0.000465116	0
CHR5	170736622	+	G	T	TLX3	A85S	0.14	0.5352	0	0.00186047	0
CHR9	5920454	+	T	G	KIAA2026	T1848P	0.153	0.5065	0.000915751	0.00348837	0.00113482
CHR11	55905194	+	T	C	OR8J3	M1V	0.79	0.0484	0	0.00151163	0.000226963
CHR13	103398641	+	T	G	CCDC168	K1469T	0.322	0.2779	0	0	0
CHR1	160915019	+	C	T	ITLN2	A297T	0.244	0.359	0.000457875	0.00267442	0.000226963
CHR1	152084687	+	C	T	TCHH	E336K	0.266	0.3335	0	0	0
CHR11	5536887	+	G	T	UBQLNL	T262K	0.3	0.2984	0	0.000116279	0
CHR1	209788642	+	C	T	LAMB3	V1165M	0.723	0.0691	0	0.000116279	0
CHR9	41327215	+	C	G	SPATA31A7	V41L	0.233	0.373	0	0	0
CHR7	77166931	+	A	G	PTPN12	N23S	0.055	0.7986	0	0	0
CHR9	94973151	+	C	T	IARS	V1243M	0.171	0.471	0	0.00116279	0
CHR10	69991242	+	T	C	ATOH7	R65G	0.29	0.3071	0.00595238	0.00755814	0.00272356
CHR15	31294996	+	C	T	TRPM1	E1281K	0.652	0.095	0.003663	0.00639535	0.000907853
CHR1	160160600	+	T	G	CASQ1	L20R	0.699	0.0773	0	0	0
CHR17	9801437	+	A	C	RCVRN	V193G	0.543	0.1417	0	0	0
CHR1	152080821	+	G	C	TCHH	D1624E	0.155	0.5021	0	0	0
CHR21	45978028	+	G	T	KRTAP10-3	P191T	0.361	0.2444	0	0	0
CHR5	7832056	+	A	T	C5orf49	F117L	0.31	0.2889	0.003663	0.00627907	0.000453926
CHR19	4891443	+	G	A	ARRDC5	T215I	0.887	0.0212	0	0.000348837	0.000226963
CHR11	96125332	+	C	T	JRKL	R507C	0.775	0.053	0	0	0.000226963
CHR6	73951389	+	T	C	KHDC1	I120V	0.034	0.8803	0	0.00267442	0.000453926
CHR12	63042276	+	A	G	PPM1H	L513P	0.562	0.1336	0	0	0
CHR11	74168361	+	C	T	KCNE3	R83H	0.684	0.0824	0.0018315	0.00674419	0.00181571
CHR16	1536557	+	C	T	PTX4	V269I	0.064	0.7643	0	0.000232558	0.000226963
CHR19	12936693	+	C	T	RTBDN	V167M	0.047	0.8299	0.00595238	0.00895349	0.000907853
CHR19	53208950	+	G	C	ZNF611	S384C	0.136	0.5441	0	0.000116279	0
CHR6	33245288	+	A	T	B3GALT4	E31V	0.52	0.1525	0	0	0
CHR1	152277035	+	T	C	FLG	R3443G	0.09	0.6726	0	0	0
CHR3	149459466	+	C	T	COMMD2	V148M	0.32	0.2797	0.000915751	0.005	0.000907853
CHR7	1273168	+	C	G	UNCX	P96R	0.447	0.19	0	0	0
CHR17	60779007	+	G	A	2014-03-10	T682M	0.021	0.9306	0	0.00162791	0.000453926
CHR1	152081071	+	C	T	TCHH	R1541H	0.154	0.5041	0.00915751	0.00209302	0.000907853
CHR11	114393032	+	G	C	NXPE1	I292M	0.637	0.1004	0	0.000465116	0.000226963
CHR7	133812220	+	G	A	LRGUK	A34T	0.056	0.7946	0.000915751	0.00697674	0.00113482
CHRX	100747964	+	C	T	ARMCX4	P1463L	0.03	0.8968	0	0	0
CHR14	45433351	+	A	G	FAM179B	K576R	0.036	0.8723	0	0	0
CHR11	62289241	+	G	T	AHNAK	D4216E	0.042	0.8494	0	0.000813953	0.000226963
CHR1	223286129	+	G	A	TLR5	T82I	0.17	0.4728	0.00320513	0.00604651	0.00136178
CHR1	151773919	+	C	T	LINGO4	R421Q	0.14	0.5352	0	0.000116279	0
CHR12	57910666	+	C	T	DDIT3	E146K	0.559	0.1348	0.00137363	0.00209302	0.000907853
CHR1	220863788	+	T	C	C1orf115	L15P	0.081	0.7044	0	0	0
CHR19	33167295	+	G	C	RGS9BP	K42N	0.135	0.5464	0	0.000348837	0
CHR9	104357062	+	C	T	PPP3R2	E51K	0.321	0.2787	0.000915751	0.00523256	0.00068089
CHR14	105517996	+	T	C	GPR132	I160V	0.02	0.9347	0	0	0
CHR19	44117531	+	T	A	SRRM5	Y420N	0.078	0.7145	0	0	0
CHRX	99551322	+	T	G	PCDH19	N1086H	0.02	0.9347	0.0066305	0	0
CHR19	19256609	+	C	T	MEF2BNB-MEF2B	G331D	0.377	0.2321	0	0.000465116	0
CHR1	89449298	+	C	G	RBMXL1	G71A	0.302	0.2967	0	0	0
CHR4	7043830	+	T	C	CCDC96	E279G	0.23	0.3769	0.0018315	0.000232558	0.000226963
CHR19	21910324	+	C	T	ZNF100	E264K	0.105	0.6254	0	0	0
CHR9	107379905	+	C	T	OR13C9	G194D	0.356	0.2483	0	0	0
CHR22	36886199	+	C	G	FOXRED2	E637D	0.066	0.7568	0.003663	0.00988372	0.00158874
CHR6	132891675	+	C	T	TAAR6	A72V	0.182	0.4505	0.003663	0.0072093	0.000907853
CHR6	40996118	+	C	A	UNC5CL	K517N	0.228	0.3792	0	0	0
CHR17	5418183	+	C	T	NLRP1	R1364Q	0.005	0.9906	0.000457875	0.000348837	0.000907853
CHR12	99020163	+	C	T	IKBIP	V227I	0.09	0.6726	0.000457875	0.00186047	0.000226963
CHR7	138145337	+	C	T	TRIM24	A15V	0.138	0.5394	0	0	0
CHR20	278781	+	T	C	ZCCHC3	V185A	0.506	0.1589	0	0	0
CHR1	36932463	+	A	G	CSF3R	M696T	0.024	0.9193	0.00595238	0.00651163	0.000907853
CHR4	38800259	+	A	C	TLR1	I65S	0.621	0.1074	0	0.000116279	0
CHR12	133287523	+	G	A	PGAM5	V21M	0.323	0.277	0	0	0
CHR14	22102187	+	T	C	OR10G2	D271G	0.195	0.4284	0	0	0
CHR6	170592125	+	G	A	DLL1	S706L	0.849	0.0302	0	0	0
CHR11	47594541	+	C	T	KBTBD4	V500I	0.096	0.6519	0	0.000930233	0
CHR2	179613179	+	G	A	TTN	P4650S	0.006	0.9877	0.00320513	0.00430233	0.00113482
CHR12	111800819	+	A	T	FAM109A	C119S	0.28	0.3175	0	0	0
CHR19	17004116	+	C	T	CPAMD8	G1868R	0.323	0.277	0	0.000232558	0.000226963
CHR1	53308575	+	C	T	ZYG11A	P7L	0.411	0.2111	0	0	0
CHR12	6804653	+	C	A	PIANP	G257V	0.382	0.2287	0	0	0
CHR5	140071240	+	C	G	HARS2	L3V	0.199	0.4211	0.00320513	0.000930233	0.000453926
CHR14	20711912	+	G	A	OR11H4	R321H	0.1	0.6398	0	0	0
CHR5	112770224	+	G	A	TSSK1B	R105W	0.237	0.3679	0	0.000232558	0
CHR16	20043125	+	A	G	GPR139	S332P	0.824	0.0383	0	0	0
CHR11	110300857	+	G	A	FDX1	G5R	0.376	0.2328	0	0	0
CHR1	152278049	+	A	C	FLG	Y3105D	0.104	0.6278	0	0	0
CHR7	149571044	+	G	A	ATP6V0E2	G13S	0.099	0.6423	0.00228938	0	0
CHR11	695769	+	G	A	TMEM80	R54Q	0.169	0.4752	0	0	0
CHR6	168708762	+	G	A	DACT2	R559C	0.664	0.0909	0	0	0
CHR3	195452018	+	A	G	MUC20	S147G	0.015	0.9542	0	0	0
CHR22	42522601	+	T	C	CYP2D6	Y439C	0.162	0.489	0.000915751	0	0.000226963
CHR2	234526556	+	A	G	UGT1A8	K68R	0.08	0.7078	0	0	0
CHR17	8656458	+	A	G	SPDYE4	*238Q	0.995158	Readthrough	0	0	0
CHR17	39346328	+	A	G	KRTAP9-1	T64A	0.138	0.5394	0.00137363	0	0
CHR7	150325372	+	G	A	GIMAP6	S105L	0.078	0.7145	0.00137363	0.00406977	0.000453926
CHR15	54305612	+	G	A	UNC13C	R171H	0.803	0.0444	0.00274725	0.005	0.00158874
CHR7	142480034	+	C	T	PRSS2	Q43*	0.972104	Nonsense	0	0	0
CHR2	240969704	+	A	G	OR6B2	I48T	0.066	0.7568	0	0	0
CHR11	5410956	+	C	A	OR51M1	Q110K	0.323	0.277	0.000457875	0.00232558	0
CHR11	69456230	+	A	G	CCND1	K50R	0.085	0.6913	0	0	0
CHR17	36486848	+	C	G	GPR179	E868D	0.242	0.3613	0.000915751	0.00418605	0.00068089
CHR6	21595712	+	C	T	SOX4	A316V	0.337	0.2631	0.00412088	0.00395349	0.000453926
CHR19	35773509	+	C	A	HAMP	A10D	0.69	0.0801	0	0	0
CHR11	48285839	+	G	A	OR4X1	V143M	0.408	0.2129	0.0018315	0.00546512	0.00295052
CHR7	1097813	+	A	G	GPR146	D221G	0.476	0.1739	0.00320513	0.00430233	0.000226963
CHR1	67878898	+	G	C	SERBP1	L386V	0.577	0.1265	0	0	0
CHR1	220921974	+	C	G	2014-03-02	A34G	0.313	0.2864	0	0	0
CHR19	53117079	+	A	G	ZNF83	Y247H	0.013	0.9623	0	0	0
CHR7	150325591	+	T	C	GIMAP6	E32G	0.069	0.7455	0.00274725	0.00290698	0.00113482
CHR8	10467517	+	C	T	RP1L1	G1364E	0.023	0.9235	0	0	0
CHR16	30544041	+	C	A	ZNF747	V258F	0.119	0.587	0.003663	0	0
CHR11	56230082	+	C	T	OR5M9	V266I	0.078	0.7145	0	0.000348837	0
CHR5	140788592	+	G	T	PCDHGB6	A275S	0.499	0.1632	0	0.00360465	0.00068089
CHR14	22133469	+	C	T	OR4E2	P58L	0.615	0.1104	0	0	0
CHR16	88500057	+	C	A	ZNF469	S2032Y	0.137	0.5415	0	0	0
CHR20	2082781	+	G	C	STK35	G85A	0.118	0.5898	0	0	0
CHR8	86089708	+	G	C	E2F5	G18A	0.104	0.6278	0	0	0
CHR21	46117796	+	G	A	KRTAP10-12	R227H	0.192	0.4332	0	0.000232558	0
CHR9	100365004	+	G	C	TSTD2	S433C	0.782	0.0505	0	0.000813953	0
CHR4	437832	+	G	A	ZNF721	R142C	0.121	0.5817	0.00320513	0.000232558	0
CHR2	131976262	+	A	G	POTEE	N96S	0.109	0.6146	0	0	0
CHR2	241631376	+	G	A	AQP12A	A16T	0.167	0.479	0	0	0
CHR6	26087686	+	G	C	HFE	R6S	0.409	0.2124	0	0.000697674	0.000226963
CHR11	5878206	+	G	C	OR52E8	L243V	0.189	0.4374	0	0	0
CHR14	21109226	+	C	T	OR6S1	V209I	0.394	0.2216	0	0.000116279	0
CHR14	19377690	+	A	T	OR11H12	T33S	0.14	0.5352	0	0	0
CHR11	49053281	+	A	C	TRIM49B	K44Q	0.051	0.8128	0	0	0
CHR10	61718130	+	C	A	C10orf40	M100I	0.095	0.6554	0	0	0
CHR7	129074435	+	A	G	STRIP2	E41G	0.398	0.2193	0	0	0
CHR1	185089203	+	A	G	TRMT1L	V561A	0.054	0.8022	0	0.000232558	0
CHR22	32756520	+	A	G	RFPL3	S190G	0.207	0.409	0	0	0
CHR6	17764516	+	T	C	KIF13A	D1700G	0.071	0.7386	0	0	0
CHR11	3249311	+	C	T	MRGPRE	R240Q	0.111	0.6087	0.000457875	0.000348837	0.00340445
CHR15	71125058	+	A	G	LARP6	I270T	0.382	0.2287	0	0	0
CHRX	152710845	+	A	T	TREX2	L15Q	0.978	0.0017	0	0.00267442	0.00113482
CHR6	27277212	+	C	A	POM121L2	S913I	0.043	0.8457	0.00961538	0.00313953	0.000226963
CHR1	39879040	+	C	A	KIAA0754	P1035T	0.106	0.6225	0	0	0
CHR8	145947547	+	G	A	ZNF251	R500W	0.437	0.1953	0	0	0
CHR1	17312596	+	T	A	ATP13A2	T1121S	0.032	0.889	0.003663	0.00162791	0.000226963
CHR7	16640454	+	G	A	ANKMY2	L420F	0.099	0.6423	0.00641026	0.0094186	0.00136178
CHR5	140263649	+	C	A	PCDHA13	A599D	0.8	0.0452	0.00228938	0.00162791	0.00113482
CHR8	94747147	+	G	A	RBM12B	R498C	0.033	0.8846	0.000457875	0.00267442	0.000907853
CHR14	24769222	+	G	C	NOP9	R21P	0.399	0.2187	0.003663	0.00755814	0.00226963
CHR7	149462168	+	C	T	ZNF467	V475I	0.054	0.8022	0	0	0
CHR1	112270093	+	G	C	FAM212B	Q116E	0.119	0.587	0	0	0
CHR4	48492450	+	C	T	ZAR1	L48F	0.072	0.7351	0	0	0
CHR1	152277315	+	C	G	FLG	E3349D	0.088	0.6797	0	0	0
CHR7	121944239	+	T	C	FEZF1	S85G	0.003	0.9958	0	0.00813953	0.000907853
CHR2	202400734	+	T	C	ALS2CR11	R506G	0.015	0.9542	0	0	0
CHR11	48347099	+	G	C	OR4C3	A203P	0.364	0.2419	0	0	0
CHR7	56131970	+	G	A	SUMF2	G8D	0.232	0.3744	0	0	0
CHRX	75003725	+	C	T	MAGEE2	E388K	0.372	0.2357	0	0.000813953	0.000226963
CHR5	99871359	+	G	A	FAM174A	G42D	0.087	0.6831	0.00320513	0.00639535	0.00136178
CHR2	242811915	+	C	T	CXXC11	R3W	0.076	0.7208	0.00228938	0.00337209	0.000226963
CHR20	419235	+	G	A	TBC1D20	P403S	0.553	0.137	0	0	0
CHR11	124412914	+	C	T	OR8B12	V213I	0.123	0.5771	0	0	0
CHR19	53761683	+	G	A	VN1R2	A19T	0.149	0.5152	0	0.000813953	0.000453926
CHR10	81272773	+	T	C	EIF5AL1	I123T	0.371	0.2366	0	0	0
CHR8	142367803	+	G	A	GPR20	A74V	0.784	0.05	0	0	0
CHR8	13424600	+	A	T	C8orf48	T34S	0.051	0.8128	0.000457875	0.000697674	0.000226963
CHR8	94146594	+	C	T	C8orf87	A79T	0.021	0.9306	0.0018315	0	0
CHR2	219029646	+	C	A	CXCR1	A97S	0.172	0.4692	0	0	0
CHR17	17409148	+	T	G	PEMT	E186A	0.338	0.2625	0	0	0
CHR19	46216110	+	G	A	FBXO46	S215F	0.139	0.5371	0	0	0
CHR19	59074133	+	T	A	MZF1	Q504L	0.742	0.0633	0	0.00197674	0.000907853
CHR1	109793621	+	A	G	CELSR2	E307G	0.723	0.0691	0	0	0
CHR10	89621800	+	A	T	KLLN	W149R	0.3	0.2984	0.00503663	0.000813953	0.00181571
CHR9	133769185	+	G	A	QRFP	P14L	0.285	0.3124	0	0	0
CHR1	35452986	+	C	G	ZMYM6	E1233Q	0.358	0.2468	0	0	0
CHR9	3828319	+	C	T	GLIS3	V761M	0.235	0.3702	0.000457875	0.000232558	0
CHR8	67477003	+	T	C	MYBL1	T670A	0.204	0.4134	0	0	0
CHR6	43044640	+	G	A	PTK7	G7R	0.145	0.524	0.00869963	0	0
CHR12	55863388	+	T	G	OR6C70	I179L	0.303	0.2955	0	0	0
CHR1	152129381	+	C	T	RPTN	R65Q	0.232	0.3744	0.000915751	0.000465116	0
CHR1	248790425	+	G	A	OR2T11	T2M	0.101	0.6371	0.000915751	0.00151163	0.00226963
CHR17	27051802	+	A	T	TLCD1	M110K	0.876	0.0237	0	0	0
CHR1	182353569	+	C	T	GLUL	G365S	0.577	0.1265	0	0	0
CHR9	115513324	+	C	T	SNX30	H15Y	0.036	0.8723	0	0	0
CHR9	34371842	+	T	A	KIAA1161	E367V	0.379	0.2307	0	0	0
CHR11	4471500	+	A	G	OR52K2	R311G	0.613	0.1112	0.00457875	0.00825581	0.000907853
CHR19	42381421	+	T	G	CD79A	F16C	0.044	0.8418	0	0	0
CHR14	24617510	+	A	G	RNF31	Q128R	0.102	0.6344	0	0	0
CHR10	89120780	+	G	A	FAM22D	G237S	0.163	0.4871	0	0	0
CHR1	117910824	+	C	A	MAN1A2	L7M	0.526	0.1498	0	0	0
CHR4	22390261	+	C	T	GPR125	M1011I	0.144	0.5264	0	0	0
CHR13	25671850	+	G	A	PABPC3	R505Q	0.065	0.7605	0	0	0
CHR3	113377951	+	T	C	KIAA2018	S860G	0.07	0.7416	0	0	0
CHR17	1549767	+	C	A	RILP	C392F	0.136	0.5441	0.00595238	0.000116279	0
CHR7	100304646	+	G	A	POP7	A65T	0.047	0.8299	0	0	0
CHR3	49755995	+	T	C	AMIGO3	T302A	0.084	0.6946	0	0	0
CHR12	52680190	+	G	T	KRT81	P456Q	0.548	0.1389	0	0	0
CHR5	54516613	+	G	A	MCIDAS	R247W	0.183	0.4487	0	0	0
CHR4	110662144	+	G	A	CFI	P553S	0.292	0.3052	0.000457875	0.00174419	0.00068089
CHR14	44975246	+	T	G	FSCB	K315N	0.048	0.825	0	0	0
CHR12	130647554	+	T	C	FZD10	S23P	0.695	0.0786	0	0	0
CHR21	40568528	+	T	C	BRWD1	K2156R	0.07	0.7416	0.000457875	0.00290698	0.00068089
CHR3	184800795	+	T	C	C3orf70	*251W	0.995158	Readthrough	0	0	0
CHR2	172641788	+	T	A	SLC25A12	Q678L	0.502	0.1615	0	0	0
CHR3	133647212	+	G	C	C3orf36	P146A	0.108	0.6173	0.00320513	0.00930233	0.0024966
CHR8	98290012	+	C	A	TSPYL5	A21S	0.105	0.6254	0.00137363	0.00302326	0.000453926
CHR8	6264210	+	G	A	MCPH1	D8N	0.108	0.6173	0	0	0
CHR14	36295815	+	G	C	BRMS1L	E31D	0.198	0.4227	0	0.000813953	0
CHR12	11183898	+	C	T	TAS2R31	V13I	0.054	0.8022	0	0	0
CHR3	57542538	+	C	A	PDE12	D144E	0.143	0.5286	0	0.00267442	0.000453926
CHR2	174774847	+	C	T	SP3	R655Q	0.082	0.7012	0.000915751	0.00139535	0.000453926
CHR6	27879653	+	A	G	OR2B2	W149R	0.938	0.0091	0	0.000348837	0.000226963
CHR11	71146584	+	C	T	DHCR7	C422Y	0.966	0.0038	0	0	0
CHR19	4816598	+	C	A	TICAM1	G598W	0.561	0.1341	0	0.000697674	0
CHR18	47753921	+	G	T	CCDC11	Q459K	0.387	0.226	0	0	0
CHR2	71295695	+	G	A	NAGK	S7N	0.073	0.7315	0	0	0
CHR17	73235467	+	G	A	GGA3	S468L	0.785	0.0499	0.000915751	0.00162791	0.000453926
CHR22	45740442	+	G	A	SMC1B	R1235C	0.306	0.2926	0	0.000116279	0
CHR1	152275922	+	G	A	FLG	R3814C	0.142	0.5303	0.000915751	0.00372093	0.00113482
CHR11	5444364	+	A	C	OR51Q1	K312Q	0.048	0.825	0	0	0
CHR5	79616461	+	G	C	SPZ1	E143Q	0.077	0.7176	0	0	0
CHR2	220421320	+	C	T	OBSL1	V1398I	0.052	0.8093	0.00137363	0.00709302	0.00158874
CHR1	156642800	+	G	A	NES	P394S	0.06	0.7789	0	0	0
CHR6	16306858	+	G	A	ATXN1	A717V	0.041	0.8538	0.00320513	0.00430233	0.00136178
CHR19	20727685	+	T	C	ZNF737	T442A	0.074	0.7279	0	0	0
CHR16	75563835	+	C	T	CHST5	A150T	0.452	0.1875	0	0.00267442	0.00068089
CHR19	15272414	+	G	C	NOTCH3	R2009G	0.872	0.0249	0	0	0
CHR11	116691675	+	T	C	APOA4	T367A	0.064	0.7643	0	0	0
CHR4	120981323	+	T	C	MAD2L1	I190V	0.198	0.4227	0.00274725	0.00569767	0.00181571
CHR3	97806543	+	T	C	OR5AC2	I176T	0.503	0.161	0	0	0
CHR11	67395679	+	G	A	NUDT8	T150M	0.082	0.7012	0.000915751	0.00162791	0.000226963
CHR2	220379175	+	C	T	ASIC4	A37V	0.375	0.2336	0.003663	0.005	0.000453926
CHR2	74743189	+	T	C	TLX2	L243P	0.418	0.2066	0	0	0
CHR11	56143767	+	C	T	OR8U8	S223F	0.207	0.409	0	0	0
CHR9	104152872	+	T	C	MRPL50	H118R	0.818	0.0401	0	0	0
CHR20	13765892	+	G	A	NDUFAF5	A60T	0.044	0.8418	0	0.000348837	0
CHR19	7734298	+	A	G	RETN	N29S	0.012	0.9664	0.000457875	0	0
CHR21	45993729	+	T	C	KRTAP10-4	C32R	0.477	0.1735	0	0	0
CHR6	24495234	+	T	G	ALDH5A1	C4G	0.33	0.2702	0	0.00232558	0.000226963
CHR9	111625242	+	G	A	ACTL7A	G214S	0.882	0.0224	0.00457875	0.00593023	0.00226963
CHR11	71715129	+	G	A	NUMA1	S2047L	0.833	0.0354	0	0.00104651	0.000453926
CHR11	58979848	+	G	A	MPEG1	T164I	0.069	0.7455	0.000915751	0.00209302	0.000226963
CHR2	27888054	+	A	G	SLC4A1AP	K305E	0.587	0.1223	0	0	0
CHR3	49759280	+	C	T	GMPPB	V330I	0.523	0.1513	0	0	0
CHR5	139938337	+	G	A	APBB3	R430C	0.53	0.1477	0.00641026	0.00127907	0.000226963
CHR12	109017680	+	T	G	SELPLG	Q135P	0.257	0.3441	0	0	0
CHR5	140256468	+	G	C	PCDHA12	G471R	0.903	0.0169	0.00320513	0.00151163	0.000453926
CHR1	201952168	+	C	T	RNPEP	S125F	0.245	0.3576	0	0	0
CHR1	231762651	+	C	G	DISC1	A13G	0.105	0.6254	0	0	0
CHR13	28366909	+	C	T	GSX1	L28F	0.404	0.2152	0	0	0
CHR11	64808958	+	C	A	SAC3D1	P65Q	0.186	0.4431	0	0	0
CHR6	159457602	+	A	C	TAGAP	F307V	0.453	0.1865	0	0	0
CHR1	2252938	+	G	A	MORN1	R460W	0.663	0.0912	0	0	0.000226963
CHR5	140865198	+	C	T	PCDHGC4	P153L	0.793	0.0476	0	0	0
CHR2	39213021	+	G	C	SOS1	H1316D	0.708	0.074	0	0.000232558	0
CHR13	98829070	+	G	A	RNF113B	R141W	0.276	0.3214	0	0	0
CHR11	73019814	+	G	A	ARHGEF17	C44Y	0.394	0.2216	0	0	0
CHR3	48955828	+	A	T	ARIH2OS	L252H	0.303	0.2955	0	0	0
CHR5	140237650	+	C	T	PCDHA10	Q673*	0.995158	Nonsense	0	0.000813953	0
CHR3	75787081	+	A	T	ZNF717	C565S	0.383	0.2281	0	0	0
CHR19	5867459	+	C	T	FUT5	R93H	0.252	0.3501	0.00549451	0	0.00998638
CHR9	36037065	+	G	T	RECK	V24L	0.304	0.2943	0	0.00883721	0.00136178
CHR16	66586631	+	C	A	CKLF	Q5K	0.145	0.524	0	0.000116279	0.000226963
CHR16	3452338	+	A	G	ZNF174	M112V	0.126	0.5694	0	0	0
CHR3	75786256	+	T	A	ZNF717	K840*	0.791515	Nonsense	0	0	0
CHR1	156640469	+	C	T	NES	G1171S	0.171	0.471	0.000457875	0.0027907	0.00068089
CHR5	140222248	+	G	A	PCDHA8	V448M	0.569	0.1299	0	0	0
CHR1	1007255	+	G	C	RNF223	P231R	0.194	0.4301	0	0	0
CHR11	6221169	+	A	C	OR52W1	H239P	0.265	0.3348	0	0	0
CHR11	5988913	+	A	G	OR56A5	I271T	0.372	0.2357	0.00228938	0.00174419	0.000226963
CHR6	28541333	+	C	T	SCAND3	R778Q	0.416	0.2078	0.000915751	0.00430233	0.000907853
CHR1	247835646	+	T	C	OR13G1	K233R	0.124	0.5748	0	0	0
CHR12	57849399	+	C	T	INHBE	P27L	0.522	0.1519	0.00595238	0.005	0.00068089
CHR11	617538	+	G	A	CDHR5	P590L	0.068	0.7491	0	0	0.000226963
CHR5	140166396	+	C	T	PCDHA1	P174L	0.203	0.415	0	0.000232558	0
CHR19	44890887	+	A	G	ZNF285	I507T	0.033	0.8846	0	0.00139535	0
CHR8	146278068	+	G	T	C8orf33	A35S	0.149	0.5152	0	0.000116279	0
CHR6	46660160	+	A	G	TDRD6	K1432R	0.125	0.5721	0.000457875	0.00337209	0.00113482
CHR17	80332246	+	G	A	UTS2R	A16T	0.117	0.5926	0	0	0
CHR3	97887991	+	A	G	OR5H15	I150V	0.03	0.8968	0	0	0
CHR1	152187750	+	T	C	HRNR	S2119G	0.105	0.6254	0	0	0
CHR2	96993147	+	C	T	ITPRIPL1	R252C	0.158	0.496	0.0018315	0.00186047	0.000226963
CHR20	20349516	+	C	G	INSM1	P202R	0.189	0.4374	0	0	0
CHR1	152187762	+	C	A	HRNR	G2115W	0.319	0.2804	0	0	0
CHR11	5462553	+	G	C	OR51I1	F64L	0.424	0.2029	0.00228938	0.00348837	0.000907853
CHR3	75786354	+	G	A	ZNF717	T807I	0.299	0.2995	0	0	0
CHR9	37442475	+	T	C	ZBTB5	D25G	0.984	0.0006	0	0	0
CHR3	75787486	+	C	T	ZNF717	E430K	0.288	0.309	0	0	0
CHR19	42470983	+	A	G	ATP1A3	L1144P	0.052	0.8093	0.00778388	0	0
CHR9	215083	+	T	G	C9orf66	H105P	0.148	0.5176	0.00320513	0	0
CHR11	8132421	+	C	T	RIC3	D130N	0.297	0.3013	0.00457875	0.00767442	0.00181571
CHRX	85403800	+	G	A	DACH2	G59D	0.178	0.4581	0	0.000232558	0
CHR6	46661831	+	C	T	TDRD6	S1989L	0.129	0.5623	0	0.000116279	0.000226963
CHR11	130275533	+	C	T	ADAMTS8	G864S	0.374	0.2344	0.00320513	0.00651163	0.00226963
CHR12	11285884	+	C	A	TAS2R30	*320Y	0.995158	Readthrough	0	0.000348837	0
CHR2	95537644	+	G	A	TEKT4	R107H	0.37	0.2372	0.00412088	0.00627907	0.00113482
CHR9	41504682	+	G	A	SPATA31A7	G652S	0.071	0.7386	0	0	0
CHR5	192294	+	G	A	LRRC14B	R214H	0.092	0.6656	0	0.00104651	0.000226963
CHR9	95378199	+	T	C	IPPK	K464R	0.112	0.6061	0.00137363	0.00534884	0.00068089
CHR19	47422728	+	C	T	ARHGAP35	Q266*	0.995158	Nonsense	0	0	0
CHR1	156268740	+	G	C	VHLL	L81V	0.081	0.7044	0	0	0
CHR1	38022567	+	G	T	DNALI1	S13I	0.17	0.4728	0	0	0
CHR1	201328351	+	C	A	TNNT2	G252V	0.237	0.3679	0	0	0
CHR16	89724400	+	G	C	C16orf55	W55S	0.212	0.402	0	0	0
CHR2	15307172	+	T	C	NBAS	*2372W	0.995158	Readthrough	0	0	0
CHR16	239291	+	C	T	LUC7L	R341Q	0.283	0.3145	0	0	0
CHR21	32127623	+	C	T	KRTAP21-1	G25D	0.919	0.0132	0	0	0
CHR22	21903501	+	T	C	RIMBP3C	T589A	0.019	0.9391	0	0	0
CHR16	88495872	+	C	T	ZNF469	P665L	0.181	0.452	0.00503663	0	0
CHR13	49794476	+	G	A	MLNR	M1I	0.782	0.0505	0	0	0
CHR14	24608235	+	C	T	EMC9	G204E	0.276	0.3214	0.00457875	0.0055814	0.00181571
CHR20	47990568	+	C	A	KCNB1	G510V	0.202	0.4165	0	0	0
CHR17	56833612	+	C	G	PPM1E	P85R	0.231	0.3758	0.00595238	0.005	0.000907853
CHR12	1675943	+	C	T	FBXL14	V410M	0.131	0.5573	0	0.000116279	0
CHR17	1840079	+	C	T	RTN4RL1	R346Q	0.253	0.3491	0.00320513	0.00290698	0.000453926
CHR10	94025	+	T	C	TUBB8	K103E	0.503	0.161	0	0	0
CHR8	144941864	+	T	C	EPPK1	E1853G	0.049	0.8211	0	0	0
CHR19	868108	+	C	G	MED16	R876P	0.187	0.4411	0.00412088	0.01	0.00295052
CHR4	159048692	+	T	C	FAM198B	D476G	0.974	0.0023	0.0018315	0.00255814	0
CHR11	57996169	+	C	T	OR10Q1	R60H	0.084	0.6946	0	0.000116279	0
CHR6	26156758	+	C	T	HIST1H1E	A47V	0.599	0.1173	0.0018315	0.00267442	0.00158874
CHR5	121187855	+	C	G	FTMT	S66C	0.581	0.1248	0	0.000465116	0
CHR11	66083672	+	G	A	CD248	A276V	0.129	0.5623	0	0.0022093	0.000453926
CHR3	20082018	+	G	A	KAT2B	G17R	0.201	0.418	0	0	0
CHR14	75470349	+	C	T	EIF2B2	A127V	0.095	0.6554	0.00228938	0.00290698	0.000453926
CHR3	156978943	+	C	T	VEPH1	E783K	0.249	0.3533	0	0	0
CHR14	105415031	+	C	G	AHNAK2	G2253R	0.232	0.3744	0.00503663	0.00965116	0.00113482
CHR7	127222316	+	G	A	GCC1	R694W	0.406	0.2139	0	0	0.000226963
CHR17	33448833	+	A	G	FNDC8	M41V	0.18	0.4544	0	0.00127907	0
CHR1	151774330	+	G	A	LINGO4	S284F	0.957	0.0053	0.00320513	0.00453488	0.00113482
CHR19	33878347	+	A	G	PEPD	I398T	0.065	0.7605	0	0.000116279	0
CHR7	116165162	+	G	A	CAV1	G16R	0.026	0.9116	0.00137363	0.00302326	0.000453926
CHR1	52499180	+	T	C	KTI12	K85R	0.54	0.1432	0	0.000116279	0
CHR11	55340295	+	T	C	OR4C16	I231T	0.218	0.3929	0	0.000116279	0.000226963
CHR7	148768368	+	T	C	ZNF786	H499R	0.707	0.0743	0.000457875	0.00139535	0.000226963
CHR15	82336493	+	C	G	MEX3B	D240H	0.928	0.0111	0	0	0
CHR20	61477077	+	C	T	DPH3P1	T21I	0.167	0.479	0	0	0
CHR5	173316894	+	G	T	CPEB4	G53V	0.739	0.0639	0	0	0
CHR19	53269454	+	C	T	ZNF600	V519I	0.044	0.8418	0	0	0
CHRX	47092423	+	G	A	USP11	C37Y	0.156	0.5002	0	0.000813953	0
CHR16	88495575	+	C	T	ZNF469	A566V	0.33	0.2702	0.00549451	0	0
CHR17	65822335	+	G	C	BPTF	E165D	0.126	0.5694	0	0	0
CHR9	104335767	+	C	T	GRIN3A	V1013I	0.103	0.6315	0.000915751	0.000348837	0.000226963
CHR3	75787057	+	G	A	ZNF717	H573Y	0.261	0.3392	0	0	0
CHR15	25924583	+	G	A	ATP10A	R1469C	0.231	0.3758	0	0	0.000226963
CHR8	144942796	+	C	A	EPPK1	K1542N	0.069	0.7455	0.000915751	0.00767442	0.00113482
CHRX	55172537	+	G	A	FAM104B	R107*	0.991315	Nonsense	0	0	0
CHR17	39394622	+	C	T	KRTAP9-8	H107Y	0.113	0.6033	0	0	0
CHRX	153846138	+	T	G	CTAG1A	D141A	0.623	0.1066	0	0	0
CHR1	247150333	+	T	C	ZNF695	E495G	0.239	0.365	0	0	0
CHR16	20748367	+	G	T	THUMPD1	N299K	0.007	0.9848	0	0	0
CHR14	20182055	+	A	C	OR11H2	H7Q	0.165	0.4832	0	0	0
CHR10	61552725	+	A	G	CCDC6	S459P	0.494	0.1652	0	0	0
CHRX	38145646	+	T	C	RPGR	E869G	0.211	0.4035	0	0	0
CHR19	7754162	+	C	T	FCER2	G294S	0.127	0.5673	0	0.000348837	0
CHR1	1635011	+	A	G	CDK11A	V645A	0.068	0.7491	0	0	0
CHR19	4792599	+	G	A	FEM1A	A245T	0.063	0.7674	0	0	0
CHR20	31643355	+	T	C	BPIFB3	E1+	0.995158	Splice site	0	0.00244186	0.000453926
CHR3	75786415	+	C	T	ZNF717	E787K	0.505	0.1595	0	0	0
CHR11	44069804	+	G	A	ACCSL	R73H	0.086	0.6875	0.0018315	0.00174419	0.00113482
CHR12	49316910	+	A	G	FKBP11	L136S	0.108	0.6173	0.000457875	0	0
CHR7	127222589	+	G	C	GCC1	L603V	0.442	0.1926	0	0.000465116	0.000226963
CHR5	140348734	+	G	A	PCDHAC2	A795T	0.393	0.2221	0	0	0
CHR12	10962140	+	T	C	TAS2R9	K179E	0.345	0.2574	0.000915751	0.00476744	0.00113482
CHR6	46661170	+	C	T	TDRD6	R1769C	0.04	0.8573	0	0.000232558	0.000453926
CHR7	143088576	+	A	G	EPHA1	C969R	0.698	0.0776	0	0.000697674	0.000226963
CHR2	223289380	+	G	A	SGPP2	R20H	0.188	0.4393	0	0	0
CHR19	41082828	+	C	T	SHKBP1	A8V	0.087	0.6831	0	0	0
CHR8	11990617	+	C	A	USP17L7	R301L	0.137	0.5415	0	0	0
CHR4	435522	+	T	C	ZNF721	K912E	0.012	0.9664	0.000915751	0.000348837	0
CHR19	2276383	+	C	T	C19orf35	G240S	0.155	0.5021	0	0	0
CHR9	136198803	+	G	A	SURF6	R330C	0.326	0.274	0.00137363	0.00255814	0.000907853
CHR17	76989715	+	T	A	CANT1	M375L	0.278	0.3193	0.00228938	0.00244186	0.00317749
CHR12	50036064	+	A	C	PRPF40B	E644A	0.355	0.2491	0	0.000348837	0
CHR3	75788394	+	C	G	ZNF717	R127T	0.431	0.199	0	0	0
CHR1	152189172	+	C	A	HRNR	G1645W	0.261	0.3392	0	0	0
CHR1	182869312	+	A	G	SHCBP1L	Y590H	0.82	0.0397	0	0.000232558	0
CHR1	151378722	+	G	C	POGZ	P835R	0.096	0.6519	0.00320513	0.000813953	0
CHR14	105420590	+	C	T	AHNAK2	G400S	0.241	0.3627	0.000457875	0.00104651	0.00068089
CHR12	8211383	+	G	A	C3AR1	H467Y	0.112	0.6061	0	0	0
CHR19	22575264	+	A	C	ZNF98	I258R	0.208	0.4073	0	0	0
CHR17	39334280	+	C	A	KRTAP4-2	C46F	0.432	0.1984	0	0	0
CHR10	126678092	+	G	T	CTBP2	Q445K	0.63	0.1037	0	0	0
CHR21	37507643	+	G	C	CBR3	Q51H	0.259	0.3417	0	0.000232558	0
CHR5	140475542	+	G	T	PCDHB2	D390Y	0.682	0.0832	0	0	0
CHR11	48285770	+	C	T	OR4X1	R120C	0.147	0.5196	0.00595238	0.00848837	0.00226963
CHR6	132022525	+	G	A	OR2A4	T6I	0.101	0.6371	0	0.000116279	0
CHR1	205884202	+	A	G	SLC26A9	S828P	0.005	0.9906	0	0.000581395	0
CHR17	3627932	+	C	T	GSG2	H235Y	0.02	0.9347	0	0	0
CHR3	172351488	+	T	C	NCEH1	Q202R	0.083	0.6979	0	0	0
CHR9	125289223	+	G	A	OR1N1	A117V	0.547	0.1395	0	0	0
CHR19	45349825	+	A	C	PVRL2	T15P	0.111	0.6087	0	0	0
CHR19	15338373	+	T	A	EPHX3	S320C	0.213	0.4003	0	0	0
CHR11	125495891	+	G	A	CHEK1	W79*	0.991315	Nonsense	0	0	0
CHR9	3225104	+	C	T	RFX3	V730I	0.138	0.5394	0.000457875	0.00244186	0.000453926
CHR1	34330096	+	C	A	HMGB4	L102I	0.241	0.3627	0.0018315	0.0022093	0.00068089
CHR11	48285740	+	G	A	OR4X1	A110T	0.109	0.6146	0.00228938	0.000232558	0.00771675
CHR1	6653508	+	G	A	KLHL21	R571C	0.653	0.0946	0	0	0
CHR1	151105616	+	G	A	SEMA6C	R705C	0.054	0.8022	0	0.000232558	0
CHR19	58640281	+	A	C	ZNF329	L197R	0.138	0.5394	0	0.000232558	0
CHR17	8272484	+	A	G	KRBA2	S483P	0.334	0.2663	0	0	0
CHR19	52394703	+	C	T	ZNF649	R229K	0.063	0.7674	0	0	0
CHR1	120458270	+	G	C	NOTCH2	P2359A	0.285	0.3124	0.00228938	0.00348837	0.00113482
CHR10	43089278	+	T	C	ZNF33B	K374E	0.399	0.2187	0.0018315	0.00232558	0.000453926
CHR13	25671679	+	T	C	PABPC3	I448T	0.264	0.3359	0	0	0
CHR8	10467589	+	T	C	RP1L1	E1340G	0.016	0.9502	0	0	0
CHR11	56143556	+	T	A	OR8U8	F153I	0.216	0.396	0	0	0
CHR17	15134364	+	G	A	PMP22	T118M	0.931	0.0107	0.00228938	0.00534884	0.00068089
CHR6	39159072	+	T	A	KCNK5	K365I	0.666	0.0899	0.00274725	0.00313953	0.000453926
CHR16	33961395	+	G	C	LINC00273	A349G	0.033	0.8846	0	0	0
CHR1	248343343	+	A	C	OR2M2	N19T	0.108	0.6173	0.00137363	0.00174419	0
CHR1	39880019	+	A	C	KIAA0754	E1361A	0.12	0.5844	0.00549451	0.00755814	0.00181571
CHR16	31091076	+	C	T	ZNF646	P1144L	0.04	0.8573	0.00320513	0.00523256	0.00158874
CHR7	41729843	+	C	T	INHBA	R229Q	0.417	0.2074	0.000915751	0.00348837	0.000907853
CHR6	138725657	+	C	T	HEBP2	P9S	0.07	0.7416	0	0	0
CHR17	8701244	+	C	T	MFSD6L	G399S	0.092	0.6656	0.00320513	0.00302326	0.00204267
CHR6	89888676	+	T	C	GABRR1	E331G	0.083	0.6979	0.000457875	0.000348837	0.000226963
CHR17	28706173	+	T	A	CPD	Y59N	0.359	0.2462	0	0	0
CHR18	19231613	+	A	G	ABHD3	M390T	0.943	0.0081	0	0.000116279	0.000226963
CHR6	143816870	+	C	T	FUCA2	A460T	0.18	0.4544	0	0	0
CHR7	73249114	+	T	C	WBSCR27	T233A	0.328	0.2722	0	0	0
CHR3	9908941	+	T	C	CIDEC	R83G	0.043	0.8457	0	0.000465116	0
CHR7	150434690	+	G	A	GIMAP1-GIMAP5	R167H	0.058	0.7867	0.00228938	0	0
CHR20	62737365	+	T	G	NPBWR2	T274P	0.564	0.1326	0	0	0
CHR19	53571679	+	T	C	ZNF160	K703R	0.183	0.4487	0.000915751	0.00139535	0.000226963
CHR1	156776971	+	T	C	SH2D2A	*362W	0.995158	Readthrough	0	0	0
CHR7	39991072	+	G	A	CDK13	A278T	0.013	0.9623	0	0.000465116	0
CHR5	140626618	+	T	C	PCDHB15	L491P	0.821	0.0393	0	0.00406977	0.00068089
CHR7	120629916	+	A	G	CPED1	T81A	0.068	0.7491	0.000915751	0.00174419	0
CHRX	77224564	+	T	C	PGAM4	Q191R	0.087	0.6831	0	0	0
CHR16	70285400	+	C	G	EXOSC6	R135P	0.652	0.095	0	0	0
CHR1	176833486	+	C	G	ASTN1	R1273S	0.393	0.2221	0.000915751	0.000348837	0.000226963
CHR8	144993491	+	G	A	PLEC	R3468C	0.609	0.1131	0.000457875	0.00116279	0
CHR2	102014010	+	T	C	RFX8	*474W	0.991315	Readthrough	0	0	0
CHR20	3765819	+	C	T	CENPB	E438K	0.318	0.2814	0	0.00232558	0.000453926
CHR17	16527539	+	G	T	ZNF624	H221N	0.167	0.479	0	0	0
CHR3	98188439	+	A	C	OR5K1	T7P	0.517	0.1541	0	0	0
CHR6	22570499	+	A	T	HDGFL1	E232V	0.253	0.3491	0	0	0
CHR14	96001630	+	C	T	GLRX5	L7F	0.036	0.8723	0.00457875	0.00686047	0.000907853
CHR17	39305625	+	T	C	KRTAP4-5	H132R	0.076	0.7208	0	0	0
CHR10	99498296	+	C	T	ZFYVE27	A21V	0.012	0.9664	0.00412088	0.00662791	0.00204267
CHR16	71061495	+	A	G	HYDIN	*1018Q	0.4995	Readthrough	0	0	0
CHR12	132313119	+	T	C	MMP17	L27P	0.795	0.047	0	0	0
CHR16	136805	+	G	A	NPRL3	R357C	0.871	0.0251	0	0	0
CHRX	21675015	+	C	T	KLHL34	V298I	0.088	0.6797	0	0	0.000226963
CHR20	42935513	+	T	G	FITM2	S181R	0.132	0.5542	0	0	0
CHRX	140671952	+	G	C	SPANXA1	L68V	0.083	0.6979	0	0	0
CHR17	3628527	+	C	A	GSG2	P433Q	0.074	0.7279	0.000457875	0.000232558	0
CHR11	123624869	+	G	A	OR6X1	R120C	0.173	0.4675	0.00274725	0.000116279	0.00953246
CHR19	50412341	+	G	A	NUP62	P242S	0.051	0.8128	0	0	0
CHR14	93649650	+	A	C	MOAP1	L313R	0.359	0.2462	0.000457875	0	0
CHR16	16315673	+	C	T	ABCC6	E18K	0.533	0.1465	0	0	0
CHR8	27880851	+	G	C	NUGGC	P792A	0.143	0.5286	0	0.00104651	0.000226963
CHR19	36940823	+	T	C	ZNF566	M105V	0.353	0.2506	0	0	0
CHRX	49189246	+	C	T	GAGE13	R11W	0.385	0.227	0	0	0
CHR6	132030884	+	T	C	CTAGE9	H425R	0.06	0.7789	0	0	0
CHR17	39211100	+	A	T	KRTAP2-2	S122T	0.061	0.7753	0	0	0
CHR19	21990938	+	A	G	ZNF43	F569S	0.227	0.3805	0	0	0
CHR8	144993617	+	G	A	PLEC	R3426W	0.472	0.1764	0	0	0
CHR19	9721645	+	C	T	ZNF561	G231E	0.071	0.7386	0.000915751	0.000116279	0.000226963
CHR12	109186501	+	T	A	SSH1	D485V	0.656	0.0936	0.0018315	0.00267442	0.00068089
CHR14	31952318	+	A	C	GPR33	V285G	0.382	0.2287	0	0	0
CHR1	223284401	+	A	G	TLR5	L658P	0.862	0.0266	0	0	0
CHR1	2518274	+	G	T	FAM213B	A14S	0.011	0.9697	0	0.000232558	0
CHR1	220324715	+	T	C	RAB3GAP2	I1354V	0.155	0.5021	0.00274725	0.000348837	0.00363141
CHR1	149895835	+	A	G	SF3B4	S329P	0.64	0.0992	0	0.000348837	0
CHR2	167262592	+	C	T	SCN7A	R1516K	0.196	0.4266	0.00228938	0.00709302	0.00113482
CHR14	105417232	+	G	C	AHNAK2	S1519C	0.098	0.6453	0	0	0
CHR19	47725153	+	T	G	BBC3	H101P	0.565	0.1319	0	0	0
CHR11	5344779	+	T	A	OR51B2	Y250F	0.315	0.2842	0.000915751	0	0
CHR8	125463937	+	G	C	TRMT12	G257R	0.499	0.1632	0.00137363	0.00139535	0
CHR5	140480976	+	A	G	PCDHB3	E248G	0.553	0.137	0	0	0
CHR8	53852583	+	C	T	NPBWR1	A39V	0.457	0.1847	0.000457875	0.000348837	0.000226963
CHR7	57188576	+	A	C	ZNF479	N182K	0.022	0.9272	0	0	0
CHR1	161494896	+	G	A	HSPA6	A150T	0.546	0.1401	0	0	0
CHR6	46659379	+	G	C	TDRD6	V1172L	0.045	0.8373	0	0	0
CHR16	2510363	+	C	T	C16orf59	R36C	0.509	0.1576	0	0.00127907	0.000453926
CHR19	12126029	+	A	C	ZNF433	I551M	0.055	0.7986	0	0	0
CHR11	58347029	+	C	G	ZFP91	P92R	0.097	0.6485	0.00686813	0.00488372	0.00113482
CHR5	149546846	+	T	C	CDX1	M136T	0.624	0.1062	0	0	0
CHR14	105939784	+	G	A	CRIP2	S67N	0.028	0.9035	0	0	0
CHRX	135750210	+	C	T	ARHGEF6	S770N	0.074	0.7279	0	0.000116279	0
CHR7	100033795	+	T	C	PPP1R35	E68G	0.089	0.6759	0	0	0
CHR7	37960227	+	T	G	EPDR1	L16V	0.197	0.4247	0	0	0
CHR7	145813994	+	G	C	CNTNAP2	C9S	0.455	0.1856	0	0	0
CHR1	212799882	+	A	T	FAM71A	K555*	0.995158	Nonsense	0.00228938	0.00802326	0.00158874
CHR16	88782050	+	G	A	PIEZO1	P2510L	0.649	0.0962	0.00228938	0	0
CHR2	44040347	+	T	C	ABCG5	M622V	0.098	0.6453	0.00320513	0.00697674	0.00158874
CHR16	86612596	+	C	A	FOXL1	N89K	0.298	0.3003	0	0	0
CHR7	88423551	+	G	A	C7orf62	P236S	0.9	0.0177	0	0	0
CHR1	109794316	+	C	T	CELSR2	R539C	0.841	0.0326	0	0.000697674	0
CHR4	5527185	+	T	C	C4orf6	I43T	0.076	0.7208	0.0018315	0.00604651	0.000907853
CHR4	6718365	+	G	C	BLOC1S4	R143S	0.336	0.2642	0.00137363	0	0.00068089
CHR8	144995078	+	G	A	PLEC	R2939W	0.153	0.5065	0	0	0
CHR5	140594675	+	C	A	PCDHB13	T327N	0.038	0.8641	0.0018315	0.000232558	0.000907853
CHR14	21109505	+	G	T	OR6S1	L116M	0.416	0.2078	0.00412088	0.00976744	0.00158874
CHR2	179611789	+	G	A	TTN	A5113V	0.002	0.9979	0	0	0
CHR8	110588094	+	G	A	SYBU	R226W	0.59	0.1211	0	0.000813953	0
CHR14	20528772	+	T	C	OR4L1	I190T	0.072	0.7351	0	0.000465116	0
CHR11	48367424	+	C	G	OR4C45	S132T	0.06	0.7789	0	0	0
CHR16	89753161	+	T	G	CDK10	C15G	0.406	0.2139	0	0	0
CHR13	99337112	+	T	C	SLC15A1	I665V	0.131	0.5573	0.00137363	0.00732558	0.000907853
CHR10	99527605	+	C	T	SFRP5	R207H	0.63	0.1037	0	0.000116279	0.000226963
CHR1	205272901	+	C	T	NUAK2	G522S	0.381	0.2294	0.000457875	0	0.000226963
CHR1	156561938	+	C	A	APOA1BP	Y76*	0.995158	Nonsense	0	0	0
CHR10	126678112	+	T	C	CTBP2	N438S	0.149	0.5152	0	0	0
CHR7	128502963	+	C	G	ATP6V1F	A2G	0.42	0.2051	0	0	0
CHR6	168377274	+	G	A	HGC6.3	A20V	0.052	0.8093	0	0	0
CHR9	21202092	+	C	A	IFNA7	D25Y	0.392	0.2229	0.000457875	0.00139535	0
CHR1	152552228	+	C	T	LCE3D	R62Q	0.153	0.5065	0	0	0
CHR17	39253814	+	G	T	KRTAP4-8	P175T	0.35	0.2531	0	0	0
CHR12	6572006	+	G	A	VAMP1	R115W	0.037	0.8681	0.0018315	0.00511628	0.00068089
CHR17	74073386	+	C	G	GALR2	S346R	0.211	0.4035	0.00228938	0.00325581	0.000907853
CHR11	5221645	+	C	G	OR51V1	G96R	0.414	0.2092	0	0	0
CHR10	106401120	+	G	A	SORCS3	R12K	0.202	0.4165	0	0	0
CHR1	170501350	+	C	T	GORAB	R21W	0.212	0.402	0	0.000116279	0
CHR1	179851707	+	C	G	TOR1AIP1	P24A	0.534	0.1459	0.00228938	0.0022093	0.000226963
CHR8	37963172	+	T	G	ASH2L	V35G	0.225	0.3832	0	0	0
CHR11	6643694	+	C	G	DCHS1	Q3071H	0.346	0.2565	0	0	0
CHR8	8176548	+	G	A	SGK223	P1113S	0.471	0.177	0	0	0.000226963
CHR11	65810726	+	A	C	GAL3ST3	F183C	0.983	0.0008	0	0	0
CHR12	11214882	+	A	C	TAS2R46	F4L	0.031	0.8927	0	0	0
CHR3	195447901	+	C	G	MUC20	A8G	0.081	0.7044	0	0.00174419	0.000226963
CHR17	20483884	+	A	C	CDRT15L2	K230Q	0.077	0.7176	0	0	0
CHR6	86324535	+	T	C	SYNCRIP	Y569C	0.252	0.3501	0	0.000232558	0
CHR2	219941173	+	G	A	NHEJ1	T277I	0.051	0.8128	0	0.000116279	0
CHR9	41503461	+	T	C	SPATA31A7	F245L	0.099	0.6423	0	0	0
CHR19	1010755	+	G	A	TMEM259	S486L	0.046	0.8336	0.00961538	0.00802326	0.00590104
CHR19	23926839	+	A	G	ZNF681	S505P	0.086	0.6875	0	0	0
CHR18	73122809	+	G	A	C18orf62	T62M	0.053	0.8056	0	0	0
CHR1	185089186	+	C	T	TRMT1L	D567N	0.008	0.9807	0	0	0
CHR19	51506384	+	C	T	KLK9	E246K	0.287	0.3101	0	0.000348837	0
CHR17	42477272	+	C	T	GPATCH8	A725T	0.13	0.5596	0	0	0
CHR7	150028118	+	C	T	C7orf29	Q209*	0.995158	Nonsense	0.0018315	0.00395349	0.000226963
CHR11	4615462	+	G	C	OR52I1	C65S	0.154	0.5041	0	0.00337209	0.000453926
CHR11	5172996	+	C	T	OR52A1	G202S	0.527	0.1495	0	0	0
CHR1	158533358	+	C	T	OR6P1	V13I	0.117	0.5926	0	0	0
CHR6	166721587	+	C	G	PRR18	G15A	0.131	0.5573	0	0	0
CHR21	28210535	+	C	T	ADAMTS1	R756Q	0.912	0.0149	0.000457875	0.00523256	0.00204267
CHR21	46875677	+	G	A	COL18A1	G78D	0.161	0.4909	0	0	0
CHR17	76354859	+	G	T	SOCS3	S106R	0.412	0.2104	0	0	0
CHR5	141244168	+	C	G	PCDH1	E576D	0.048	0.825	0	0	0.000226963
CHR2	167055810	+	T	C	SCN9A	E1769G	0.937	0.0094	0	0	0
CHR8	146076611	+	C	T	COMMD5	R38Q	0.095	0.6554	0.00412088	0.00627907	0.00340445
CHR5	140530881	+	C	T	PCDHB6	S348L	0.505	0.1595	0	0	0
CHR19	33793214	+	C	T	CEBPA	G36D	0.115	0.5975	0	0	0
CHR13	25671214	+	T	G	PABPC3	V293G	0.165	0.4832	0	0	0
CHR19	13050026	+	A	G	CALR	Y57C	0.931	0.0107	0	0.000930233	0
CHR17	17104901	+	T	C	MPRIP	Y172H	0.025	0.9157	0.00595238	0	0
CHR22	50014245	+	T	A	C22orf34	T145S	0.006	0.9877	0	0	0
CHR9	121930416	+	C	T	DBC1	R411Q	0.834	0.035	0.000457875	0.00104651	0.00136178
CHR8	11991286	+	A	C	USP17L7	V78G	0.235	0.3702	0	0	0
CHR1	49193680	+	C	T	BEND5	D382N	0.111	0.6087	0	0.000116279	0
CHR8	89053706	+	T	C	MMP16	M603V	0.871	0.0251	0	0	0
CHRX	53263460	+	C	T	IQSEC2	A1470T	0.073	0.7315	0.00602773	0	0
CHR3	50334434	+	C	T	NAT6	R154H	0.93	0.0107	0	0	0
CHR9	125288719	+	G	A	OR1N1	P285L	0.594	0.1197	0	0	0
CHR8	143746135	+	T	A	JRK	E448V	0.248	0.3545	0	0	0
CHR4	126237864	+	A	G	FAT4	S100G	0.075	0.7247	0	0	0
CHR20	826144	+	T	C	FAM110A	S233P	0.885	0.0219	0	0	0
CHR16	21611112	+	A	T	METTL9	R20W	0.688	0.0809	0	0.00127907	0
CHR17	39221769	+	C	G	KRTAP2-4	R110P	0.675	0.0858	0	0	0
CHR19	10400759	+	G	A	ICAM5	G14S	0.375	0.2336	0	0.000232558	0
CHR22	28378351	+	C	T	TTC28	R2435H	0.07	0.7416	0.000915751	0.00174419	0.000226963
CHR11	108345575	+	C	G	KDELC2	K501N	0.055	0.7986	0.00457875	0.0022093	0.000453926
CHR8	145163051	+	C	T	KIAA1875	R68W	0.242	0.3613	0	0	0
CHR16	30899223	+	G	C	BCL7C	P206R	0.743	0.0631	0	0	0
CHR14	59931697	+	G	C	GPR135	A83G	0.11	0.612	0	0	0
CHR9	131071856	+	C	G	TRUB2	L323F	0.158	0.496	0.0018315	0.00744186	0
CHR7	27194595	+	G	C	HOXA7	A209G	0.088	0.6797	0	0	0
CHR19	12502314	+	C	T	ZNF799	E300K	0.353	0.2506	0	0.000116279	0
CHR22	41832844	+	C	T	TOB2	R169H	0.5	0.1627	0.000457875	0.00104651	0.000453926
CHR17	76374763	+	C	T	PGS1	A6V	0.355	0.2491	0	0.00581395	0.00068089
CHR7	57188241	+	T	C	ZNF479	E294G	0.213	0.4003	0	0	0
CHR4	135122024	+	G	T	PABPC4L	L109M	0.464	0.1808	0	0	0
CHR19	42595991	+	G	T	POU2F2	S495*	0.995158	Nonsense	0.00228938	0	0
CHR6	27776166	+	C	T	HIST1H2AI	T60I	0.897	0.0183	0	0	0
CHR17	36484369	+	C	T	GPR179	E1695K	0.194	0.4301	0	0.000116279	0.000453926
CHR5	72743919	+	G	T	FOXD1	P90Q	0.178	0.4581	0	0	0
CHR9	139934298	+	G	A	NPDC1	R302C	0.548	0.1389	0.000915751	0.00186047	0.00113482
CHR5	140745963	+	T	C	PCDHGA5	L689P	0.924	0.0119	0	0	0
CHR4	1388657	+	G	A	CRIPAK	V120M	0.134	0.5489	0	0	0
CHR11	4936515	+	G	A	OR51G2	R127C	0.594	0.1197	0	0	0.000226963
CHR10	119043816	+	C	T	PDZD8	E810K	0.459	0.1837	0	0	0
CHR17	57697502	+	A	T	CLTC	I4F	0.488	0.1677	0	0	0
CHR19	22575570	+	T	C	ZNF98	Y156C	0.171	0.471	0	0	0
CHR10	77158710	+	C	T	ZNF503	A580T	0.063	0.7674	0	0.000581395	0.000226963
CHR4	437909	+	T	C	ZNF721	K116R	0.111	0.6087	0.00549451	0.00825581	0.00158874
CHR6	90605513	+	T	A	GJA10	H442Q	0.064	0.7643	0.00228938	0.00976744	0.00068089
CHR5	180277308	+	T	C	ZFP62	D363G	0.506	0.1589	0	0	0
CHR19	13056833	+	C	T	RAD23A	T24M	0.361	0.2444	0	0	0
CHR9	34726620	+	T	G	FAM205A	Q206P	0.169	0.4752	0	0.000697674	0
CHR10	124753921	+	A	C	IKZF5	L212R	0.591	0.1207	0	0	0
CHRX	47919485	+	A	T	ZNF630	L102I	0.079	0.7114	0.00482218	0.00686047	0.000907853
CHR3	197677092	+	G	A	RPL35A	E1-	0.995158	Splice site	0	0	0
CHR5	140773461	+	C	G	PCDHGA8	L361V	0.096	0.6519	0	0.00162791	0.000226963
CHR3	182733233	+	G	A	MCCC1	S724L	0.289	0.308	0.000457875	0.000581395	0
CHR11	119206428	+	C	A	RNF26	A199D	0.658	0.0931	0	0	0
CHR20	36932647	+	G	A	BPI	A12T	0.095	0.6554	0.00824176	0.01	0.0043123
CHR11	3733840	+	G	A	NUP98	T899M	0.249	0.3533	0.000915751	0.00139535	0.000453926
CHR13	58208155	+	G	T	PCDH17	G492V	0.987	0.0005	0	0	0
CHR18	44543248	+	G	A	TCEB3CL2	P375L	0.124	0.5748	0	0	0
CHR19	19906097	+	C	G	ZNF506	R168P	0.043	0.8457	0	0	0
CHR1	152324257	+	G	C	FLG2	A2002G	0.042	0.8494	0	0	0
CHR6	30712202	+	C	T	IER3	G32S	0.414	0.2092	0	0.000930233	0.000226963
CHR15	41060197	+	C	G	DNAJC17	E286Q	0.502	0.1615	0	0.00139535	0
CHR1	248651927	+	A	G	OR2T5	K13R	0.052	0.8093	0	0	0
CHR11	123900640	+	A	G	OR10G8	H104R	0.66	0.0926	0	0	0
CHR1	151774888	+	G	T	LINGO4	T98N	0.078	0.7145	0.00320513	0.00767442	0.000907853
CHR4	53611450	+	C	T	ERVMER34-1	V80M	0.101	0.6371	0	0.000116279	0
CHR8	86573796	+	C	T	REXO1L1	S644N	0.034	0.8803	0	0	0
CHR16	33961539	+	A	C	LINC00273	L301R	0.131	0.5573	0	0	0
CHR19	9921669	+	T	G	FBXL12	E295A	0.468	0.1785	0	0	0
CHR13	23910487	+	C	T	SACS	A2510T	0.77	0.0545	0.000457875	0.00232558	0.000907853
CHR2	213872316	+	G	C	IKZF2	P424R	0.031	0.8927	0	0	0
CHR19	53770809	+	C	T	VN1R4	C37Y	0.123	0.5771	0	0	0
CHR12	118504457	+	T	C	VSIG10	D537G	0.15	0.5129	0.000457875	0.000465116	0.000226963
CHR22	17072411	+	G	T	CCT8L2	P344T	0.135	0.5464	0.00686813	0.00802326	0.00068089
CHR15	99645881	+	C	T	SYNM	A159V	0.096	0.6519	0	0	0
CHR5	140502740	+	A	C	PCDHB4	N387T	0.109	0.6146	0.0018315	0	0.00771675
CHR6	31867968	+	C	T	ZBTB12	S372N	0.059	0.7827	0	0	0
CHR3	73433060	+	A	G	PDZRN3	L886P	0.878	0.0234	0	0	0
CHR12	57849372	+	G	A	INHBE	R18Q	0.127	0.5673	0.000915751	0.00302326	0
CHR1	155911958	+	T	C	RXFP4	L153P	0.613	0.1112	0	0	0
CHR2	220283249	+	C	G	DES	P22R	0.369	0.238	0	0	0
CHR13	79176674	+	G	A	POU4F1	L46F	0.181	0.452	0.00274725	0.00546512	0.000453926
CHR1	45793667	+	C	T	HPDL	P283S	0.353	0.2506	0	0	0
CHR16	27078327	+	C	T	C16orf82	P4L	0.413	0.2098	0	0.000465116	0
CHR17	39253953	+	G	T	KRTAP4-8	S128R	0.228	0.3792	0	0	0
CHR6	132860071	+	T	A	TAAR9	F215I	0.168	0.4771	0.00137363	0.005	0.000226963
CHR8	144943680	+	C	A	EPPK1	V1248L	0.224	0.3847	0	0	0
CHR11	5080289	+	G	A	OR52E2	S190F	0.657	0.0934	0	0	0
CHR17	76888360	+	A	G	LOC100653515	W18R	0.035	0.8761	0.00412088	0	0
CHR2	74425769	+	A	G	MTHFD2	M1V	0.97	0.003	0.000457875	0	0
CHR7	143270163	+	G	A	CTAGE15	R418K	0.082	0.7012	0	0	0
CHR11	65547738	+	T	C	AP5B1	T76A	0.113	0.6033	0.0018315	0.00162791	0.000226963
CHR6	30131723	+	G	A	TRIM15	E88K	0.479	0.1722	0	0	0
CHR19	9524453	+	T	C	ZNF266	K383R	0.067	0.7529	0	0	0
CHRX	3229069	+	G	A	MXRA5	S2392F	0.417	0.2074	0	0	0
CHR21	31852456	+	C	T	KRTAP19-1	G61S	0.454	0.1861	0	0	0
CHR11	36615697	+	C	T	RAG2	V8I	0.119	0.587	0.000457875	0.00418605	0.000226963
CHR5	53814515	+	C	G	SNX18	L245V	0.426	0.2017	0	0	0
CHR19	49564992	+	G	A	NTF4	A88V	0.712	0.0726	0.0018315	0.00313953	0.000453926
CHR15	101109904	+	T	C	LINS	M605V	0.242	0.3613	0.00228938	0.00418605	0.00068089
CHR19	4817434	+	A	G	TICAM1	L319P	0.047	0.8299	0	0.000116279	0
CHR14	102027868	+	G	A	DIO3	G12E	0.204	0.4134	0	0.00430233	0.000226963
CHR1	1354756	+	G	A	ANKRD65	T128M	0.057	0.7911	0	0	0
CHR11	71293436	+	C	T	KRTAP5-11	V150M	0.102	0.6344	0	0	0.000453926
CHR3	33194757	+	T	C	SUSD5	E456G	0.327	0.2731	0.00137363	0.00313953	0.00068089
CHR9	111625336	+	C	T	ACTL7A	A245V	0.796	0.0466	0	0.000465116	0
CHRX	1505637	+	G	A	SLC25A6	T252M	0.306	0.2926	0	0	0
CHR11	6129082	+	G	A	OR56B4	G25D	0.457	0.1847	0.00137363	0.00662791	0.000907853
CHR7	130038769	+	A	G	CEP41	L274P	0.105	0.6254	0	0	0
CHR4	265177	+	T	C	ZNF732	N489S	0.21	0.4047	0	0	0
CHR6	31079232	+	G	A	C6orf15	R302C	0.314	0.2851	0	0	0.000453926
CHR17	46799231	+	C	T	PRAC	E36K	0.1	0.6398	0	0	0
CHR2	178096694	+	C	T	NFE2L2	V190I	0.058	0.7867	0	0.000116279	0
CHR19	52537202	+	C	T	ZNF432	G577D	0.365	0.2412	0.00137363	0.00604651	0.00113482
CHR1	1139308	+	G	A	TNFRSF18	T144M	0.027	0.9076	0	0.000348837	0
CHR19	56127663	+	G	C	ZNF865	Q893H	0.385	0.227	0	0	0
CHR8	81889077	+	A	T	PAG1	L334H	0.304	0.2943	0	0	0
CHR17	36484564	+	C	G	GPR179	E1630Q	0.043	0.8457	0.00274725	0.00732558	0.00113482
CHR19	59009901	+	T	C	SLC27A5	E685G	0.25	0.3524	0	0	0
CHR6	132891756	+	A	G	TAAR6	Y99C	0.839	0.0336	0.0018315	0.00534884	0.00136178
CHR5	2752398	+	G	A	C5orf38	R7Q	0.176	0.4617	0.00137363	0	0
CHR9	43625019	+	T	C	SPATA31A6	H1223R	0.029	0.9003	0	0	0
CHR3	75787829	+	C	G	ZNF717	W315C	0.477	0.1735	0	0	0
CHR21	31874363	+	C	T	KRTAP19-5	G16R	0.231	0.3758	0	0	0
CHR22	20229481	+	T	G	RTN4R	E392A	0.301	0.2976	0	0	0
CHR7	127668978	+	G	C	LRRC4	D572E	0.439	0.1943	0.00137363	0.000697674	0
CHR3	5164024	+	G	C	ARL8B	V16L	0.049	0.8211	0	0	0
CHR3	75788200	+	G	A	ZNF717	H192Y	0.289	0.308	0	0	0
CHR11	62623788	+	C	T	SLC3A2	P16L	0.074	0.7279	0	0.000116279	0
CHR2	210867429	+	A	G	RPE	D15G	0.989	0.0002	0.00137363	0.00104651	0.000226963
CHR2	64863751	+	C	T	SERTAD2	M85I	0.081	0.7044	0.00412088	0.00802326	0.00068089
CHR8	144940659	+	G	A	EPPK1	R2255W	0.765	0.0561	0	0.000116279	0.000453926
CHR8	143746132	+	C	G	JRK	G449A	0.046	0.8336	0	0	0
CHR16	33961567	+	A	G	LINC00273	C292R	0.194	0.4301	0	0	0
CHR1	6585940	+	G	A	NOL9	P695S	0.206	0.4105	0.000457875	0	0
CHR1	52082756	+	C	T	OSBPL9	R10C	0.579	0.1258	0.000915751	0.000697674	0.000453926
CHR14	81737211	+	C	A	STON2	G806C	0.666	0.0899	0	0.000116279	0
CHR15	43525542	+	G	T	TGM5	F588L	0.026	0.9116	0	0.000348837	0.000226963
CHR3	98110305	+	G	C	OR5K3	G266R	0.208	0.4073	0	0	0
CHR5	176308695	+	T	G	HK3	E797D	0.671	0.0877	0	0	0
CHR2	44548544	+	A	T	PREPL	L623H	0.815	0.0409	0	0	0
CHRX	47917867	+	T	C	ZNF630	Y641C	0.053	0.8056	0	0	0
CHR19	49622210	+	C	T	C19orf73	V24M	0.534	0.1459	0.00137363	0.0072093	0.000907853
CHR15	22383358	+	A	G	OR4N4	T296A	0.064	0.7643	0	0	0
CHR3	130279229	+	C	G	COL6A6	F7L	0.086	0.6875	0	0.000348837	0.000226963
CHR7	92764069	+	G	A	SAMD9L	R406*	0.991315	Nonsense	0	0.00151163	0
CHR11	48367133	+	C	A	OR4C45	R229L	0.029	0.9003	0	0	0
CHR10	89120394	+	A	C	FAM22D	N108T	0.049	0.8211	0	0	0
CHR13	25671027	+	A	G	PABPC3	K231E	0.44	0.1936	0	0	0
CHR11	73388956	+	C	G	RAB6A	G101A	0.272	0.3263	0.0018315	0.00430233	0
CHR18	657755	+	G	A	TYMS	G5S	0.331	0.269	0	0	0
CHR5	180622354	+	G	A	TRIM7	R242W	0.39	0.2242	0.00549451	0.00453488	0.00158874
CHR6	30514529	+	G	A	GNL1	A509V	0.458	0.1844	0	0.00302326	0.000226963
CHR2	176987668	+	G	A	HOXD9	A58T	0.136	0.5441	0	0	0
CHR17	16120650	+	T	A	PIGL	L37Q	0.194	0.4301	0	0	0
CHR20	23029451	+	C	G	THBD	V231L	0.066	0.7568	0	0	0
CHR1	40092227	+	C	T	HEYL	M313I	0.095	0.6554	0.003663	0.00151163	0.00068089
CHR3	15469383	+	A	G	EAF1	I33V	0.293	0.3044	0.00274725	0.00313953	0.00068089
CHR11	13031880	+	A	G	RASSF10	I253V	0.594	0.1197	0	0.00174419	0.000453926
CHR6	142397005	+	C	T	NMBR	C318Y	0.987	0.0005	0.00274725	0.0027907	0.000453926
CHR16	71061513	+	T	C	HYDIN	T1012A	0.101	0.6371	0	0	0
CHR16	33961819	+	T	C	LINC00273	R208G	0.071	0.7386	0	0	0
CHR7	1097155	+	T	G	GPR146	W2G	0.724	0.0685	0	0	0
CHR12	53162655	+	C	T	KRT76	G587S	0.089	0.6759	0.000915751	0.00430233	0.00068089
CHR2	27601034	+	A	G	ZNF513	M273T	0.237	0.3679	0	0	0
CHR5	140176629	+	G	A	PCDHA2	V694M	0.345	0.2574	0	0.00360465	0.000907853
CHR2	160661610	+	C	G	LY75	R1705P	0.873	0.0245	0.00137363	0.00151163	0
CHR1	120438295	+	T	C	ADAM30	N222S	0.074	0.7279	0.00137363	0.00197674	0.000907853
CHR18	74962971	+	T	G	GALR1	V156G	0.775	0.053	0	0	0
CHR1	152189153	+	C	G	HRNR	S1651T	0.179	0.4564	0	0	0
CHR20	48522545	+	A	G	SPATA2	S392P	0.451	0.1879	0	0	0
CHR8	145948061	+	T	A	ZNF251	R328S	0.255	0.3466	0	0.000116279	0
CHR1	109793077	+	C	A	CELSR2	Q126K	0.391	0.2237	0.00228938	0.00593023	0.00068089
CHR6	64430500	+	C	T	EYS	V3143I	0.138	0.5394	0	0	0
CHR19	4174758	+	G	C	SIRT6	N281K	0.087	0.6831	0	0	0
CHR11	7982357	+	T	C	NLRP10	S268G	0.236	0.3691	0	0	0
CHR1	152192394	+	G	A	HRNR	R571C	0.15	0.5129	0	0	0
CHR9	41321624	+	C	T	SPATA31A7	R1227H	0.065	0.7605	0	0	0
CHR11	65819926	+	A	G	SF3B2	Y24C	0.815	0.0409	0	0	0
CHR11	124095977	+	C	T	OR8G2	L194F	0.008	0.9807	0	0	0
CHR6	28964325	+	T	C	ZNF311	S152G	0.069	0.7455	0	0	0
CHR15	101420155	+	A	G	ALDH1A3	R15G	0.056	0.7946	0	0.00313953	0.000907853
CHR19	59073543	+	G	A	MZF1	R701C	0.62	0.1082	0	0	0
CHR3	75787840	+	C	A	ZNF717	A312S	0.35	0.2531	0	0	0
CHR16	90095605	+	C	G	C16orf3	G49A	0.031	0.8927	0	0	0
CHR19	5904950	+	G	A	VMAC	A17T	0.285	0.3124	0	0	0
CHR13	26788880	+	T	G	RNF6	E380A	0.272	0.3263	0	0	0
CHR10	101542629	+	T	G	ABCC2	F10V	0.812	0.042	0	0	0
CHR13	99337087	+	A	T	SLC15A1	I673N	0.233	0.373	0	0	0
CHR21	44474013	+	C	T	CBS	A545T	0.065	0.7605	0	0	0
CHR12	109182071	+	G	T	SSH1	P948H	0.408	0.2129	0	0.000348837	0.000226963
CHR1	152280900	+	T	G	FLG	Q2154H	0.053	0.8056	0	0	0
CHR17	80280213	+	C	A	SECTM1	V191F	0.126	0.5694	0.00457875	0.00662791	0.00113482
CHR5	72469919	+	C	T	TMEM174	T220I	0.131	0.5573	0.000457875	0.000116279	0
CHR17	39305619	+	G	T	KRTAP4-5	S134Y	0.446	0.1907	0	0	0
CHR2	202352363	+	C	T	ALS2CR11	R615Q	0.097	0.6485	0.000915751	0.00186047	0.00068089
CHR17	72858956	+	G	A	FDXR	R435C	0.065	0.7605	0	0.000465116	0
CHR1	186345106	+	G	C	C1orf27	E1-	0.995158	Splice site	0	0	0
CHR20	62705229	+	A	G	RGS19	S211P	0.124	0.5748	0	0	0
CHR9	73151092	+	C	T	TRPM3	R1471H	0.382	0.2287	0.000457875	0.000116279	0
CHR8	145579689	+	A	G	FBXL6	S465P	0.075	0.7247	0	0	0
CHR6	121402024	+	G	A	C6orf170	H1223Y	0.306	0.2926	0	0.00209302	0.000226963
CHR7	97846705	+	G	T	TECPR1	C1165*	0.995158	Nonsense	0	0	0
CHR6	31867984	+	G	C	ZBTB12	Q367E	0.195	0.4284	0	0	0
CHR11	124637239	+	C	T	MSANTD2	V453I	0.062	0.7715	0.000915751	0	0
CHR17	7366530	+	C	A	ZBTB4	G591C	0.525	0.1501	0	0	0
CHR14	68086741	+	A	G	ARG2	H16R	0.088	0.6797	0.0018315	0.0077907	0.000453926
CHR6	29407800	+	C	A	OR10C1	A3E	0.148	0.5176	0.00641026	0.005	0.00068089
CHR19	22155980	+	C	A	ZNF208	S619I	0.01	0.9729	0	0	0
CHR2	157182301	+	C	T	NR4A2	A487T	0.046	0.8336	0	0	0
CHR11	89819194	+	G	T	UBTFL1	R26L	0.078	0.7145	0	0	0
CHR11	1605919	+	G	T	KRTAP5-1	C187*	0.991315	Nonsense	0	0.00302326	0.000453926
CHR7	143882702	+	C	A	CTAGE4	S702R	0.08	0.7078	0	0	0
CHR12	109577516	+	C	A	ACACB	N102K	0.085	0.6913	0	0.000232558	0
CHR19	2291460	+	C	A	LINGO3	V106F	0.168	0.4771	0	0	0
CHR1	158369138	+	A	G	OR10T2	L40P	0.782	0.0505	0	0.000348837	0.000226963
CHR3	97888177	+	G	A	OR5H15	V212M	0.062	0.7715	0	0.00139535	0
CHR11	58979891	+	C	T	MPEG1	V150I	0.396	0.2204	0	0.000930233	0.000226963
CHR17	39262166	+	G	C	KRTAP4-9	V176L	0.078	0.7145	0	0	0
CHR6	31105928	+	G	A	PSORS1C2	R71C	0.364	0.2419	0.00274725	0.00139535	0.000453926
CHR21	31655108	+	G	A	KRTAP24-1	P48L	0.783	0.0503	0	0.000465116	0.00068089
CHR19	51728815	+	T	C	CD33	Y127H	0.277	0.3201	0.00549451	0.00197674	0.000907853
CHR4	17805169	+	T	G	DCAF16	Y199S	0.672	0.0873	0	0	0
CHR8	26365727	+	T	C	PNMA2	E182G	0.829	0.0368	0	0	0
CHR7	150434689	+	C	T	GIMAP1-GIMAP5	R167C	0.236	0.3691	0.00824176	0	0
CHR1	13716903	+	T	A	PRAMEF17	S130R	0.232	0.3744	0	0	0
CHR19	38055730	+	G	A	ZNF571	Q534*	0.995158	Nonsense	0.00274725	0.00453488	0.000453926
CHR4	493148	+	C	G	PIGG	F8L	0.555	0.136	0	0.000930233	0
CHR5	79854935	+	T	C	ANKRD34B	T302A	0.108	0.6173	0.00228938	0.0094186	0.00204267
CHR1	207818579	+	A	G	CR1L	M1V	0.164	0.485	0	0.000116279	0
CHR19	38056210	+	G	A	ZNF571	R374C	0.101	0.6371	0	0.000697674	0
CHR16	1820684	+	C	T	NME3	W159*	0.995158	Nonsense	0	0	0
CHR15	22382475	+	G	A	OR4N4	M1I	0.835	0.0347	0	0	0
CHR3	9792059	+	G	T	OGG1	A10S	0.261	0.3392	0	0	0
CHR22	37887414	+	G	A	CARD10	P961L	0.267	0.3322	0	0	0
CHR14	24775707	+	T	C	CIDEB	N70S	0.021	0.9306	0	0	0
CHR9	95610312	+	A	G	ZNF484	F217L	0.318	0.2814	0.00320513	0.00186047	0.000453926
CHR6	116574001	+	G	A	TSPYL4	P391S	0.077	0.7176	0	0	0
CHRX	34148825	+	G	A	FAM47A	T524I	0.104	0.6278	0	0	0
CHR15	75968547	+	C	T	CSPG4	G2105R	0.069	0.7455	0	0.000581395	0
CHR10	859047	+	C	A	LARP4B	C679F	0.475	0.1745	0.0018315	0.00244186	0
CHR11	33163518	+	G	A	CSTF3	S49F	0.027	0.9076	0	0.000116279	0
CHR11	48367098	+	T	A	OR4C45	I241F	0.051	0.8128	0	0.000116279	0.00181571
CHR9	5231539	+	C	T	INSL4	R6W	0.142	0.5303	0.000457875	0.00151163	0
CHR7	57187788	+	G	A	ZNF479	A445V	0.069	0.7455	0	0	0
CHR2	210887737	+	G	A	KANSL1L	S967L	0.09	0.6726	0.000915751	0.00209302	0
CHR4	155156598	+	G	A	DCHS2	P2614L	0.18	0.4544	0.0018315	0.00139535	0
CHR5	132535220	+	C	T	FSTL4	R699H	0.115	0.5975	0	0	0
CHR15	101853396	+	A	C	PCSK6	C948G	0.071	0.7386	0	0.000581395	0
CHR18	73122857	+	G	A	SMIM21	R90C	0.118	0.5898	0	0	0
CHR19	36674347	+	T	C	ZNF565	K174R	0.106	0.6225	0.00274725	0	0
CHR21	45994024	+	G	C	KRTAP10-4	C130S	0.09	0.6726	0	0	0
CHR3	75786381	+	T	C	ZNF717	K798R	0.367	0.2397	0	0	0
CHR22	30770021	+	G	A	CCDC157	R538Q	0.185	0.4453	0.000915751	0.000116279	0
CHR10	50667120	+	T	G	ERCC6	E1408A	0.24	0.364	0.000457875	0.00174419	0.000907853
CHR16	3350332	+	C	T	TIGD7	G95S	0.544	0.1412	0	0	0.000226963
CHR2	145146449	+	C	T	ZEB2	G194E	0.098	0.6453	0	0	0
CHR1	151735493	+	C	T	MRPL9	E95K	0.855	0.0288	0	0.00383721	0.00158874
CHR8	144662301	+	C	G	EEF1D	A206P	0.028	0.9035	0	0	0
CHR1	153066098	+	G	A	SPRR2E	P44S	0.235	0.3702	0.00274725	0	0
CHR9	136230335	+	G	A	SURF4	R162C	0.162	0.489	0	0	0
CHR13	49281962	+	A	G	CYSLTR2	S337G	0.247	0.3555	0	0	0
CHR7	92735154	+	G	A	SAMD9	S86F	0.112	0.6061	0.00641026	0.00674419	0.00158874
CHR9	22447183	+	G	A	DMRTA1	G40E	0.222	0.3873	0	0	0
CHR11	4944666	+	G	A	OR51G1	R302C	0.729	0.0669	0.0018315	0.00465116	0.000907853
CHR14	93408077	+	G	T	ITPK1	S358R	0.221	0.3888	0	0	0
CHR7	44040797	+	C	T	SPDYE1	T58M	0.09	0.6726	0	0	0
CHR6	116574801	+	C	T	TSPYL4	G124D	0.135	0.5464	0	0	0
CHR20	32264941	+	G	A	E2F1	P346S	0.09	0.6726	0	0.00116279	0
CHR11	74203256	+	T	A	LIPT2	E207V	0.731	0.0664	0.00228938	0.000930233	0
CHR22	41257815	+	G	A	DNAJB7	R62W	0.877	0.0236	0.000915751	0.00244186	0.00113482
CHR4	175413228	+	T	C	HPGD	N106S	0.015	0.9542	0.003663	0	0
CHR3	32737239	+	C	T	CNOT10	S41L	0.392	0.2229	0.000915751	0	0
CHR17	44372673	+	G	C	LRRC37A	E58D	0.083	0.6979	0	0	0
CHR6	135358552	+	T	C	HBS1L	N348S	0.003	0.9958	0	0	0
CHR6	18122245	+	A	G	NHLRC1	I198T	0.598	0.1178	0	0	0
CHR10	105005814	+	G	A	LOC729020	A21T	0.027	0.9076	0.000457875	0	0
CHR19	12502155	+	T	G	ZNF799	K353Q	0.075	0.7247	0	0	0
CHR12	111800893	+	G	A	FAM109A	S94L	0.042	0.8494	0	0.000232558	0
CHR5	134364801	+	T	G	PITX1	M205L	0.651	0.0954	0	0.000232558	0
CHR12	117348899	+	G	T	FBXW8	Q19H	0.057	0.7911	0	0	0
CHR10	38241260	+	T	C	ZNF25	Q389R	0.137	0.5415	0	0	0
CHR12	2936373	+	T	C	NRIP2	*282W	0.995158	Readthrough	0	0	0
CHR1	109191520	+	C	T	HENMT1	V284M	0.069	0.7455	0	0	0
CHR16	28855318	+	T	G	TUFM	M343L	0.471	0.177	0	0	0
CHR8	67341739	+	C	T	RRS1	P125S	0.268	0.3308	0	0	0
CHR2	105858691	+	C	G	GPR45	L126V	0.318	0.2814	0	0	0
CHR11	6942915	+	C	T	OR2D3	S228F	0.206	0.4105	0.00228938	0.00988372	0.00204267
CHR17	3572612	+	G	T	EMC6	A58S	0.296	0.3022	0	0	0
CHR8	124195352	+	G	T	FAM83A	G86*	0.987473	Nonsense	0.0018315	0.0055814	0.000226963
CHR9	125133518	+	G	A	PTGS1	V21I	0.099	0.6423	0	0	0
CHR4	71555595	+	G	A	UTP3	A401T	0.153	0.5065	0	0.000232558	0
CHR15	31775732	+	T	G	OTUD7A	Q849P	0.428	0.2007	0	0	0
CHR17	18566248	+	C	T	ZNF286B	E191K	0.15	0.5129	0	0	0
CHR16	15131989	+	G	A	NTAN1	H173Y	0.17	0.4728	0	0	0
CHR1	152277014	+	A	G	FLG	Y3450H	0.159	0.4942	0	0	0
CHR1	89449483	+	C	G	RBMXL1	K9N	0.164	0.485	0	0	0
CHR19	57328915	+	T	G	PEG3	T173P	0.141	0.5326	0	0	0
CHR1	26150160	+	C	T	FAM54B	H46Y	0.03	0.8968	0	0.000348837	0
CHR16	89985778	+	G	A	MC1R	V38M	0.696	0.0781	0	0.000581395	0.000453926
CHR5	180630588	+	T	C	TRIM7	E192G	0.589	0.1214	0	0	0
CHR11	85396940	+	G	T	CCDC89	C78*	0.995158	Nonsense	0	0.000930233	0
CHR13	46917592	+	G	A	KIAA0226L	P588L	0.014	0.9588	0	0.000116279	0.000226963
CHR1	152084708	+	C	T	TCHH	E329K	0.205	0.4119	0	0	0
CHR17	2290779	+	C	T	MNT	V389M	0.162	0.489	0	0	0
CHR1	43201474	+	G	C	CLDN19	Q206E	0.05	0.8172	0	0	0
CHR2	176972115	+	C	A	HOXD11	A11E	0.56	0.1344	0	0.000348837	0
CHR22	18561272	+	C	T	PEX26	L44F	0.022	0.9272	0.00320513	0.00116279	0.00635497
CHRX	75650278	+	A	G	MAGEE1	E652G	0.824	0.0383	0	0	0
CHR17	4805355	+	G	C	CHRNE	Y124*	0.995158	Nonsense	0	0	0
CHR7	143882697	+	A	G	CTAGE4	I701V	0.086	0.6875	0	0	0
CHR1	152084606	+	G	T	TCHH	Q363K	0.123	0.5771	0	0	0
CHR6	22570483	+	G	A	HDGFL1	E227K	0.19	0.4361	0	0.000348837	0
CHR1	152080457	+	A	C	TCHH	Y1746D	0.082	0.7012	0	0	0
CHR1	54605666	+	A	G	CDCP2	Y293H	0.315	0.2842	0	0.000348837	0
CHR19	46002007	+	C	T	PPM1N	P93S	0.228	0.3792	0.00457875	0.005	0.000907853
CHR16	86602272	+	A	G	FOXC2	Q444R	0.758	0.0581	0	0.00139535	0.000226963
CHRX	135956506	+	C	G	RBMX	R324P	0.87	0.0253	0	0	0
CHR7	90894337	+	C	T	FZD1	P48S	0.065	0.7605	0	0	0
CHR1	152800103	+	G	T	LCE1A	C52F	0.639	0.0997	0	0	0
CHR1	6521601	+	G	A	TNFRSF25	R200C	0.106	0.6225	0	0	0
CHR10	102988538	+	C	T	LBX1	G12E	0.252	0.3501	0	0	0
CHR5	140751489	+	C	T	PCDHGB3	R510W	0.242	0.3613	0	0.000232558	0
CHR17	3030413	+	C	T	OR1G1	V145M	0.352	0.2514	0.000915751	0	0.00181571
CHR12	12509879	+	G	A	LOH12CR2	A41V	0.002	0.9979	0.00137363	0	0
CHR1	209956195	+	A	G	C1orf74	V262A	0.675	0.0858	0	0	0
CHR11	55703411	+	T	C	OR5I1	M156V	0.196	0.4266	0.000457875	0.000930233	0.000453926
CHR7	6049103	+	C	A	AIMP2	P37T	0.13	0.5596	0	0	0
CHR17	39880957	+	C	T	HAP1	R594Q	0.059	0.7827	0	0	0
CHR14	58030899	+	C	T	SLC35F4	R470Q	0.308	0.2908	0	0	0
CHR16	11773132	+	C	G	TXNDC11	Q932H	0.056	0.7946	0	0.00395349	0.000453926
CHR3	122247435	+	G	A	PARP9	P746S	0.162	0.489	0.00137363	0.000813953	0
CHR4	16165136	+	G	A	TAPT1	S500F	0.27	0.3287	0	0.000465116	0.000226963
CHR17	39680396	+	A	C	KRT19	M316R	0.372	0.2357	0	0.0022093	0.000453926
CHR10	89621853	+	T	C	KLLN	N131S	0.011	0.9697	0.00503663	0.000813953	0.00158874
CHR7	5920569	+	C	T	OCM	Q17*	0.983631	Nonsense	0.0018315	0.00511628	0.000453926
CHR5	140754570	+	T	C	PCDHGA6	L307P	0.887	0.0212	0	0	0.000226963
CHR22	23915753	+	G	C	IGLL1	L76V	0.014	0.9588	0	0.00104651	0.000226963
CHR2	97527138	+	G	C	SEMA4C	P576R	0.816	0.0408	0	0.000232558	0.000226963
CHR8	145748173	+	C	T	LRRC24	A410T	0.252	0.3501	0	0.00174419	0.000907853
CHR3	133119364	+	G	T	BFSP2	R146L	0.232	0.3744	0	0.000232558	0
CHR1	155912051	+	A	G	RXFP4	E184G	0.223	0.3863	0	0	0
CHR15	56388668	+	C	T	RFX7	G420S	0.256	0.3454	0	0.000232558	0
CHR6	89856030	+	A	C	PM20D2	H56P	0.648	0.0964	0	0	0
CHR13	23910429	+	G	C	SACS	T2529S	0.741	0.0635	0	0	0
CHR19	23836347	+	T	C	ZNF675	Q463R	0.087	0.6831	0	0	0.000226963
CHR5	138729991	+	G	C	PROB1	S260R	0.172	0.4692	0	0	0
CHR4	38799409	+	G	T	TLR1	S348R	0.823	0.0386	0	0	0
CHR3	38739975	+	C	T	SCN10A	R1579Q	0.933	0.0103	0	0	0
CHR19	51274395	+	C	T	GPR32	R180W	0.204	0.4134	0	0.000465116	0
CHR8	57354047	+	G	C	PENK	S196R	0.67	0.0882	0.000457875	0.00162791	0
CHR19	12460517	+	A	T	ZNF442	*628K	0.991315	Readthrough	0.000915751	0.00116279	0.000226963
CHR17	18539858	+	T	C	TBC1D28	S184G	0.107	0.6201	0	0	0
CHR3	121351016	+	G	A	HCLS1	P419L	0.185	0.4453	0.000457875	0.00127907	0.000907853
CHR9	90744782	+	G	A	SPATA31C2	T1057I	0.104	0.6278	0	0	0
CHR11	4976264	+	G	A	OR51A2	P227L	0.154	0.5041	0.00686813	0	0
CHR11	92703070	+	T	G	MTNR1B	L60R	0.803	0.0444	0	0.000581395	0
CHR2	176988059	+	C	A	HOXD9	S188Y	0.172	0.4692	0.003663	0.00976744	0.00136178
CHR17	72733442	+	C	T	RAB37	R11W	0.071	0.7386	0	0	0
CHR19	11485424	+	C	T	SWSAP1	P2L	0.108	0.6173	0	0	0
CHR11	792635	+	T	A	SLC25A22	T169S	0.344	0.2582	0	0	0
CHR19	14165924	+	T	C	PALM3	Q172R	0.038	0.8641	0	0	0
CHRX	151935332	+	C	T	MAGEA3	V279I	0.127	0.5673	0.00421941	0.000465116	0
CHR1	12907457	+	A	G	HNRNPCL1	M229T	0.12	0.5844	0	0	0
CHR7	91503684	+	G	A	MTERF	R142W	0.905	0.0164	0	0	0
CHR21	36042612	+	G	A	CLIC6	E309K	0.024	0.9193	0	0	0
CHR5	140235714	+	C	A	PCDHA10	S27R	0.545	0.1407	0.00228938	0.00313953	0.000453926
CHR6	132031226	+	G	A	CTAGE9	P311L	0.166	0.4807	0	0	0
CHR1	248309107	+	C	G	OR2M5	R220G	0.155	0.5021	0	0.00197674	0.000453926
CHR11	67219621	+	G	C	GPR152	S192W	0.396	0.2204	0	0	0
CHR19	11685839	+	G	A	ACP5	R322*	0.995158	Nonsense	0	0.000232558	0.000226963
CHR11	5862872	+	T	C	OR52E6	I86V	0.146	0.5218	0.000457875	0.00139535	0.000226963
CHR11	48367155	+	T	A	OR4C45	T222S	0.015	0.9542	0	0	0
CHR7	57187872	+	A	G	ZNF479	V417A	0.043	0.8457	0	0	0
CHR12	6976702	+	C	G	TPI1	T28S	0.133	0.5515	0.000915751	0.000465116	0
CHR20	30449321	+	T	G	DUSP15	Q95P	0.219	0.3916	0	0	0
CHR15	23892363	+	C	T	MAGEL2	G176E	0.357	0.2476	0	0	0
CHR3	75786916	+	C	A	ZNF717	E620*	0.983631	Nonsense	0	0	0
CHR3	178957851	+	C	T	KCNMB3	R152H	0.04	0.8573	0	0	0
CHR5	133644012	+	A	G	CDKL3	M394T	0.051	0.8128	0	0.00197674	0.00068089
CHR17	17715321	+	A	G	SREBF1	L1051P	0.06	0.7789	0	0	0
CHR8	116427121	+	G	C	TRPS1	H1005Q	0.771	0.0542	0	0.000697674	0
CHR11	5221008	+	A	C	OR51V1	I308S	0.862	0.0266	0.000915751	0.00186047	0
CHR9	99580527	+	T	C	ZNF782	E593G	0.21	0.4047	0	0	0
CHR3	197238857	+	C	T	BDH1	R314H	0.685	0.082	0	0.00151163	0.000226963
CHR2	47596649	+	C	T	EPCAM	A2V	0.495	0.1649	0	0.00162791	0.000907853
CHR4	7043618	+	C	G	CCDC96	G350R	0.582	0.1243	0	0	0
CHR21	45993673	+	G	A	KRTAP10-4	R13H	0.238	0.3664	0	0.000697674	0
CHR6	150005429	+	G	C	LATS1	P266A	0.265	0.3348	0	0.0027907	0.00068089
CHR1	39340381	+	A	G	GJA9	S464P	0.039	0.8605	0.00228938	0.00639535	0.00136178
CHR10	79397370	+	T	C	KCNMA1	S11G	0.331	0.269	0	0	0
CHR2	198571370	+	G	T	MARS2	R414I	0.489	0.1672	0	0.000465116	0.000226963
CHR2	46739516	+	T	C	ATP6V1E2	Y112C	0.956	0.0056	0	0	0
CHR7	141464348	+	G	A	TAS2R3	M130I	0.064	0.7643	0.000457875	0.00151163	0.000453926
CHR2	29416698	+	C	T	ALK	E1419K	0.452	0.1875	0.000457875	0.00174419	0
CHR1	152285369	+	C	T	FLG	E665K	0.214	0.3991	0	0.00395349	0.000907853
CHR4	89618479	+	C	T	NAP1L5	E143K	0.252	0.3501	0.0018315	0	0
CHR6	109765478	+	C	A	MICAL1	L954F	0.053	0.8056	0	0.000116279	0
CHR11	4976145	+	C	G	OR51A2	G267R	0.068	0.7491	0	0	0
CHR7	140373540	+	C	T	ADCK2	A137V	0.244	0.359	0.000915751	0.00337209	0.000226963
CHR11	4567362	+	G	A	OR52M1	M314I	0.072	0.7351	0	0	0
CHR18	56936310	+	T	C	RAX	S323G	0.209	0.4058	0	0	0
CHR16	67697150	+	C	T	ENKD1	A319T	0.233	0.373	0	0	0
CHR21	46032411	+	G	T	KRTAP10-8	V132L	0.097	0.6485	0.00274725	0.00906977	0.00295052
CHR1	182369105	+	C	T	TEDDM1	M172I	0.202	0.4165	0.00228938	0.00686047	0.00136178
CHR2	220379684	+	G	A	ASIC4	A207T	0.345	0.2574	0	0	0
CHR1	152283284	+	G	A	FLG	R1360C	0.174	0.4652	0	0.000116279	0
CHR8	30601707	+	A	G	UBXN8	M1V	0.857	0.0281	0.00228938	0.00697674	0.00113482
CHR22	25424579	+	C	A	KIAA1671	P205T	0.071	0.7386	0	0	0
CHR5	140503128	+	G	T	PCDHB4	R516S	0.426	0.2017	0	0.000116279	0
CHR9	103340606	+	A	G	MURC	M61V	0.393	0.2221	0	0	0
CHR17	7366151	+	G	T	ZBTB4	A717E	0.325	0.275	0	0	0
CHR17	27283450	+	C	T	SEZ6	A923T	0.244	0.359	0	0.000116279	0
CHR19	15122013	+	G	A	CCDC105	V126M	0.278	0.3193	0	0	0
CHR9	35162300	+	G	T	UNC13B	R7L	0.871	0.0251	0	0.000116279	0
CHR1	146656072	+	T	G	FMO5	*465S	0.995158	Readthrough	0	0	0
CHR17	1629070	+	G	A	WDR81	A273T	0.526	0.1498	0	0	0
CHR3	9959753	+	G	A	IL17RC	V92M	0.176	0.4617	0.0018315	0.00232558	0.00158874
CHR11	56257961	+	C	T	OR5M8	V296I	0.211	0.4035	0.000457875	0.00151163	0.000226963
CHR2	197706080	+	T	C	PGAP1	T883A	0.013	0.9623	0	0.000465116	0.000226963
CHR4	48343998	+	C	G	SLAIN2	S81W	0.327	0.2731	0	0	0
CHR5	42801179	+	C	T	SEPP1	M263I	0.071	0.7386	0.000457875	0.00313953	0.000226963
CHR4	139980741	+	T	C	ELF2	Q292R	0.163	0.4871	0	0.000348837	0
CHR2	42275643	+	C	G	PKDCC	P102A	0.181	0.452	0	0	0
CHR1	152325959	+	C	T	FLG2	G1435R	0.12	0.5844	0.00503663	0.00813953	0.00204267
CHR11	4406777	+	T	C	TRIM21	E389G	0.376	0.2328	0	0	0
CHR17	1326268	+	G	A	CRK	T204I	0.055	0.7986	0	0	0
CHR22	37887241	+	C	G	CARD10	E1019Q	0.703	0.0758	0	0	0
CHR6	132891752	+	T	A	TAAR6	W98R	0.929	0.011	0	0.000116279	0
CHR12	56075594	+	T	A	METTL7B	L19Q	0.735	0.0652	0.00412088	0.00302326	0
CHR1	152276699	+	A	G	FLG	W3555R	0.093	0.6622	0	0	0
CHR19	51728776	+	G	C	CD33	G114R	0.886	0.0216	0.000915751	0.000581395	0
CHR3	48663765	+	C	G	SLC26A6	E696D	0.262	0.3381	0	0.000116279	0
CHR16	30365335	+	T	A	CD2BP2	T88S	0.514	0.1555	0.00274725	0.00767442	0.00136178
CHR1	109795481	+	A	G	CELSR2	D927G	0.844	0.0318	0	0	0
CHR2	197002331	+	G	A	STK17B	S320F	0.112	0.6061	0.00320513	0.00267442	0.00317749
CHR13	84454238	+	C	T	SLITRK1	A469T	0.281	0.3163	0	0	0
CHR5	140480658	+	T	C	PCDHB3	I142T	0.661	0.0922	0.00137363	0.0027907	0.000907853
CHR9	90746744	+	T	C	SPATA31C2	K403R	0.052	0.8093	0	0	0
CHR11	129245985	+	A	G	BARX2	R19G	0.864	0.0263	0	0.000116279	0
CHR20	57766673	+	C	T	ZNF831	S200F	0.532	0.1468	0	0.00383721	0.00158874
CHR9	90746243	+	T	G	SPATA31C2	N570T	0.128	0.5645	0	0	0
CHR1	149783742	+	A	G	HIST2H2BF	L46P	0.875	0.024	0	0	0
CHR8	41790448	+	T	C	KAT6A	M1764V	0.9	0.0177	0	0	0
CHR7	141672921	+	T	C	TAS2R38	N190S	0.026	0.9116	0.000457875	0.000465116	0.000226963
CHR8	145163798	+	G	T	KIAA1875	D277Y	0.591	0.1207	0	0	0
CHR2	192701265	+	T	C	SDPR	E221G	0.405	0.2147	0.00228938	0.0055814	0.00136178
CHR10	21784863	+	G	A	C10orf114	P26L	0.278	0.3193	0	0	0
CHR19	37309643	+	C	T	ZNF790	V535I	0.05	0.8172	0	0.000116279	0
CHR6	43005430	+	C	T	CUL7	R1698Q	0.286	0.3113	0	0	0
CHR1	39340761	+	C	T	GJA9	S337N	0.053	0.8056	0	0.000581395	0
CHR16	33961917	+	C	T	LINC00273	R175Q	0.051	0.8128	0	0	0
CHR19	53303656	+	T	A	ZNF28	H481L	0.204	0.4134	0.000457875	0.005	0.000226963
CHR4	7043594	+	C	T	CCDC96	V358M	0.625	0.1059	0	0.000465116	0.000226963
CHR21	46101933	+	C	T	KRTAP12-1	V36M	0.08	0.7078	0.000457875	0.00127907	0.000453926
CHR6	56480949	+	A	C	DST	V2439G	0.072	0.7351	0	0	0
CHR18	7231467	+	A	G	LRRC30	R111G	0.122	0.5795	0.00137363	0.00453488	0.000907853
CHR19	19906175	+	T	G	ZNF506	K142T	0.032	0.889	0	0	0
CHRX	153296023	+	G	A	MECP2	P419L	0.354	0.2497	0	0.000116279	0
CHR15	22956553	+	G	A	CYFIP1	R166Q	0.734	0.0656	0	0	0
CHR17	80789907	+	C	T	ZNF750	A142T	0.08	0.7078	0.000457875	0.000697674	0
CHR9	90745364	+	T	A	SPATA31C2	K863M	0.109	0.6146	0	0	0
CHRX	73812717	+	G	T	RLIM	R145S	0.936	0.0097	0	0	0
CHR8	10467520	+	C	T	RP1L1	G1363E	0.012	0.9664	0	0	0
CHR11	62285556	+	G	T	AHNAK	P5445T	0.397	0.2197	0	0	0
CHR11	100863055	+	T	C	TMEM133	C6R	0.179	0.4564	0	0.000465116	0
CHR11	40136261	+	T	C	LRRC4C	I528V	0.635	0.1012	0.00137363	0.00104651	0.000453926
CHR22	21045184	+	G	C	POM121L4P	R289T	0.083	0.6979	0	0	0
CHR15	44166570	+	C	T	FRMD5	R409Q	0.402	0.2165	0.00137363	0.000116279	0.00340445
CHR9	111625447	+	T	C	ACTL7A	V282A	0.613	0.1112	0	0	0
CHR2	231729802	+	C	T	ITM2C	A21V	0.08	0.7078	0.00549451	0.00627907	0.00226963
CHR16	84213187	+	G	A	TAF1C	T180I	0.602	0.1159	0.000915751	0	0
CHR4	139937256	+	C	T	CCRN4L	P41S	0.178	0.4581	0	0	0
CHR13	76195986	+	A	G	LMO7	R53G	0.017	0.9463	0	0	0
CHR3	97983882	+	A	T	OR5H6	K252*	0.995158	Nonsense	0.000457875	0	0
CHR7	122635319	+	T	C	TAS2R16	R124G	0.49	0.1668	0	0	0
CHR11	49053288	+	G	T	TRIM49B	S46I	0.076	0.7208	0	0	0
CHR19	12903183	+	G	A	JUNB	A200T	0.127	0.5673	0	0	0
CHR7	72040548	+	T	C	TYW1B	S648G	0.158	0.496	0	0	0
CHR1	161019003	+	T	C	ARHGAP30	E603G	0.202	0.4165	0	0	0
CHR9	35957999	+	G	C	OR2S2	L33V	0.232	0.3744	0	0	0
CHR17	42635594	+	C	T	FZD2	P180S	0.214	0.3991	0	0	0
CHR10	43088834	+	A	C	ZNF33B	L522V	0.196	0.4266	0	0.000697674	0
CHR6	127611105	+	G	C	ECHDC1	A197G	0.58	0.1253	0	0.000116279	0
CHR22	46657895	+	G	A	PKDREJ	A442V	0.272	0.3263	0.0018315	0.000697674	0.000226963
CHR14	70990348	+	A	C	ADAM20	F426C	0.87	0.0253	0	0.000697674	0
CHR15	43038125	+	C	A	TTBK2	R1201S	0.607	0.1139	0	0	0
CHR5	159520013	+	A	C	PWWP2A	D548E	0.022	0.9272	0	0.000465116	0
CHR9	16419498	+	T	C	BNC2	D930G	0.908	0.0156	0.00228938	0.00360465	0.00136178
CHR5	112769494	+	G	A	TSSK1B	P348L	0.118	0.5898	0	0.000232558	0
CHR12	56625132	+	C	T	SLC39A5	S25L	0.196	0.4266	0	0	0
CHR11	46625450	+	G	A	HARBI1	S227F	0.585	0.1229	0.000915751	0.000116279	0
CHR13	25670988	+	T	G	PABPC3	L218V	0.263	0.3367	0	0	0
CHR6	30615579	+	G	C	C6orf136	A191P	0.121	0.5817	0	0	0
CHR9	140201494	+	G	A	EXD3	R847C	0.743	0.0631	0	0.00209302	0.000226963
CHR19	19230864	+	C	G	TMEM161A	G336R	0.024	0.9193	0	0	0
CHR1	152081406	+	G	C	TCHH	D1429E	0.161	0.4909	0	0	0
CHR1	153635184	+	T	G	ILF2	S299R	0.625	0.1059	0	0	0
CHRX	124455766	+	G	A	LOC100129520	V600I	0.003	0.9958	0	0	0
CHR11	4968050	+	A	G	OR51A4	I94T	0.72	0.07	0.00869963	0	0
CHR19	55877421	+	A	G	IL11	L106P	0.942	0.0083	0	0	0
CHR2	96852996	+	G	A	STARD7	T296M	0.79	0.0484	0.000457875	0.000232558	0.000453926
CHR1	158724811	+	G	A	OR6K6	G69E	0.922	0.0126	0.003663	0.00418605	0.000453926
CHR6	1314140	+	C	A	FOXQ1	L401I	0.315	0.2842	0	0	0
CHR13	99853739	+	G	T	UBAC2	G25V	0.03	0.8968	0	0	0
CHR10	73572088	+	T	G	CDH23	C14G	0.088	0.6797	0	0	0
CHR14	59930914	+	C	A	GPR135	W344L	0.722	0.0694	0	0	0
CHR10	63957987	+	C	G	RTKN2	A504P	0.699	0.0773	0	0.000116279	0
CHR1	152281767	+	G	T	FLG	S1865R	0.289	0.308	0	0	0
CHRX	152990762	+	C	G	ABCD1	T14R	0.214	0.3991	0	0	0
CHR16	333309	+	T	C	PDIA2	L47P	0.889	0.0203	0	0	0
CHR19	44933901	+	T	A	ZNF229	D352V	0.315	0.2842	0	0.000348837	0
CHR3	127411064	+	C	T	MGLL	A277T	0.006	0.9877	0.00320513	0.00418605	0.000226963
CHR19	37643635	+	T	C	ZNF585A	K334R	0.354	0.2497	0	0	0
CHR19	54599028	+	G	A	OSCAR	P259L	0.194	0.4301	0	0	0
CHR16	67218391	+	C	T	EXOC3L1	R716H	0.54	0.1432	0.00274725	0.00395349	0.00136178
CHR16	1129435	+	C	G	SSTR5	S189R	0.524	0.1508	0	0	0
CHR4	8583209	+	C	T	GPR78	P167L	0.081	0.7044	0	0	0
CHR13	39264221	+	T	G	FREM2	C914G	0.65	0.096	0	0.00174419	0
CHRX	102528938	+	C	G	TCEAL5	R185P	0.849	0.0302	0	0.000697674	0.000226963
CHR15	31294573	+	G	A	TRPM1	R1422C	0.245	0.3576	0.00228938	0.00569767	0.000907853
CHR19	40902893	+	G	T	PRX	P456T	0.516	0.1544	0	0	0
CHR4	140640527	+	G	A	MAML3	P1119S	0.615	0.1104	0.000915751	0.00290698	0.000226963
CHR10	105361911	+	G	A	SH3PXD2A	R994C	0.158	0.496	0.00595238	0.00430233	0.00522015
CHR6	139094822	+	C	T	CCDC28A	A4V	0.179	0.4564	0	0	0
CHR4	71570808	+	C	A	RUFY3	A52D	0.106	0.6225	0	0	0
CHR16	2009728	+	G	T	NDUFB10	V35L	0.298	0.3003	0	0.000232558	0
CHR12	56992559	+	C	G	BAZ2A	S1854T	0.392	0.2229	0	0	0.00295052
CHR12	11244036	+	T	G	TAS2R43	K265Q	0.08	0.7078	0	0	0
CHR5	1201793	+	G	A	SLC6A19	G10S	0.52	0.1525	0	0.000116279	0.000226963
CHR10	61718356	+	T	G	C10orf40	H25P	0.542	0.1423	0.000457875	0	0
CHR9	125486365	+	C	T	OR1L4	L33F	0.057	0.7911	0.00137363	0.00662791	0.00068089
CHR19	21991670	+	T	C	ZNF43	K325R	0.065	0.7605	0	0	0
CHR20	2464766	+	T	C	ZNF343	R281G	0.144	0.5264	0	0	0
CHR1	248308973	+	C	A	OR2M5	A175D	0.166	0.4807	0.00274725	0	0.00635497
CHR2	95537649	+	A	G	TEKT4	M109V	0.063	0.7674	0	0	0
CHR6	39073225	+	G	T	SAYSD1	P179T	0.713	0.0724	0.000457875	0.000116279	0
CHR19	21990937	+	G	T	ZNF43	F569L	0.182	0.4505	0	0	0
CHR11	123813720	+	C	T	OR6T1	V276I	0.037	0.8681	0.00503663	0.0094186	0.000907853
CHR5	140208941	+	A	G	PCDHA6	E422G	0.134	0.5489	0	0	0
CHR3	75787116	+	T	G	ZNF717	H553P	0.648	0.0964	0	0	0
CHR1	45288170	+	C	A	PTCH2	A1177S	0.129	0.5623	0	0	0
CHR6	152129399	+	T	C	ESR1	S118P	0.406	0.2139	0	0.00313953	0.000907853
CHR9	43627785	+	G	T	SPATA31A6	P301H	0.116	0.5949	0	0	0
CHR4	191003426	+	C	T	DUX4L4	A446V	0.012	0.9664	0	0	0
CHR15	99645622	+	G	C	SYNM	E73Q	0.174	0.4652	0	0	0
CHR7	93055724	+	C	T	CALCR	E457K	0.018	0.9422	0.000915751	0.00255814	0.00068089
CHR7	142749981	+	C	T	OR6V1	L182F	0.427	0.2012	0	0	0
CHR4	37962104	+	C	T	PTTG2	R17C	0.192	0.4332	0	0.00104651	0
CHR3	39227254	+	G	A	XIRP1	T1228I	0.03	0.8968	0	0.000465116	0
CHR17	1631372	+	G	A	WDR81	G1040E	0.257	0.3441	0	0	0
CHRX	57619311	+	A	T	ZXDB	Q277L	0.289	0.308	0	0.000116279	0.000226963
CHR11	43964986	+	C	T	C11orf96	A294V	0.028	0.9035	0	0	0
CHR19	4523602	+	G	A	PLIN5	Q444*	0.995158	Nonsense	0	0.000232558	0
CHR5	140568538	+	A	G	PCDHB9	Y549C	0.704	0.0755	0	0	0
CHR4	111398047	+	G	T	ENPEP	R159S	0.167	0.479	0.000915751	0.00325581	0.00068089
CHR6	160543080	+	G	A	SLC22A1	G38D	0.97	0.003	0.003663	0.0022093	0
CHR2	74643148	+	A	C	C2orf81	L83R	0.87	0.0253	0	0	0
CHR3	71804328	+	A	G	GPR27	*376W	0.995158	Readthrough	0	0	0
CHR2	231729852	+	C	T	ITM2C	P38S	0.039	0.8605	0	0	0
CHR21	31964889	+	G	A	KRTAP6-3	C42Y	0.118	0.5898	0.00274725	0.00255814	0.000226963
CHR3	75786132	+	T	C	ZNF717	Q881R	0.498	0.1637	0	0	0
CHR5	149240492	+	C	A	PDE6A	G850V	0.429	0.2002	0.000915751	0.00186047	0
CHR12	66583210	+	T	C	IRAK3	L44P	0.859	0.0276	0	0	0
CHR5	139508064	+	G	A	IGIP	M1I	0.614	0.1108	0.000915751	0.00186047	0.000907853
CHR19	22939786	+	T	C	ZNF99	K849E	0.148	0.5176	0	0	0
CHR17	1538083	+	A	G	SCARF1	V821A	0.16	0.4927	0.00595238	0.000581395	0.000453926
CHR9	84547720	+	G	C	SPATA31D4	G882R	0.138	0.5394	0	0	0
CHR1	152191319	+	G	A	HRNR	S929F	0.218	0.3929	0	0	0
CHR8	59404248	+	T	A	CYP7A1	Y434F	0.598	0.1178	0	0	0
CHR2	33172748	+	C	A	LTBP1	H119Q	0.087	0.6831	0	0	0
CHR19	3179748	+	A	T	S1PR4	S320C	0.154	0.5041	0	0	0
CHRX	136112910	+	C	G	GPR101	E308D	0.111	0.6087	0	0	0
CHR5	115298898	+	C	T	AQPEP	P195L	0.087	0.6831	0.00320513	0.00453488	0.00068089
CHR7	16566587	+	G	A	LRRC72	D4N	0.02	0.9347	0	0	0
CHR17	20483862	+	T	G	CDRT15L2	I222M	0.157	0.4983	0	0	0
CHR2	178481747	+	C	G	TTC30A	E561D	0.126	0.5694	0.000457875	0	0.000226963
CHR15	40573830	+	G	A	ANKRD63	P320S	0.269	0.3297	0	0	0
CHR11	5475371	+	A	G	OR51I2	Y218C	0.912	0.0149	0	0.000116279	0
CHR11	4511034	+	C	T	OR52K1	R302C	0.36	0.2453	0.000457875	0.000930233	0.00068089
CHR22	20457131	+	A	G	RIMBP3	W1391R	0.307	0.2917	0	0	0
CHR1	152191472	+	G	A	HRNR	S878L	0.089	0.6759	0.0018315	0.00127907	0.000453926
CHR5	156456715	+	C	T	HAVCR1	A364T	0.006	0.9877	0.00274725	0.00453488	0
CHR17	80010207	+	T	C	GPS1	S9P	0.209	0.4058	0	0	0.000226963
CHR11	63320521	+	G	A	HRASLS2	T135M	0.127	0.5673	0	0	0
CHR2	74362748	+	C	T	BOLA3	R99Q	0.564	0.1326	0	0	0
CHR19	22156863	+	C	A	ZNF208	V325F	0.021	0.9306	0	0	0
CHR14	105409031	+	T	C	AHNAK2	M4253V	0.056	0.7946	0	0	0
CHR13	39265512	+	G	A	FREM2	R1344H	0.814	0.0414	0.00137363	0.00267442	0.000453926
CHR10	126678163	+	G	A	CTBP2	A421V	0.653	0.0946	0	0	0
CHR22	25424117	+	A	G	KIAA1671	K51E	0.429	0.2002	0	0	0
CHR17	28706683	+	C	G	CPD	P229A	0.237	0.3679	0	0	0
CHR19	22363650	+	G	A	ZNF676	S290F	0.178	0.4581	0	0	0
CHR3	135969270	+	C	T	PCCB	A18V	0.064	0.7643	0	0	0
CHR14	91700405	+	T	A	GPR68	K330N	0.128	0.5645	0.000915751	0.000465116	0
CHR8	10623282	+	G	A	PINX1	Q206*	0.995158	Nonsense	0	0	0
CHR16	67063387	+	A	G	CBFB	E26G	0.795	0.047	0	0	0
CHR1	147230773	+	G	A	GJA5	H192Y	0.533	0.1465	0	0	0
CHR22	31091347	+	C	T	OSBP2	P151S	0.057	0.7911	0.000915751	0.000116279	0
CHR19	40901452	+	A	G	PRX	F936S	0.713	0.0724	0	0	0
CHR14	78174483	+	C	T	SLIRP	A10V	0.123	0.5771	0.00595238	0.00755814	0.00113482
CHR1	78245342	+	T	G	FAM73A	M1R	0.218	0.3929	0	0.000697674	0
CHR3	172224682	+	C	A	TNFSF10	A100S	0.009	0.9767	0	0	0
CHR4	8951747	+	G	A	LOC650293	V91I	0.022	0.9272	0.00412088	0	0
CHR5	140475840	+	C	T	PCDHB2	T489I	0.407	0.2134	0	0	0
CHR1	152189657	+	C	T	HRNR	R1483Q	0.076	0.7208	0	0	0
CHR19	44932614	+	G	A	ZNF229	S781F	0.539	0.1436	0.000457875	0.000813953	0
CHR1	160914976	+	C	T	ITLN2	C311Y	0.134	0.5489	0	0	0
CHR11	76371468	+	G	A	LRRC32	T390M	0.167	0.479	0	0	0
CHR17	10424643	+	C	T	MYH2	R1927Q	0.908	0.0156	0.00641026	0.00744186	0.00136178
CHR1	172410988	+	T	G	PIGC	M259L	0.085	0.6913	0	0	0
CHR12	57624725	+	A	G	SHMT2	E37G	0.215	0.3973	0	0	0
CHR1	183908026	+	C	T	COLGALT2	A584T	0.057	0.7911	0	0.000697674	0
CHR1	154932053	+	C	T	PYGO2	M141I	0.542	0.1423	0.000915751	0.000348837	0.0043123
CHR18	77623938	+	C	T	KCNG2	R91*	0.995158	Nonsense	0	0	0
CHR18	5891794	+	G	C	TMEM200C	P90R	0.263	0.3367	0	0.000116279	0
CHR19	53770387	+	T	C	VN1R4	T178A	0.1	0.6398	0	0	0
CHR22	37770812	+	C	T	ELFN2	V255M	0.139	0.5371	0	0.00127907	0.000226963
CHR2	228846564	+	C	G	SPHKAP	V1629L	0.726	0.0677	0.00732601	0.00930233	0.00181571
CHR11	46740795	+	G	A	F2	V4I	0.086	0.6875	0	0	0
CHR3	49721805	+	C	T	MST1	R653H	0.41	0.2117	0	0	0
CHR9	90745326	+	T	C	SPATA31C2	T876A	0.016	0.9502	0	0	0
CHR22	31091305	+	C	T	OSBP2	L137F	0.033	0.8846	0.00412088	0.00976744	0.00068089
CHR17	39191027	+	G	A	KRTAP1-3	T16I	0.082	0.7012	0.00320513	0.00383721	0.000453926
CHR3	184064800	+	T	C	CLCN2	I765V	0.034	0.8803	0	0.000348837	0.000226963
CHR7	8009280	+	C	T	GLCCI1	A100V	0.114	0.6002	0	0	0
CHR8	144808779	+	G	A	FAM83H	A951V	0.051	0.8128	0	0.000232558	0
CHR10	30602650	+	C	T	MTPAP	S546N	0.01	0.9729	0.0018315	0.00232558	0
CHR6	28359106	+	T	G	ZSCAN12	K321Q	0.432	0.1984	0	0	0
CHR9	140086584	+	C	T	TPRN	E706K	0.786	0.0495	0	0.000116279	0
CHR11	1605983	+	G	C	KRTAP5-1	A166G	0.106	0.6225	0	0	0
CHR17	18566479	+	C	T	ZNF286B	V114M	0.04	0.8573	0	0	0
CHR17	5389739	+	G	A	MIS12	E1-	0.995158	Splice site	0	0	0
CHR5	175110408	+	G	A	HRH2	V58M	0.471	0.177	0	0.000232558	0
CHR2	128522492	+	G	C	WDR33	A179G	0.772	0.0539	0	0	0
CHR19	58385664	+	A	G	ZNF814	V365A	0.052	0.8093	0	0	0
CHR13	50235186	+	G	A	EBPL	P180L	0.949	0.0068	0.0018315	0.00127907	0.000226963
CHR11	62295398	+	T	A	AHNAK	D2164V	0.266	0.3335	0	0.00104651	0
CHR6	79577445	+	G	A	IRAK1BP1	R51H	0.644	0.0979	0	0.000116279	0
CHRX	64708833	+	T	C	ZC3H12B	L51P	0.573	0.1282	0	0.000581395	0
CHR6	26108117	+	C	T	HIST1H1T	A69T	0.535	0.1454	0.000457875	0	0.00272356
CHR20	61512053	+	C	A	DIDO1	G1752V	0.526	0.1498	0	0	0
CHR14	78184485	+	A	G	SNW1	I546T	0.034	0.8803	0	0.000930233	0.000226963
CHR16	89262483	+	C	T	SLC22A31	R314H	0.066	0.7568	0	0	0
CHR3	17202649	+	A	T	TBC1D5	S732T	0.046	0.8336	0.000915751	0.0022093	0.000226963
CHR7	127669499	+	G	A	LRRC4	P399S	0.424	0.2029	0.00137363	0.00267442	0.00068089
CHR16	2510363	+	C	G	C16orf59	R36G	0.426	0.2017	0	0	0
CHR19	53668068	+	T	C	ZNF665	I559V	0.039	0.8605	0.00457875	0.00802326	0.00158874
CHR11	5475598	+	G	A	OR51I2	A294T	0.214	0.3991	0.00457875	0.0077907	0.00181571
CHR15	43621136	+	T	C	LCMT2	T518A	0.156	0.5002	0.00457875	0.00453488	0.000907853
CHR11	114392694	+	C	A	NXPE1	C405F	0.936	0.0097	0	0	0
CHR11	59283139	+	G	A	OR4D9	V252M	0.419	0.2059	0	0.000116279	0
CHR12	100042482	+	T	C	FAM71C	V177A	0.296	0.3022	0.00228938	0.000697674	0.00272356
CHR12	2936425	+	G	A	NRIP2	A265V	0.195	0.4284	0.00228938	0.00337209	0.000226963
CHR5	77298797	+	T	C	AP3B1	I1023V	0.181	0.452	0	0	0
CHR2	179613049	+	A	G	TTN	I4693T	0.009	0.9767	0.000457875	0.00127907	0.000226963
CHR8	145752973	+	G	T	C8orf82	A135D	0.526	0.1498	0	0	0
CHR7	73008233	+	G	A	MLXIPL	R820W	0.167	0.479	0.00274725	0.0094186	0.00158874
CHR6	89322504	+	A	C	RNGTT	H576Q	0.139	0.5371	0.00137363	0.000697674	0.000226963
CHR6	29760256	+	C	A	LOC554223	P114H	0.05	0.8172	0.00732601	0	0
CHR19	19640309	+	C	A	YJEFN3	P66T	0.078	0.7145	0.00549451	0	0.00068089
CHR19	59056411	+	C	T	TRIM28	A96V	0.113	0.6033	0	0	0
CHR1	152082310	+	C	G	TCHH	R1128P	0.369	0.238	0	0	0
CHR19	38160644	+	C	T	ZNF781	G136R	0.071	0.7386	0.000457875	0.000116279	0.000453926
CHR1	150255718	+	C	T	C1orf51	S14F	0.289	0.308	0	0.000581395	0.000226963
CHR12	42481617	+	G	C	GXYLT1	R401G	0.08	0.7078	0	0	0
CHR9	5919929	+	T	C	KIAA2026	I2023V	0.078	0.7145	0	0.000697674	0
CHR12	11214091	+	G	C	TAS2R46	A268G	0.118	0.5898	0	0	0
CHR12	123641452	+	C	A	MPHOSPH9	A1000S	0.543	0.1417	0	0	0
CHR22	21901827	+	C	G	RIMBP3C	V1147L	0.04	0.8573	0	0	0
CHR5	72743448	+	C	G	FOXD1	G247A	0.148	0.5176	0	0	0
CHR8	101146550	+	G	A	FBXO43	L573F	0.414	0.2092	0	0	0
CHR13	107823070	+	T	A	FAM155A	K384N	0.066	0.7568	0.00549451	0.00639535	0.00136178
CHR11	48238455	+	G	A	OR4B1	V32M	0.108	0.6173	0	0.00325581	0.000453926
CHR12	65564329	+	T	C	LEMD3	M318T	0.332	0.2683	0	0	0
CHR4	121958491	+	C	T	NDNF	C212Y	0.964	0.0042	0	0	0.000226963
CHR21	45750089	+	C	T	C21orf2	A213T	0.039	0.8605	0	0.00162791	0.000907853
CHR3	97887995	+	C	G	OR5H15	A151G	0.082	0.7012	0	0	0
CHRX	106144023	+	C	T	RIPPLY1	E91K	0.131	0.5573	0	0.000116279	0
CHR19	22363413	+	C	T	ZNF676	G369E	0.136	0.5441	0	0	0
CHR4	114823986	+	C	T	ARSJ	R415Q	0.917	0.0136	0.000915751	0.00197674	0.000226963
CHR12	862856	+	C	A	WNK1	A42E	0.12	0.5844	0	0	0
CHR9	125273271	+	G	T	OR1J2	S64I	0.535	0.1454	0	0.00430233	0.000453926
CHR11	5153812	+	C	T	OR52A5	G21S	0.681	0.0836	0.000457875	0	0
CHR4	1389300	+	A	C	CRIPAK	H334P	0.284	0.3137	0	0	0
CHR13	84454420	+	T	A	SLITRK1	N408I	0.599	0.1173	0	0	0
CHR19	23836350	+	A	T	ZNF675	I462N	0.064	0.7643	0	0	0
CHR17	59533955	+	C	T	TBX4	A35V	0.086	0.6875	0.00915751	0	0
CHR1	63788776	+	C	T	FOXD3	T16M	0.588	0.1218	0	0.000813953	0.000226963
CHR5	10227711	+	G	A	FAM173B	R165*	0.995158	Nonsense	0.000457875	0.00488372	0.000907853
CHR19	54695684	+	G	A	TSEN34	G119D	0.462	0.1822	0	0	0
CHR9	130494478	+	G	A	TOR2A	R63C	0.311	0.288	0	0.000232558	0.000226963
CHR17	39203051	+	A	T	KRTAP2-1	S123T	0.118	0.5898	0	0	0
CHR4	26862779	+	A	T	STIM2	H67L	0.39	0.2242	0	0	0
CHR18	19996534	+	G	A	CTAGE1	T414I	0.211	0.4035	0.00503663	0.000116279	0.00068089
CHR6	46657722	+	T	G	TDRD6	F619L	0.275	0.3224	0.00137363	0.0027907	0.00068089
CHR6	99283172	+	A	T	POU3F2	Q141H	0.315	0.2842	0	0	0
CHR17	51900653	+	G	C	KIF2B	E87Q	0.077	0.7176	0	0	0
CHR1	32193021	+	T	C	BAI2	*1586W	0.995158	Readthrough	0	0	0
CHR16	86545002	+	C	T	FOXF1	A276V	0.422	0.2038	0	0	0
CHR5	159821636	+	T	C	C5orf54	R288G	0.51	0.1572	0	0.000232558	0
CHR6	27805885	+	C	G	HIST1H2AK	R78P	0.937	0.0094	0	0	0
CHR2	107429612	+	A	G	ST6GAL2	W463R	0.095	0.6554	0	0.00232558	0
CHR3	119217756	+	G	A	TIMMDC1	R59Q	0.143	0.5286	0.000457875	0.000930233	0
CHR19	1506135	+	C	T	ADAMTSL5	R432H	0.69	0.0801	0.000915751	0.005	0.00068089
CHR5	171765462	+	T	C	SH3PXD2B	S883G	0.455	0.1856	0	0.000465116	0
CHR15	50534966	+	T	C	HDC	I494V	0.03	0.8968	0.003663	0.00709302	0.00204267
CHR3	140660927	+	T	C	SLC25A36	F11L	0.579	0.1258	0	0	0.000226963
CHR3	75786261	+	C	T	ZNF717	G838E	0.267	0.3322	0	0	0
CHR12	10066205	+	T	A	CLEC2A	D162V	0.673	0.0865	0.00457875	0.00325581	0.000453926
CHR13	103392741	+	G	A	CCDC168	R3436W	0.079	0.7114	0.00137363	0	0
CHR11	124310318	+	G	A	OR8B8	L222F	0.182	0.4505	0.00412088	0.000465116	0.00317749
CHRX	24382417	+	G	C	SUPT20HL1	A514P	0.119	0.587	0.00542495	0	0
CHR6	29556379	+	A	G	OR2H2	T220A	0.024	0.9193	0.00503663	0.00406977	0.00068089
CHR4	74702526	+	C	G	CXCL6	A20G	0.219	0.3916	0	0	0
CHR6	43400500	+	G	A	ABCC10	R218H	0.248	0.3545	0.00137363	0.00534884	0.00158874
CHR19	22940732	+	C	T	ZNF99	W660*	0.995158	Nonsense	0.00549451	0.000465116	0
CHR11	108382793	+	C	A	EXPH5	M1147I	0.044	0.8418	0.003663	0.00546512	0.00158874
CHR15	72691085	+	C	T	TMEM202	T58M	0.135	0.5464	0.00137363	0.000930233	0.000226963
CHR19	19256794	+	G	T	MEF2B	R307S	0.018	0.9422	0.003663	0	0
CHR16	27460303	+	G	C	IL21R	G439A	0.091	0.6693	0	0	0
CHR3	75788316	+	C	T	ZNF717	G153E	0.455	0.1856	0	0	0
CHR17	39211139	+	C	A	KRTAP2-2	G109C	0.212	0.402	0	0	0
CHR15	75942457	+	C	G	SNX33	D338E	0.047	0.8299	0	0	0
CHR16	1841559	+	G	A	IGFALS	P287L	0.175	0.4638	0.00549451	0.00581395	0.000907853
CHR19	35250451	+	C	T	ZNF599	G419R	0.429	0.2002	0	0.000232558	0
CHR17	38519227	+	C	T	GJD3	G281S	0.06	0.7789	0	0	0
CHR17	80789387	+	A	G	ZNF750	L315P	0.403	0.2158	0	0.000348837	0
CHR8	42608449	+	T	C	CHRNA6	E438G	0.152	0.5086	0	0	0
CHR6	116600845	+	C	G	TSPYL1	G50A	0.416	0.2078	0	0	0
CHR11	3687476	+	G	T	CHRNA10	T405N	0.079	0.7114	0.000915751	0.00244186	0.000453926
CHR20	741709	+	G	C	SLC52A3	F457L	0.976	0.0021	0	0.000697674	0.000226963
CHR19	52469312	+	G	A	ZNF350	R132C	0.082	0.7012	0.000457875	0.00639535	0.00158874
CHR1	47882003	+	G	A	FOXE3	D6N	0.03	0.8968	0	0	0
CHR15	102346417	+	C	A	OR4F6	D165E	0.254	0.348	0	0.000232558	0
CHR9	99795260	+	C	T	CTSL2	A326T	0.773	0.0536	0	0	0
CHR6	99284008	+	C	T	POU3F2	P420L	0.594	0.1197	0	0	0
CHR10	15256169	+	T	C	FAM171A1	E473G	0.783	0.0503	0.000915751	0.00127907	0.000453926
CHR4	15004828	+	G	C	CPEB2	Q177H	0.061	0.7753	0	0	0
CHR3	122399858	+	A	G	PARP14	E43G	0.312	0.2871	0	0	0
CHR3	75787159	+	C	T	ZNF717	E539K	0.335	0.2653	0	0	0
CHR7	1037307	+	G	A	C7orf50	P180L	0.13	0.5596	0.000457875	0	0
CHR7	5633175	+	T	C	FSCN1	V203A	0.306	0.2926	0	0	0
CHR20	20033195	+	C	G	CRNKL1	A49P	0.035	0.8761	0.000457875	0.00104651	0.000226963
CHR19	51329146	+	C	T	KLK15	G225D	0.878	0.0234	0.00228938	0.00616279	0.00113482
CHR5	42800967	+	C	T	SEPP1	R334Q	0.005	0.9906	0	0.00104651	0.00068089
CHR20	34541920	+	C	T	SCAND1	G96D	0.182	0.4505	0	0.000581395	0.000226963
CHR5	140626117	+	G	C	PCDHB15	G324A	0.578	0.1261	0.00274725	0.00383721	0.00068089
CHR11	18253137	+	G	A	SAA4	S102L	0.054	0.8022	0.00503663	0.000232558	0
CHR17	44594547	+	G	A	ARL17A	P193L	0.273	0.3252	0	0	0
CHR8	144990508	+	C	T	PLEC	R4462H	0.549	0.1386	0	0	0
CHR20	57036364	+	C	A	APCDD1L	V330L	0.194	0.4301	0	0.000581395	0.00068089
CHR4	38799560	+	G	A	TLR1	S298F	0.795	0.047	0.00137363	0.000930233	0
CHR8	127569057	+	T	G	FAM84B	E193A	0.308	0.2908	0	0	0
CHR4	15004676	+	A	C	CPEB2	T127P	0.059	0.7827	0	0	0
CHR3	5229810	+	G	A	EDEM1	R107Q	0.154	0.5041	0	0.000116279	0
CHR4	5823570	+	T	G	CRMP1	I546L	0.3	0.2984	0	0.00151163	0.000453926
CHR13	103394669	+	G	A	CCDC168	A2793V	0.055	0.7986	0	0	0
CHR5	44809162	+	G	T	MRPS30	C33F	0.079	0.7114	0	0	0
CHR18	13826552	+	C	A	MC5R	S263Y	0.674	0.0861	0	0	0
CHR12	123187751	+	A	G	HCAR2	V27A	0.063	0.7674	0	0	0
CHR2	88747877	+	C	T	FOXI3	S370N	0.033	0.8846	0	0	0
CHR5	140783490	+	G	T	PCDHGA9	G324V	0.508	0.1579	0	0.000930233	0
CHR1	226074594	+	C	T	LEFTY1	G312R	0.649	0.0962	0	0.00174419	0.000453926
CHR19	9801726	+	A	C	ZNF812	D151E	0.036	0.8723	0.00228938	0	0
CHR11	14666252	+	G	T	PDE3B	A211S	0.196	0.4266	0	0	0
CHR11	55761734	+	T	A	OR5F1	Y123F	0.462	0.1822	0.00274725	0.00639535	0.000907853
CHR1	152276770	+	G	C	FLG	T3531R	0.326	0.274	0	0	0
CHR9	132400660	+	C	T	ASB6	W189*	0.995158	Nonsense	0.00274725	0.00697674	0.00136178
CHR11	1651567	+	C	T	KRTAP5-5	S166F	0.223	0.3863	0	0	0
CHR8	6669437	+	G	T	XKR5	A448D	0.112	0.6061	0	0	0
CHR4	780471	+	T	C	CPLX1	K75E	0.576	0.1268	0	0.000116279	0.000226963
CHR5	140773042	+	C	G	PCDHGA8	P221R	0.094	0.6589	0.000457875	0.00104651	0.000453926
CHR15	35044917	+	T	C	GJD2	Y243C	0.848	0.0304	0	0	0
CHR14	74004547	+	C	T	ACOT1	A141V	0.06	0.7789	0	0.00267442	0.00408534
CHR7	97846742	+	G	A	TECPR1	P1153L	0.057	0.7911	0	0.000465116	0
CHR5	140216004	+	C	G	PCDHA7	S679W	0.458	0.1844	0	0.000232558	0
CHR17	5085768	+	G	A	ZNF594	P595L	0.098	0.6453	0	0	0
CHR1	155260448	+	C	T	PKLR	R516H	0.104	0.6278	0	0.000232558	0
CHR6	28963358	+	T	C	ZNF311	E474G	0.181	0.452	0	0	0
CHRX	101408928	+	G	A	BEX5	H104Y	0.717	0.0712	0	0	0
CHR14	105417077	+	C	T	AHNAK2	G1571S	0.131	0.5573	0.000915751	0.000116279	0.00363141
CHR8	144995618	+	C	T	PLEC	A2759T	0.507	0.1584	0	0	0
CHR11	5373652	+	C	G	OR51B6	F305L	0.194	0.4301	0.003663	0.00639535	0.000907853
CHR17	39471871	+	C	G	KRTAP17-1	C11S	0.412	0.2104	0	0	0
CHR5	114916373	+	G	A	TICAM2	A194V	0.617	0.1094	0	0.000697674	0
CHR4	70146423	+	G	A	UGT2B28	A69T	0.058	0.7867	0.00228938	0.00534884	0.00158874
CHR6	114379311	+	G	A	HS3ST5	R51C	0.56	0.1344	0	0	0.000226963
CHR17	60705272	+	G	C	MRC2	A37P	0.435	0.1968	0	0	0
CHR7	108205049	+	A	C	THAP5	N216K	0.036	0.8723	0	0	0
CHR16	726301	+	G	A	RHBDL1	R67H	0.057	0.7911	0	0.00383721	0.00068089
CHR17	649566	+	C	T	GEMIN4	G573S	0.588	0.1218	0	0	0
CHR1	157485510	+	C	T	FCRL5	R960Q	0.025	0.9157	0	0	0
CHR2	25384597	+	C	T	POMC	D53N	0.161	0.4909	0	0	0
CHR21	31538358	+	T	C	CLDN17	Q193R	0.027	0.9076	0.00228938	0.00581395	0.000453926
CHR2	242793344	+	G	T	PDCD1	Q245K	0.134	0.5489	0	0	0
CHR2	74641622	+	A	G	C2orf81	V534A	0.142	0.5303	0.00549451	0.00465116	0.00158874
CHR5	140768146	+	T	A	PCDHGB4	V232E	0.974	0.0023	0	0	0
CHR14	70991537	+	C	G	ADAM20	A30P	0.117	0.5926	0	0	0
CHR2	202626242	+	C	T	ALS2	E159K	0.496	0.1646	0.00457875	0.000581395	0.000907853
CHR1	161141673	+	C	T	B4GALT3	R372H	0.426	0.2017	0.000915751	0.00197674	0.000907853
CHR21	39755555	+	G	C	ERG	P288A	0.039	0.8605	0	0	0
CHR19	12155456	+	G	A	ZNF878	R254C	0.272	0.3263	0.000915751	0.000116279	0.00317749
CHR8	145153851	+	C	T	SHARPIN	R365H	0.755	0.0592	0.00228938	0.00511628	0.000907853
CHR15	41060221	+	T	C	DNAJC17	M278V	0.674	0.0861	0.000915751	0.00290698	0.00136178
CHR5	156514148	+	A	G	HAVCR2	S291P	0.234	0.3717	0	0	0
CHR5	85913891	+	C	T	COX7C	R7W	0.946	0.0075	0	0	0
CHR5	140736833	+	T	C	PCDHGA4	L689P	0.835	0.0347	0	0	0
CHR8	139601612	+	G	T	COL22A1	P1589T	0.265	0.3348	0.00457875	0.00569767	0.00181571
CHR4	675710	+	T	C	MYL5	I150T	0.295	0.3028	0.00412088	0.00837209	0.00113482
CHR8	140743452	+	G	A	TRAPPC9	S1100L	0.503	0.161	0.000457875	0	0
CHR1	152284210	+	C	T	FLG	R1051H	0.042	0.8494	0	0	0
CHR2	27436061	+	C	A	ATRAID	P39Q	0.624	0.1062	0	0.000116279	0
CHR8	10467652	+	G	C	RP1L1	A1319G	0.007	0.9848	0	0	0
CHR1	152281158	+	A	T	FLG	H2068Q	0.142	0.5303	0	0.000465116	0
CHR14	75989077	+	C	G	BATF	P18A	0.401	0.2173	0.000915751	0.00465116	0.000453926
CHR6	85447125	+	T	G	TBX18	N368H	0.148	0.5176	0.00137363	0.000581395	0.0024966
CHR7	99758158	+	G	T	GAL3ST4	P184T	0.037	0.8681	0.000457875	0.000348837	0
CHR7	43917474	+	G	A	URGCP	R487W	0.293	0.3044	0	0	0
CHR7	113519232	+	C	A	PPP1R3A	G639C	0.153	0.5065	0.0018315	0.00732558	0.000907853
CHR19	1556004	+	C	G	MEX3D	S505T	0.146	0.5218	0	0	0
CHR2	27799936	+	G	T	C2orf16	G166V	0.16	0.4927	0.00137363	0.00209302	0.00068089
CHR17	38633854	+	C	T	TNS4	A712T	0.06	0.7789	0.000915751	0.00593023	0.00181571
CHR22	21044631	+	G	A	POM121L4P	D105N	0.024	0.9193	0	0	0
CHR5	70883368	+	C	T	MCCC2	S39F	0.908	0.0156	0	0	0
CHR1	22446883	+	T	C	WNT4	D239G	0.89	0.0201	0	0	0
CHR11	51515484	+	A	C	OR4C46	D68A	0.828	0.0373	0	0	0
CHR1	153085095	+	A	G	SPRR2F	S39P	0.079	0.7114	0	0	0
CHR3	75787926	+	T	C	ZNF717	Y283C	0.433	0.198	0	0	0
CHR19	46915114	+	A	C	CCDC8	N318K	0.021	0.9306	0.00320513	0.00860465	0.00158874
CHR6	137323374	+	C	T	IL20RA	S328N	0.011	0.9697	0	0	0
CHR12	10568395	+	T	C	KLRC3	S2-	0.995158	Splice site	0.000915751	0.000232558	0
CHR17	48069009	+	C	G	DLX3	D246H	0.82	0.0397	0.00137363	0	0
CHR17	70117719	+	G	C	SOX9	E63Q	0.243	0.3604	0	0.000116279	0
CHR6	46659422	+	A	G	TDRD6	N1186S	0.008	0.9807	0.000915751	0.000697674	0.000226963
CHR9	35957285	+	C	G	OR2S2	A271P	0.256	0.3454	0	0	0
CHR5	140236789	+	T	C	PCDHA10	C386R	0.902	0.0172	0	0.000116279	0
CHR7	90895525	+	T	C	FZD1	S444P	0.982	0.0009	0	0	0
CHR20	61341172	+	T	C	NTSR1	F205L	0.338	0.2625	0.000457875	0.00302326	0.000453926
CHR9	90746922	+	A	G	SPATA31C2	W344R	0.052	0.8093	0	0	0
CHR1	114438448	+	T	C	AP4B1	I476V	0.09	0.6726	0.00320513	0.00534884	0.000907853
CHR3	12046207	+	C	G	SYN2	T61R	0.177	0.4597	0	0	0
CHR9	123715037	+	T	C	C5	I1671V	0.112	0.6061	0	0.000116279	0.000226963
CHR20	25656224	+	G	A	ZNF337	S567L	0.15	0.5129	0.00137363	0.00116279	0.000453926
CHR3	98216586	+	C	G	OR5K2	P21R	0.556	0.1357	0.00732601	0.00697674	0.00340445
CHR17	14204840	+	G	A	HS3ST3B1	G2E	0.45	0.1885	0	0.000232558	0.000226963
CHR9	134165410	+	G	A	PPAPDC3	R9H	0.592	0.1204	0.00137363	0.00325581	0.000907853
CHR7	141629932	+	C	A	CLEC5A	R180L	0.829	0.0368	0.000457875	0.000348837	0
CHRX	151935240	+	C	A	MAGEA3	L309F	0.076	0.7208	0	0	0
CHR11	65486112	+	T	C	KAT5	L354P	0.987	0.0005	0	0	0
CHR4	190990257	+	C	T	DUX2	L451F	0.021	0.9306	0	0	0
CHR17	44591751	+	A	T	LRRC37A2	K558M	0.139	0.5371	0	0	0
CHR11	124791098	+	C	T	HEPACAM	R396Q	0.455	0.1856	0	0	0
CHR9	115759596	+	T	G	ZNF883	H315P	0.466	0.1796	0	0	0
CHR11	62295315	+	T	G	AHNAK	N2192H	0.027	0.9076	0	0	0
CHR1	248737448	+	G	A	OR2T34	T204M	0.071	0.7386	0	0	0
CHR14	105417454	+	A	G	AHNAK2	V1445A	0.036	0.8723	0	0.00302326	0.0024966
CHR19	56127560	+	A	G	ZNF865	E859G	0.676	0.0853	0	0	0
CHR10	15256556	+	A	T	FAM171A1	L344H	0.874	0.0242	0	0	0
CHR16	19514865	+	C	G	GDE1	S308T	0.058	0.7867	0	0	0
CHR5	93856145	+	T	C	KIAA0825	N260D	0.084	0.6946	0.000457875	0.000581395	0
CHR9	79634968	+	G	C	FOXB2	G133A	0.086	0.6875	0	0	0
CHR12	56078988	+	G	A	ITGA7	Q997*	0.995158	Nonsense	0	0.000116279	0
CHR8	30890267	+	C	T	PURG	G11D	0.355	0.2491	0	0	0
CHRX	6451929	+	C	T	VCX3A	V140M	0.118	0.5898	0	0	0
CHR8	57354366	+	G	A	PENK	P90L	0.067	0.7529	0.000457875	0.000465116	0
CHR11	7960298	+	A	T	OR10A3	M257K	0.785	0.0499	0	0.00116279	0.000226963
CHR5	179290933	+	C	T	TBC1D9B	E1073K	0.05	0.8172	0.000457875	0.000697674	0.000453926
CHR5	110428085	+	C	G	WDR36	D33E	0.651	0.0954	0.003663	0.00744186	0.000453926
CHR19	12243995	+	C	G	ZNF20	E333Q	0.143	0.5286	0.00549451	0.00790698	0.00113482
CHR1	152324195	+	T	C	FLG2	T2023A	0.068	0.7491	0	0	0
CHR19	22156850	+	A	G	ZNF208	I329T	0.028	0.9035	0	0	0
CHR10	75406804	+	G	A	SYNPO2L	P645L	0.059	0.7827	0	0.000116279	0.000226963
CHR16	1272027	+	C	T	TPSG1	G243S	0.509	0.1576	0	0	0
CHRX	49028363	+	C	T	PLP2	R6C	0.298	0.3003	0.00241109	0.00988372	0.00272356
CHR1	248186034	+	G	T	OR2L5	R262I	0.425	0.2024	0	0	0
CHR8	10466464	+	G	A	RP1L1	T1715M	0.029	0.9003	0	0.000232558	0.000226963
CHR11	48366958	+	T	G	OR4C45	R287S	0.024	0.9193	0	0	0
CHR12	108985417	+	T	C	TMEM119	E248G	0.157	0.4983	0	0	0
CHR17	78184438	+	C	T	SGSH	R441Q	0.122	0.5795	0.000457875	0.000813953	0.000453926
CHR8	74333676	+	T	A	STAU2	K376N	0.211	0.4035	0.00274725	0.00174419	0.000453926
CHR9	33240216	+	C	T	SPINK4	R4C	0.465	0.1803	0.000457875	0.00255814	0.000226963
CHR9	112004040	+	C	T	EPB41L4B	D487N	0.028	0.9035	0.000457875	0.000581395	0.000226963
CHR8	144940649	+	G	A	EPPK1	T2258M	0.699	0.0773	0	0	0
CHR3	75788040	+	G	A	ZNF717	A245V	0.499	0.1632	0	0	0
CHR19	14165873	+	C	A	PALM3	S189I	0.221	0.3888	0.00412088	0.00523256	0.000907853
CHR9	91605981	+	C	T	C9orf47	S24L	0.072	0.7351	0.000915751	0.00395349	0.00068089
CHR15	24924316	+	G	A	NPAP1	G1101D	0.367	0.2397	0.0018315	0.00244186	0.000226963
CHRX	151123421	+	C	T	GABRE	A425T	0.046	0.8336	0	0.000348837	0
CHR7	73098119	+	G	A	WBSCR22	G15R	0.014	0.9588	0	0.000232558	0
CHR17	18647864	+	A	G	FBXW10	K103E	0.012	0.9664	0	0	0
CHR4	126238090	+	G	T	FAT4	R175L	0.83	0.0364	0.00274725	0.00465116	0.00113482
CHR19	21990602	+	G	A	ZNF43	S681F	0.114	0.6002	0	0.00209302	0.000453926
CHRX	21674730	+	C	A	KLHL34	A393S	0.154	0.5041	0	0	0
CHR2	74425773	+	C	A	MTHFD2	A2D	0.417	0.2074	0	0	0
CHR9	84562812	+	C	G	SPATA31D3	R882G	0.075	0.7247	0	0	0
CHR16	33961672	+	T	G	LINC00273	S257R	0.034	0.8803	0	0	0
CHR4	187454894	+	T	A	MTNR1A	K334N	0.186	0.4431	0.00274725	0.00267442	0.00068089
CHR6	157100406	+	C	A	ARID1B	P448Q	0.214	0.3991	0	0	0
CHR19	53384826	+	C	T	ZNF320	G185R	0.268	0.3308	0.00228938	0.00534884	0.00204267
CHR15	74032746	+	G	A	C15orf59	R132W	0.382	0.2287	0	0.000232558	0.000226963
CHRX	153051663	+	T	C	IDH3G	R362G	0.533	0.1465	0	0	0
CHR9	107380040	+	C	G	OR13C9	W149S	0.599	0.1173	0	0.000116279	0
CHR7	142919892	+	G	T	TAS2R40	A241S	0.645	0.0976	0	0	0
CHR16	33962062	+	G	T	LINC00273	R127S	0.017	0.9463	0	0	0
CHR3	47894356	+	G	A	MAP4	R1112C	0.133	0.5515	0	0.000116279	0
CHR19	15272105	+	C	T	NOTCH3	G2112S	0.241	0.3627	0	0.000232558	0
CHR1	38281088	+	G	A	MTF1	P661L	0.128	0.5645	0	0	0
CHR11	64037602	+	G	C	BAD	P132R	0.164	0.485	0.00228938	0	0
CHR14	105417574	+	G	A	AHNAK2	A1405V	0.249	0.3533	0	0	0
CHR19	39221822	+	G	A	CAPN12	R667C	0.654	0.0942	0.00137363	0.00232558	0
CHR10	101089176	+	T	C	CNNM1	V11A	0.235	0.3702	0	0	0
CHR19	23836930	+	A	G	ZNF675	S269P	0.208	0.4073	0	0	0
CHR8	8560290	+	G	A	CLDN23	G128S	0.059	0.7827	0	0	0
CHR12	55968953	+	G	A	OR2AP1	S252N	0.137	0.5415	0	0	0
CHR3	98216879	+	G	A	OR5K2	A119T	0.596	0.119	0	0	0
CHR11	66360021	+	C	T	CCDC87	A156T	0.514	0.1555	0.00457875	0.00953488	0.0024966
CHR17	649571	+	T	C	GEMIN4	N571S	0.249	0.3533	0.00549451	0.00697674	0.00226963
CHR13	25671967	+	G	T	PABPC3	R544M	0.187	0.4411	0	0	0
CHR8	10464616	+	G	A	RP1L1	T2331M	0.013	0.9623	0.000915751	0.00406977	0.00113482
CHR17	79477815	+	G	A	ACTG1	A338V	0.208	0.4073	0.000915751	0.0022093	0.00068089
CHR17	7976187	+	T	A	ALOX12B	N670Y	0.231	0.3758	0	0	0
CHR13	25670945	+	T	G	PABPC3	D203E	0.342	0.2596	0	0	0
CHR12	11183451	+	A	C	TAS2R31	L162V	0.062	0.7715	0	0	0
CHR12	7249553	+	T	C	C1RL	N300D	0.048	0.825	0	0	0
CHR15	94899388	+	G	A	MCTP2	R343Q	0.202	0.4165	0.000915751	0.00209302	0.00068089
CHR11	124617523	+	T	C	VSIG2	M298V	0.031	0.8927	0	0	0
CHR2	114257401	+	A	G	FOXD4L1	M190V	0.497	0.1642	0	0.00953488	0.00204267
CHR21	32090978	+	C	T	KRTAP21-3	G34S	0.171	0.471	0	0	0
CHR5	140567187	+	A	G	PCDHB9	K99E	0.081	0.7044	0.00412088	0.005	0.000453926
CHR12	11243940	+	T	C	TAS2R43	M297V	0.062	0.7715	0	0	0
CHR3	170584267	+	G	A	RPL22L1	R91C	0.927	0.0113	0	0	0
CHR2	176987959	+	G	T	HOXD9	G155W	0.494	0.1652	0.00412088	0	0
CHR9	34723278	+	C	T	FAM205A	R1320H	0.334	0.2663	0.0018315	0.00244186	0.00068089
CHR1	38227566	+	T	C	EPHA10	T121A	0.504	0.1602	0	0.000232558	0
CHR19	23543241	+	A	G	ZNF91	I847T	0.158	0.496	0	0	0
CHR2	73114673	+	G	A	SPR	V38I	0.181	0.452	0.00320513	0.00430233	0.00136178
CHR4	436563	+	T	C	ZNF721	T565A	0.077	0.7176	0	0	0
CHR19	9578460	+	G	A	ZNF560	P388L	0.093	0.6622	0	0.000813953	0
CHR11	5410894	+	C	T	OR51M1	T89M	0.485	0.1688	0.000457875	0.00162791	0.000226963
CHR16	71660385	+	C	A	MARVELD3	P85T	0.137	0.5415	0	0.000348837	0
CHR20	23345909	+	C	T	GZF1	P297S	0.154	0.5041	0	0.000232558	0
CHR2	240969179	+	A	G	OR6B2	L223P	0.813	0.0417	0.003663	0.00662791	0.00113482
CHR7	25175698	+	G	A	C7orf31	R556C	0.341	0.2604	0.000915751	0.00360465	0.00136178
CHR14	94953823	+	G	C	SERPINA12	H354Q	0.854	0.0289	0	0.00186047	0
CHR1	1007633	+	G	A	RNF223	T105M	0.815	0.0409	0	0	0
CHR3	75788199	+	T	C	ZNF717	H192R	0.398	0.2193	0	0	0
CHR19	39798464	+	C	G	LRFN1	D709H	0.319	0.2804	0	0	0
CHR5	78076320	+	C	T	ARSB	R501H	0.634	0.1018	0.000457875	0.000116279	0
CHR17	29298390	+	A	G	RNF135	H100R	0.063	0.7674	0	0.00139535	0
CHR15	34673719	+	C	G	GOLGA8A	V569L	0.138	0.5394	0	0	0
CHR16	33961654	+	T	G	LINC00273	T263P	0.088	0.6797	0	0	0
CHR15	29415664	+	A	G	FAM189A1	S500P	0.627	0.1051	0	0	0
CHR6	30656463	+	C	T	NRM	R196Q	0.054	0.8022	0	0	0
CHR5	140237968	+	A	G	PCDHA10	M779V	0.021	0.9306	0.000457875	0.000813953	0
CHR14	101347786	+	G	A	RTL1	R1114W	0.144	0.5264	0.00320513	0	0
CHR19	52520550	+	C	T	ZNF614	V101M	0.054	0.8022	0.00137363	0.00511628	0.00136178
CHR8	6669210	+	C	T	XKR5	G524R	0.075	0.7247	0.00137363	0.00244186	0.000453926
CHR1	152082376	+	C	A	TCHH	R1106L	0.143	0.5286	0	0.000116279	0.00590104
CHR14	105415229	+	T	C	AHNAK2	M2187V	0.027	0.9076	0	0	0
CHR7	72727156	+	C	T	TRIM50	G409S	0.139	0.5371	0	0.00197674	0.000226963
CHR20	44996139	+	T	A	ELMO2	T675S	0.54	0.1432	0	0	0
CHR1	109794593	+	C	T	CELSR2	T631M	0.778	0.0519	0.0018315	0.00430233	0.00136178
CHR15	56924041	+	C	A	ZNF280D	Q852H	0.183	0.4487	0	0	0
CHR14	81734773	+	C	G	STON2	E101D	0.055	0.7986	0	0	0
CHR18	72346109	+	A	G	ZNF407	E1045G	0.282	0.3156	0	0	0
CHR16	88496595	+	C	T	ZNF469	P906L	0.085	0.6913	0.00641026	0	0
CHR10	75557731	+	C	T	ZSWIM8	R848C	0.131	0.5573	0.000457875	0.00151163	0.000226963
CHR5	140590368	+	T	C	PCDHB12	L630P	0.335	0.2653	0	0.00151163	0.000226963
CHR16	90124887	+	T	C	PRDM7	K130E	0.013	0.9623	0	0	0
CHR11	123887107	+	A	G	OR10G4	T276A	0.203	0.415	0.000457875	0.00104651	0.000453926
CHR7	74211416	+	G	A	GTF2IRD2	A812V	0.059	0.7827	0	0	0
CHR9	85863101	+	G	A	FRMD3	S166L	0.014	0.9588	0	0.00244186	0.000226963
CHR10	98741307	+	G	T	C10orf12	A54S	0.345	0.2574	0	0	0
CHRX	104463832	+	C	A	TEX13A	G349V	0.024	0.9193	0.00602773	0.00895349	0.00136178
CHR14	105417548	+	G	C	AHNAK2	L1414V	0.061	0.7753	0	0	0
CHR1	23520000	+	C	T	HTR1D	R238H	0.221	0.3888	0.000457875	0	0
CHR8	53853240	+	C	T	NPBWR1	A258V	0.173	0.4675	0	0	0
CHR5	140562930	+	G	A	PCDHB16	A266T	0.91	0.0153	0	0	0
CHR19	4361688	+	A	G	SH3GL1	I275T	0.388	0.2255	0	0	0
CHR1	248058983	+	T	G	OR2W3	L32R	0.93	0.0107	0.00137363	0.000232558	0.000453926
CHR19	19905923	+	C	T	ZNF506	R226K	0.014	0.9588	0	0	0
CHR17	43922672	+	C	A	SPPL2C	L134M	0.136	0.5441	0	0.00151163	0
CHR5	174151901	+	T	G	MSX2	L80R	0.6	0.117	0	0	0
CHR18	45555747	+	C	T	ZBTB7C	V582M	0.085	0.6913	0	0	0
CHR4	1816257	+	C	T	LETM1	S705N	0.091	0.6693	0	0	0
CHR11	40137800	+	C	T	LRRC4C	G15S	0.751	0.0604	0.000457875	0.00302326	0.00068089
CHR2	60688245	+	G	A	BCL11A	T601I	0.478	0.1729	0	0	0
CHR5	76373168	+	G	C	ZBED3	A179G	0.127	0.5673	0	0	0
CHR14	81422130	+	G	C	TSHR	D36H	0.311	0.288	0.00228938	0.00755814	0.00295052
CHR3	142840320	+	G	A	CHST2	S221N	0.236	0.3691	0	0	0
CHR1	203769084	+	A	G	ZBED6	I812V	0.039	0.8605	0	0	0
CHR20	57430118	+	C	G	GNAS	R600G	0.251	0.3511	0.0018315	0.00546512	0.00136178
CHR5	71516795	+	G	C	MRPS27	Q396E	0.18	0.4544	0.00412088	0.00395349	0
CHR19	3585645	+	C	G	GIPC3	A17G	0.083	0.6979	0	0	0
CHR1	158746588	+	C	T	OR6N2	V280I	0.059	0.7827	0.000457875	0.000348837	0.000226963
CHR3	195447886	+	G	C	MUC20	C3S	0.017	0.9463	0	0	0
CHR5	140475665	+	C	A	PCDHB2	P431T	0.749	0.0608	0.00228938	0.0055814	0.000453926
CHR3	10146350	+	G	A	FANCD2OS	P37S	0.373	0.2351	0	0	0
CHR10	98743123	+	A	G	C10orf12	K659R	0.028	0.9035	0	0	0
CHR21	37416244	+	G	A	SETD4	A246V	0.29	0.3071	0	0.000116279	0
CHR16	86601524	+	C	G	FOXC2	P195A	0.172	0.4692	0	0	0
CHR19	22156781	+	T	A	ZNF208	K352M	0.079	0.7114	0	0	0
CHRX	68381165	+	G	C	PJA1	F451L	0.234	0.3717	0.00482218	0.00453488	0.00136178
CHR13	52508989	+	G	A	ATP7B	T1227M	0.037	0.8681	0.00137363	0.00116279	0.00499319
CHR11	111746169	+	C	T	FDXACB1	R451H	0.096	0.6519	0.00320513	0	0.00748979
CHR17	42082417	+	C	G	NAGS	T129S	0.122	0.5795	0	0	0
CHR14	70039163	+	G	A	CCDC177	R393*	0.995158	Nonsense	0	0	0
CHR19	51021984	+	G	A	LRRC4B	T329M	0.667	0.0896	0	0.000465116	0
CHR14	74179615	+	G	C	PNMA1	S243C	0.321	0.2787	0.000457875	0.000116279	0
CHR19	40903436	+	G	T	PRX	L275I	0.284	0.3137	0	0.000813953	0.000226963
CHR14	38061018	+	G	A	FOXA1	P324L	0.069	0.7455	0	0	0
CHR9	131710015	+	G	C	NUP188	G6A	0.364	0.2419	0	0.000348837	0.000226963
CHR6	39282873	+	G	T	KCNK16	P232T	0.027	0.9076	0	0	0
CHR22	21982861	+	T	G	YDJC	E273A	0.952	0.0064	0	0	0
CHR19	58879843	+	A	C	ZNF837	L286R	0.699	0.0773	0	0	0
CHR7	148769428	+	C	T	ZNF786	A146T	0.072	0.7351	0	0.000697674	0
CHR15	77407219	+	A	G	PEAK1	L1507P	0.979	0.0016	0	0	0
CHR3	138763269	+	G	A	PRR23C	A65V	0.364	0.2419	0	0	0
CHR19	9677547	+	G	A	ZNF121	T81M	0.079	0.7114	0.000457875	0.00162791	0.000226963
CHR14	20215941	+	A	G	OR4Q3	M119V	0.467	0.1791	0.000457875	0.00372093	0.00136178
CHR19	1506031	+	G	A	ADAMTSL5	R467W	0.518	0.1535	0.00412088	0.005	0.00158874
CHR7	97842004	+	C	T	BHLHA15	T128M	0.701	0.0767	0	0	0
CHR19	21476932	+	G	A	ZNF708	P279L	0.302	0.2967	0	0	0
CHR7	150751122	+	A	C	CDK5	Y253D	0.783	0.0503	0	0	0
CHR1	247654562	+	A	G	OR2W5	I45V	0.402	0.2165	0	0	0
CHR19	21991331	+	A	G	ZNF43	I438T	0.164	0.485	0	0	0
CHR11	124967615	+	C	T	TMEM218	G79S	0.798	0.046	0	0.0022093	0.000907853
CHR5	177419966	+	G	A	PROP1	A142V	0.106	0.6225	0.000915751	0.00337209	0.00068089
CHR1	161141745	+	C	G	B4GALT3	G348A	0.186	0.4431	0	0	0
CHR6	99849261	+	T	C	PNISR	S525G	0.318	0.2814	0.000457875	0.000348837	0
CHR9	131019755	+	C	T	GOLGA2	R896H	0.346	0.2565	0	0	0
CHR3	9976219	+	C	G	CRELD1	P33A	0.184	0.447	0	0	0
CHR10	50819228	+	C	T	SLC18A3	R148C	0.939	0.0088	0	0.000116279	0
CHR6	154360923	+	G	A	OPRM1	V82M	0.883	0.0222	0	0	0
CHR1	248308916	+	C	G	OR2M5	A156G	0.092	0.6656	0.00457875	0	0
CHR21	32119310	+	G	A	KRTAP21-2	R71*	0.995158	Nonsense	0.000457875	0.00313953	0.000226963
CHR11	55339746	+	A	C	OR4C16	K48T	0.437	0.1953	0.000915751	0.00116279	0
CHR7	127251152	+	C	T	PAX4	W333*	0.995158	Nonsense	0.000457875	0.000116279	0
CHRX	17394091	+	C	T	NHS	P71S	0.263	0.3367	0	0	0
CHR2	234826077	+	G	C	TRPM8	E1-	0.995158	Splice site	0	0	0
[truncated: 7,335 more rows]
